# Supplementary material
Source: PubMed Central journal article supplement (PMC3421733)
Supplement: JVI.00907-12_zjv999096381so1.pdf [file JVI.00907-12_zjv999096381so1.pdf]

1 **Supplemental Information**

2 *Paramecium bursaria* Chlorella Virus 1 Proteome Reveals Novel Architectural and  
3 Regulatory Features of a Giant Virus

4 David D. Dunigan, Ronald L. Cerny, Andrew T. Bauman, Jared C. Roach, Leslie C.  
5 Lane, Irina V. Agarkova, Kurt Wulser, Giane M. Yanai-Balser, James R. Gurnon, Jason  
6 C.Vitek, Bernard J. Kronschnabel, Adrien Jeannard, Guillaume Blanc, Chris Upton,  
7 Garry A. Duncan, O. William McClung, Fangrui Ma, James L. Van Etten

8  
9 ***Genome re-sequencing with Roche 454 Life Sciences GS FLX Titanium***

10 Preliminary proteomic analyzes using the existing PBCV-1 gene annotations  
11 (NCBI Refseq: NC\_000852) revealed possible errors in the genome sequence, which  
12 prompted re-sequencing of the PBCV-1 genome. PBCV-1 DNA was purified from  
13 virions that had been treated with 10 units DNase I per ml in 50 mM Tris-HCl pH 7.8/1  
14 mM CaCl<sub>2</sub>/10 mM MnCl<sub>2</sub> at 37°C for 1 hr, then prepared as described above, using the  
15 UltraClean®Blood DNA Isolation Kit (MO BIO Laboratories, Carlsbad, CA). The DNA  
16 was evaluated for quantity and quality by measuring absorbance at 260 and 280 nm with  
17 a Thermo Scientific NanoDrop 2000 spectrophotometer, and by measuring fluorescence  
18 of dye-augmented DNA using the PicoGreen and a Qubit fluorometer (Invitrogen,  
19 Carlsbad, California). Using the Roche Rapid Library Preparation method for GS FLX  
20 Titanium chemistry (Roche 454 Life Sciences, Branford, Connecticut), sample DNA was  
21 fragmented by nebulization. DNA fragments were end repaired with polynucleotide  
22 kinase and T4 DNA polymerase, then purified by size exclusion chromatography.

23 Selected DNA fragments were ligated to a Rapid Library Multiplex Identifier (MID)  
24 adaptor designed for GS FLX Titanium chemistry. The MID adaptors were designed  
25 with a unique decamer sequence to facilitate multiplex sequencing with the 454  
26 technology, such that the resulting library reads can be reliably sorted after sequencing  
27 using SFF software tools. MID adaptor ligated DNA fragments were again size selected  
28 by chromatography, quantified with a TBS-380 mini-fluorometer (Promega, Madison,  
29 Wisconsin). The Rapid Library quality was assessed with an Agilent Bioanalyzer High  
30 Sensitivity DNA chip (Agilent Technologies, Santa Clara, California). The average  
31 fragment length was between 600 bp and 900 bp, with the lower size cut-off at less than  
32 10% below 350 bp. Pooled DNAs were titrated to obtain the optimal copies per bead  
33 (cpb). After titration, 3 cpb was chosen as the best DNA and bead ratio and  
34 corresponding amounts of DNA were added to the subsequent emPCR reactions.  
35 EmPCR was performed with the 454/Roche Lib-L (LV) kits following manufacturer's  
36 protocol for the Roche 454 GS FLX Titanium.

### 37 *Deep pyrosequencing and data processing*

38 The emPCR products were sequenced using Roche-454 GS FLX Titanium  
39 chemistry. PBCV-1 DNA was sequenced twice giving a total of 98,258 quality-filtered  
40 reads. Raw reads were filtered according to length and quality criteria. Filter-pass reads  
41 were parsed into sample-barcoded bins and ported to a local database

42 The raw data from the 454 pyrosequencing machine were first processed through  
43 a quality filter that removed sequence reads that did not meet the following criteria: i) A  
44 complete forward primer and barcode. ii)  $\leq 2$  "N" in a sequence read, where N is

45 equivalent to an interrupted and resumed signals from sequential flows. iii) 200 nt  $\leq$   
46 sequence length  $\leq$  500 nt. iv) Average quality score  $\geq$  20. After filtering, each read was  
47 trimmed to remove 3' adapter and primer sequences and was parsed by a MID adaptor  
48 barcode. The corresponding QUAL file also was updated to remove quality scores from  
49 reads not passing quality filters. The files are associated with sample information in a  
50 hierarchical manner in MySQL tables. The processed data and the MySQL database  
51 tables were stored on a database server and shared within the assembly/annotation team.

## 52 *Genome assembly*

53 Genome assembly was achieved using both automated pipeline and hand-curation  
54 methods. Initially, the sff files were processed with the 454 Life Sciences GS De novo  
55 Assembler software (program version 2.3). The sample was passed through the program  
56 using default settings. Adjustments to those default settings gave no significant  
57 improvement in the assembled sequence. The sample assembled into 12 contigs.  
58 Additionally, 454 Life Science GS Mapper software was used with the original PBCV-1  
59 genome used as the reference sequence; this too resulted in multiple contigs (>12)  
60 assigned to PBCV-1.

61 The average sequence depth of coverage was >40X over the entire PBCV-1  
62 genome from duplicate sequencing runs; however, some regions had approximately 100X  
63 coverage while there was no coverage in other regions (i. e., 11 contig gaps). As part of  
64 this sequencing project, 10 PBCV-1 antigenic mutants were also sequenced (samples  
65 prepared and processed as described above). The mutants were also passed through the  
66 GS De Novo Assembler and Mapper software programs. Both methods yielded multiple

67 contigs for each viral genome. One persistent major gap region observed in all of the  
68 PBCV-1 isolates involved the *a122/123r* gene region, which contains highly repetitive  
69 sequences, perhaps explaining why the gsMapper and gsAssembler programs were  
70 unable to assign sequencing reads to this region. This region was re-sequenced with  
71 Sanger-based methods and the revised *a122/123r* gene sequence was used to fill in the  
72 gap between these two adjacent contigs. Sequencing the PBCV-1 antigenic mutants also  
73 proved helpful, because we obtained at least one read from at least one antigenic mutant  
74 for each of the remaining gaps. The final sequencing problem occurred at the 5' and 3'  
75 ends of the sequence, which are reverse complementary repeats of one another (5). One  
76 of the PBCV-1 antigenic mutants had reads that extended to near one end of the genome.  
77 This region was reverse complemented and used to fill in the gap at the other end of the  
78 genome.

### 79 ***Identification of the PBCV-1 contigs***

80         The PBCV-1 contigs were identified by BLAST searches (1) against the NCBI  
81 non-redundant/nucleotide database limited to Chlorovirus (tax id: 181083). The contigs  
82 were assumed to match viruses that infect *C. variabilis* (PBCV-1, NY-2A or AR158).  
83 Each contig was assigned to a virus based on the best BLAST hit. Most of the reads  
84 (99.28%) fit PBCV-1, seven relatively small contigs were ambiguous as to their BLAST  
85 search and discarded.

### 86 ***Genome annotation***

87         The genome annotation was conducted using a semi-automatic in-house  
88 annotation pipeline. The majority of protein-coding genes were annotated with the

89 Genome Annotation Transfer Utility (GATU) tool using the PBCV-1 genome and gene  
90 calls (Refseq: NC 000852.4) as the reference genome (7). The GATU tool was used  
91 iteratively, initially to accept ORFs that were substantially unchanged (100% identity,  
92 Unassigned ORFs >95% identity), creating a list of 613 ORFs. The second pass  
93 identified ORFs that had substantially changed, e.g., a few cases two adjacent ORFs were  
94 found to be a single ORF due to a single nucleotide polymorphism (SNP) resulting in a  
95 stop-codon. The third pass selected all New Annotations and all Unassigned-ORFs with  
96 percent identity values above zero. Where two ORFs had identical starts or stops, the  
97 larger ORF was selected and the smaller one was not considered further. In the fourth  
98 iteration, GATU was used where the "third iteration" with all ORFs (both assigned and  
99 unassigned) was the reference sequence and the newly 454 sequenced and assembled  
100 PBCV-1 was annotated. The result was a list of New Annotations of the ORFs, with no  
101 Unassigned-ORFs. These were evaluated by eye to determine if there were overlapping  
102 and in-frame ORFs; there were none. The list contained 802 ORFs. These gene calls  
103 were then examined for predicted function.

104 Functional annotations (gene and protein properties) of the called genes were  
105 assigned to give both qualitative and quantitative data for the determined ORFs. Transfer  
106 RNAs were predicted using the tRNAscan-SE software (3). Gene calls were checked  
107 using the following 5-step process: i) putative homologs were identified by searching the  
108 protein sequences against the Swiss-Prot (8) and RefSeq (9) protein databases using the  
109 BLASTp (1) program (e-value < 1e-5). Because of very strong similarities between *C.*  
110 *variabilis* NC64A infecting viruses, hits from PBCV-1, NY2A and AR158 viruses were  
111 discarded in RefSeq while only previously existing entries from PBCV-1 were ignored in

112 the Swiss-Prot alignments. Only the best hit from the two databases was kept and  
113 assigned as possible homologs of the predicted ORFs. ii) KEGG terms were assigned by  
114 submitting the entire predicted proteome to the KEGG Automatic Annotation Server  
115 [KAAS] (4), using the Bidirectionnal Best Hit method with an extended "Representative  
116 for GENE" reference dataset, combining 30 complete genomes ranging from eukaryotes  
117 to prokaryotes. iii) Genes were also assigned to a functional cluster using the BLASTp  
118 program against the Clusters of Orthologous Groups [COG] (6) dataset and assigning the  
119 best-hit's cluster to the query protein (e-value < 1e-5). iv) Protein domain/family  
120 predictions were made using PfamScan software (e-value < 1e-5), keeping only matches  
121 from the manually curated portion of the Pfam database (2). v) And finally, annotations  
122 were manually added to genes when experimental evidence from the literature supported  
123 the existence of a protein or characterized its function.

124 Table S1. PBCV-1 genes and gene annotations

| Gene      | Start | End  | %A<br>T | nt   | aa  | Da    | pI   | Stage | Virionic | COG                                   | PfamA                                                                 | BLASTp                                                                                              | Swissprot                                                                                                                                                                                    | Product              | TM prediction <sup>1</sup> |   |   |
|-----------|-------|------|---------|------|-----|-------|------|-------|----------|---------------------------------------|-----------------------------------------------------------------------|-----------------------------------------------------------------------------------------------------|----------------------------------------------------------------------------------------------------------------------------------------------------------------------------------------------|----------------------|----------------------------|---|---|
|           |       |      |         |      |     |       |      |       |          |                                       |                                                                       |                                                                                                     |                                                                                                                                                                                              |                      | T                          | H | P |
| a001L     | 280   | 549  | 68      | 270  | 89  | 10191 | 9.1  | N/A   | N/A      | N/A                                   | N/A                                                                   | N/A                                                                                                 | N/A                                                                                                                                                                                          | Hypothetical protein | 0                          | 0 | 0 |
| A002L     | 512   | 1063 | 66      | 552  | 183 | 21545 | 9.4  | Early | N/A      | N/A                                   | N/A                                                                   | N/A                                                                                                 | N/A                                                                                                                                                                                          | Unknown protein      | 0                          | 0 | 0 |
| a002aR    | 1022  | 1177 | 66      | 156  | 51  | 5820  | 9.3  | N/A   | N/A      | N/A                                   | N/A                                                                   | N/A                                                                                                 | N/A                                                                                                                                                                                          | Hypothetical protein | 0                          | 0 | 0 |
| A002bL    | 1174  | 1335 | 56      | 162  | 53  | 6037  | 11.8 | N/A   | N/A      | N/A                                   | N/A                                                                   | N/A                                                                                                 | N/A                                                                                                                                                                                          | Hypothetical protein | 0                          | 0 | 0 |
| A002cR    | 1367  | 1513 | 14      | 147  | 48  | 5331  | 11.2 | N/A   | N/A      | N/A                                   | N/A                                                                   | N/A                                                                                                 | N/A                                                                                                                                                                                          | Hypothetical protein | 0                          | 0 | 0 |
| a002dR    | 1408  | 1539 | 12      | 132  | 43  | 4606  | 12.8 | N/A   | N/A      | N/A                                   | N/A                                                                   | N/A                                                                                                 | N/A                                                                                                                                                                                          | Hypothetical protein | 0                          | 0 | 0 |
| A003R     | 1792  | 2217 | 70      | 426  | 141 | 15974 | 8.5  | Early | N/A      | N/A                                   | N/A                                                                   | N/A                                                                                                 | N/A                                                                                                                                                                                          | Unknown protein      | 0                          | 1 | 1 |
| a004L     | 1891  | 2127 | 58      | 237  | 78  | 8746  | 9.1  | N/A   | N/A      | N/A                                   | N/A                                                                   | N/A                                                                                                 | N/A                                                                                                                                                                                          | Hypothetical protein | 0                          | 0 | 0 |
| a004aL    | 2221  | 2361 | 52      | 141  | 46  | 5788  | 10.7 | N/A   | N/A      | N/A                                   | N/A                                                                   | N/A                                                                                                 | N/A                                                                                                                                                                                          | Hypothetical protein | 0                          | 0 | 0 |
| A005R     | 2288  | 3094 | 66      | 807  | 268 | 28726 | 6.1  | Early | N/A      | COG0666 [FOG: Ankyrin repeat] [1e-05] | PF00023.23 [Ankyrin repeat] [6.3e-11]                                 | YP_001426468 [hypothetical protein FR483_N836L (Paramecium bursaria Chlorella virus FR483)] [2e-44] | Q54KA7 [RecName: FullAnkyrin repeat PH and SEC7 domain containing protein secG] [1e-29]                                                                                                      | Unknown protein      | 0                          | 0 | 0 |
| a006L     | 2393  | 2611 | 60      | 219  | 72  | 8415  | 8.6  | N/A   | N/A      | N/A                                   | N/A                                                                   | N/A                                                                                                 | N/A                                                                                                                                                                                          | Hypothetical protein | 0                          | 0 | 0 |
| A007/008L | 3292  | 4701 | 84      | 1410 | 469 | 51172 | 9.2  | Early | N/A      | COG0666 [FOG: Ankyrin repeat] [6e-06] | PF00023.23 [Ankyrin repeat] [1.1e-07]                                 | XP_749852 [Pfs NACHT and Ankyrin domain protein (Aspergillus fumigatus Af293)] [2e-55]              | Q502K3 [RecName: FullSerine/threonine-protein phosphatase 6 regulatory ankyrin repeat subunit C ShortSerine/threonine-protein phosphatase 6 regulatory subunit ARS-C ShortPP6-ARS-C] [2e-48] | Unknown protein      | 0                          | 0 | 0 |
| A009R     | 4998  | 5735 | 84      | 738  | 245 | 27634 | 8.1  | Early | N/A      | N/A                                   | PF07150.4 [Protein of unknown function (DUF1390)] [7.8e-89]           | YP_001426165 [hypothetical protein FR483_N533L (Paramecium bursaria Chlorella virus FR483)] [2e-80] | N/A                                                                                                                                                                                          | Unknown protein      | 0                          | 0 | 0 |
| A010R     | 5768  | 6973 | 88      | 1206 | 401 | 44998 | 5.2  | Late  | Yes      | N/A                                   | PF04451.5 [Large eukaryotic DNA virus major capsid protein] [1.9e-50] | YP_001426987 [hypothetical protein ATCV1_Z506L (Acanthocystis turfacea Chlorella virus 1)] [1e-89]  | A7U6E9 [RecName: Fullmajor capsid protein ShortMCP] [8e-45]                                                                                                                                  | Capsid protein       | 0                          | 0 | 0 |
| a010aR    | 6837  | 7022 | 60      | 186  | 61  | 7342  | 11.7 | N/A   | N/A      | N/A                                   | N/A                                                                   | N/A                                                                                                 | N/A                                                                                                                                                                                          | Hypothetical protein | 0                          | 1 | 0 |
| A011L     | 6970  | 8181 | 84      | 1212 | 403 | 45076 | 5.4  | Late  | Yes      | N/A                                   | PF04451.5 [Large eukaryotic                                           | YP_001426987 [hypothetical protein                                                                  | A7U6E9 [RecName: Fullmajor capsid                                                                                                                                                            | Capsid protein       | 0                          | 0 | 0 |

|               |       |       |    |      |      |        |      |      |     |     |                                                       | DNA virus major capsid protein [2.9e-61]                                                           | ATCV1_Z506L (Acanthocystis turfacea Chlorella virus 1) [1e-106] | protein ShortMCP] [2e-43] |                      |   |   |   |
|---------------|-------|-------|----|------|------|--------|------|------|-----|-----|-------------------------------------------------------|----------------------------------------------------------------------------------------------------|-----------------------------------------------------------------|---------------------------|----------------------|---|---|---|
| a012R         | 7897  | 8190  | 64 | 294  | 97   | 11450  | 8.3  | N/A  | N/A | N/A | N/A                                                   | N/A                                                                                                | N/A                                                             | N/A                       | Hypothetical protein | 0 | 0 | 0 |
| a013L         | 8230  | 8571  | 58 | 342  | 113  | 12408  | 9.7  | N/A  | N/A | N/A | N/A                                                   | N/A                                                                                                | N/A                                                             | N/A                       | Hypothetical protein | 0 | 0 | 0 |
| A014R         | 8255  | 12364 | 40 | 4110 | 1369 | 141382 | 6.3  | Late | Yes | N/A | N/A                                                   | N/A                                                                                                | N/A                                                             | N/A                       | Unknown protein      | 0 | 0 | 0 |
| a015L         | 8863  | 9411  | 48 | 549  | 182  | 20131  | 4.0  | N/A  | N/A | N/A | N/A                                                   | N/A                                                                                                | N/A                                                             | N/A                       | Hypothetical protein | 0 | 3 | 0 |
| a016L         | 9808  | 10500 | 64 | 693  | 230  | 25288  | 4.4  | N/A  | N/A | N/A | N/A                                                   | N/A                                                                                                | N/A                                                             | N/A                       | Hypothetical protein | 3 | 4 | 3 |
| a017L         | 11371 | 11571 | 54 | 201  | 66   | 7325   | 4.8  | N/A  | N/A | N/A | N/A                                                   | N/A                                                                                                | N/A                                                             | N/A                       | Hypothetical protein | 0 | 0 | 0 |
| A018L         | 12367 | 16374 | 80 | 4008 | 1335 | ####   | 4.9  | Late | Yes | N/A | PF06598.4 [Chlorovirus glycoprotein repeat] [1.2e-11] | N/A                                                                                                | N/A                                                             | N/A                       | Unknown protein      | 0 | 0 | 0 |
| a019R         | 12869 | 13519 | 60 | 651  | 216  | 23794  | 5.7  | N/A  | N/A | N/A | N/A                                                   | N/A                                                                                                | N/A                                                             | N/A                       | Hypothetical protein | 0 | 3 | 0 |
| a020R         | 13889 | 14143 | 62 | 255  | 84   | 9524   | 10.8 | N/A  | N/A | N/A | N/A                                                   | N/A                                                                                                | N/A                                                             | N/A                       | Hypothetical protein | 1 | 2 | 1 |
| a021R         | 14165 | 14632 | 68 | 468  | 155  | 17744  | 3.9  | N/A  | N/A | N/A | N/A                                                   | N/A                                                                                                | N/A                                                             | N/A                       | Hypothetical protein | 0 | 2 | 0 |
| a022R         | 14702 | 15031 | 58 | 330  | 109  | 12127  | 4.6  | N/A  | N/A | N/A | N/A                                                   | N/A                                                                                                | N/A                                                             | N/A                       | Hypothetical protein | 0 | 2 | 0 |
| a023R         | 15482 | 15706 | 70 | 225  | 74   | 8102   | 6.6  | N/A  | N/A | N/A | N/A                                                   | N/A                                                                                                | N/A                                                             | N/A                       | Hypothetical protein | 1 | 2 | 2 |
| a024R         | 15770 | 16132 | 64 | 363  | 120  | 13384  | 3.7  | N/A  | N/A | N/A | N/A                                                   | N/A                                                                                                | N/A                                                             | N/A                       | Hypothetical protein | 1 | 2 | 1 |
| A025/027/029L | 16432 | 20511 | 78 | 4080 | 1359 | ####   | 4.4  | Late | Yes | N/A | N/A                                                   | N/A                                                                                                | N/A                                                             | N/A                       | Unknown protein      | 0 | 0 | 0 |
| a026R         | 16916 | 17512 | 72 | 597  | 198  | 21885  | 5.1  | N/A  | N/A | N/A | N/A                                                   | N/A                                                                                                | N/A                                                             | N/A                       | Hypothetical protein | 5 | 5 | 5 |
| a030R         | 18185 | 18721 | 72 | 537  | 178  | 20284  | 4.2  | N/A  | N/A | N/A | N/A                                                   | N/A                                                                                                | N/A                                                             | N/A                       | Hypothetical protein | 2 | 3 | 2 |
| a031R         | 18755 | 19030 | 54 | 276  | 91   | 10478  | 4.1  | N/A  | N/A | N/A | N/A                                                   | N/A                                                                                                | N/A                                                             | N/A                       | Hypothetical protein | 1 | 2 | 1 |
| a032R         | 19232 | 19810 | 68 | 579  | 192  | 21498  | 5.2  | N/A  | N/A | N/A | N/A                                                   | N/A                                                                                                | N/A                                                             | N/A                       | Hypothetical protein | 0 | 5 | 3 |
| a033R         | 20189 | 20428 | 66 | 240  | 79   | 8651   | 10.4 | N/A  | N/A | N/A | N/A                                                   | N/A                                                                                                | N/A                                                             | N/A                       | Hypothetical protein | 0 | 0 | 0 |
| A034R         | 20572 | 21498 | 18 | 927  | 308  | 35163  | 10.4 | Late | Yes | N/A | PF00069.18 [Protein kinase domain] [1.4e-07]          | N/A                                                                                                | N/A                                                             | N/A                       | Protein kinase       | 0 | 1 | 0 |
| A035L         | 21500 | 23260 | 88 | 1761 | 586  | 65606  | 8.9  | Late | Yes | N/A | N/A                                                   | YP_001426757 [Hypothetical protein ATCV1_Z276L (Acanthocystis turfacea Chlorella virus 1)] [1e-10] | N/A                                                             | N/A                       | Unknown protein      | 0 | 1 | 0 |



|        |       |           |    |      |     |       |      |            |     |                                                               |                                                                                                                   |                                                                                                      |                                                                                                                                      |                      |   |   |   |
|--------|-------|-----------|----|------|-----|-------|------|------------|-----|---------------------------------------------------------------|-------------------------------------------------------------------------------------------------------------------|------------------------------------------------------------------------------------------------------|--------------------------------------------------------------------------------------------------------------------------------------|----------------------|---|---|---|
| a036R  | 22696 | 2303<br>7 | 56 | 342  | 113 | 12942 | 8.1  | N/A        | N/A | N/A                                                           | N/A                                                                                                               | N/A                                                                                                  | N/A                                                                                                                                  | Hypothetical protein | 1 | 1 | 1 |
| A037L  | 23288 | 2360<br>5 | 68 | 318  | 105 | 12822 | 9.8  | Early      | N/A | N/A                                                           | N/A                                                                                                               | N/A                                                                                                  | N/A                                                                                                                                  | Unknown protein      | 0 | 0 | 0 |
| a038R  | 23584 | 2382<br>3 | 68 | 240  | 79  | 9448  | 10.3 | N/A        | N/A | N/A                                                           | N/A                                                                                                               | N/A                                                                                                  | N/A                                                                                                                                  | Hypothetical protein | 0 | 0 | 0 |
| A039L  | 23623 | 2407<br>8 | 80 | 456  | 151 | 17102 | 4.1  | Early      | N/A | COG5201 [SCF ubiquitin ligase SKP1 component] [6e-16]         | PF03931.8 [Skp1 family tetramerisation domain] [5.5e-19] / PF01466.12 [Skp1 family dimerisation domain] [6.8e-31] | XP_001753031 [predicted protein (Physcomitrella patens subsp. patens)] [2e-27]                       | Q9LNT9 [RecName: FullSKP1-like protein 4 ShortAtSK4] [9e-26]                                                                         | Unknown protein      | 0 | 1 | 0 |
| a040L  | 24087 | 2447<br>6 | 56 | 390  | 129 | 12234 | 3.8  | N/A        | N/A | N/A                                                           | N/A                                                                                                               | N/A                                                                                                  | N/A                                                                                                                                  | Hypothetical protein | 2 | 2 | 0 |
| A041R  | 24148 | 2538<br>6 | 34 | 1239 | 412 | 44315 | 10.8 | Late       | Yes | N/A                                                           | N/A                                                                                                               | YP_001426427 [hypothetical protein FR483_N795L (Paramecium bursaria Chlorella virus FR483)] [1e-116] | N/A                                                                                                                                  | Unknown protein      | 0 | 1 | 0 |
| a042L  | 24238 | 2450<br>4 | 32 | 267  | 88  | 11031 | 12.5 | N/A        | N/A | N/A                                                           | N/A                                                                                                               | N/A                                                                                                  | N/A                                                                                                                                  | Hypothetical protein | 0 | 0 | 0 |
| a043R  | 24798 | 2502<br>5 | 64 | 228  | 75  | 9172  | 9.1  | N/A        | N/A | N/A                                                           | N/A                                                                                                               | N/A                                                                                                  | N/A                                                                                                                                  | Hypothetical protein | 0 | 0 | 0 |
| a044aL | 25328 | 2549<br>2 | 66 | 165  | 54  | 6518  | 12.4 | N/A        | N/A | N/A                                                           | N/A                                                                                                               | N/A                                                                                                  | N/A                                                                                                                                  | Hypothetical protein | 0 | 0 | 0 |
| A044L  | 25383 | 2718<br>2 | 84 | 1800 | 599 | 67849 | 6.4  | Early      | N/A | COG0464 [ATPases of the AAA+ class] [8e-06]                   | PF00004.22 [ATPase family associated with various cellular activities (AAA)] [1.7e-10]                            | XP_810119 [hypothetical protein (Trypanosoma cruzi strain CL Brener)] [6e-21]                        | Q5UR45 [RecName: FullPutative AAA family ATPase L572] [6e-17]                                                                        | Unknown protein      | 0 | 0 | 0 |
| a045R  | 26328 | 2654<br>0 | 52 | 213  | 70  | 8446  | 11.8 | N/A        | N/A | N/A                                                           | N/A                                                                                                               | N/A                                                                                                  | N/A                                                                                                                                  | Hypothetical protein | 0 | 1 | 0 |
| a046R  | 26720 | 2722<br>0 | 68 | 501  | 166 | 19641 | 11.3 | N/A        | N/A | N/A                                                           | N/A                                                                                                               | N/A                                                                                                  | N/A                                                                                                                                  | Hypothetical protein | 0 | 0 | 0 |
| a047L  | 26830 | 2703<br>3 | 64 | 204  | 67  | 7734  | 8.8  | N/A        | N/A | N/A                                                           | N/A                                                                                                               | N/A                                                                                                  | N/A                                                                                                                                  | Hypothetical protein | 0 | 0 | 0 |
| a047aL | 27217 | 2738<br>7 | 58 | 171  | 56  | 6491  | 4.8  | N/A        | N/A | N/A                                                           | N/A                                                                                                               | N/A                                                                                                  | N/A                                                                                                                                  | Hypothetical protein | 1 | 1 | 1 |
| A048R  | 27248 | 2761<br>9 | 18 | 372  | 123 | 14017 | 7.6  | Early-Late | N/A | N/A                                                           | N/A                                                                                                               | YP_001425805 [hypothetical protein FR483_N173R (Paramecium bursaria Chlorella virus FR483)] [2e-19]  | N/A                                                                                                                                  | Unknown protein      | 0 | 0 | 0 |
| A049L  | 27610 | 2826<br>9 | 70 | 660  | 219 | 25062 | 8.0  | Early-Late | N/A | COG0584 [Glycerophosphoryl diester phosphodiesterase] [5e-06] | PF03009.10 [Glycerophosphoryl diester phosphodiesterase family] [3.8e-43]                                         | YP_001426558 [hypothetical protein ATCV1_Z077L (Acanthocystis turfacea Chlorella virus 1)] [5e-48]   | O07592 [RecName: FullPutative glycerophosphoryl diester phosphodiesterase yhdW ShortGlycerophosphodiester phosphodiesterase] [3e-23] | Unknown protein      | 0 | 0 | 0 |

|        |       |           |    |      |     |       |      |       |     |                                                                                   |                                                                                                                                                                                                                      |                                                                                                                                         |                                                                                                                                           |                                              |   |   |   |
|--------|-------|-----------|----|------|-----|-------|------|-------|-----|-----------------------------------------------------------------------------------|----------------------------------------------------------------------------------------------------------------------------------------------------------------------------------------------------------------------|-----------------------------------------------------------------------------------------------------------------------------------------|-------------------------------------------------------------------------------------------------------------------------------------------|----------------------------------------------|---|---|---|
| A050L  | 28286 | 2871<br>1 | 84 | 426  | 141 | 16481 | 9.9  | Early | N/A | N/A                                                                               | PF03013.7<br>[Pyrimidine dimer<br>DNA glycosylase]<br>[9.7e-45]                                                                                                                                                      | YP_001426261<br>[hypothetical protein<br>FR483_N629L<br>(Paramecium bursaria<br>Chlorella virus FR483)]<br>[2e-49]                      | P04418 [RecName:<br>FullEndonuclease V]<br>[2e-21]                                                                                        | Pyrimidine dimer-<br>specific<br>glycosylase | 0 | 0 | 0 |
| A050aL | 28821 | 2896<br>1 | 84 | 141  | 46  | 5443  | 8.4  | N/A   | N/A | N/A                                                                               | N/A                                                                                                                                                                                                                  | N/A                                                                                                                                     | N/A                                                                                                                                       | Hypothetical<br>protein                      | 1 | 1 | 1 |
| A051L  | 28984 | 2959<br>5 | 72 | 612  | 203 | 22804 | 8.6  | Late  | Yes | N/A                                                                               | N/A                                                                                                                                                                                                                  | YP_001427069<br>[hypothetical protein<br>ATCV1_Z588L<br>(Acanthocystis turfacea<br>Chlorella virus 1)] [2e-<br>49]                      | N/A                                                                                                                                       | Unknown protein                              | 1 | 2 | 1 |
| a052R  | 29167 | 2941<br>8 | 62 | 252  | 83  | 10100 | 9.0  | N/A   | N/A | N/A                                                                               | N/A                                                                                                                                                                                                                  | N/A                                                                                                                                     | N/A                                                                                                                                       | Hypothetical<br>protein                      | 1 | 1 | 1 |
| A053R  | 29684 | 3077<br>5 | 62 | 1092 | 363 | 40175 | 6.4  | Early | N/A | COG1052<br>[Lactate<br>dehydrogenase<br>and related<br>dehydrogenases]<br>[1e-05] | PF00389.23 [D-<br>isomer specific 2-<br>hydroxyacid<br>dehydrogenase<br>catalytic domain]<br>[1.4e-34] /<br>PF02826.12 [D-<br>isomer specific 2-<br>hydroxyacid<br>dehydrogenase<br>NAD binding<br>domain] [3.5e-56] | YP_001426776<br>[hypothetical protein<br>ATCV1_Z295L<br>(Acanthocystis turfacea<br>Chlorella virus 1)] [1e-<br>124]                     | P52643 [RecName:<br>FullD-lactate<br>dehydrogenase<br>ShortD-LDH<br>AltName:<br>FullFermentative<br>lactate<br>dehydrogenase] [7e-<br>67] | Unknown protein                              | 0 | 0 | 0 |
| a054L  | 29800 | 3012<br>3 | 56 | 324  | 107 | 11750 | 10.2 | N/A   | N/A | N/A                                                                               | N/A                                                                                                                                                                                                                  | YP_001426779<br>[hypothetical protein<br>ATCV1_z298R<br>(Acanthocystis turfacea<br>Chlorella virus 1)] [9e-<br>05]                      | N/A                                                                                                                                       | Hypothetical<br>protein                      | 0 | 0 | 0 |
| a055L  | 30008 | 3040<br>3 | 62 | 396  | 131 | 15734 | 8.3  | N/A   | N/A | N/A                                                                               | N/A                                                                                                                                                                                                                  | YP_001426778<br>[hypothetical protein<br>ATCV1_z297R<br>(Acanthocystis turfacea<br>Chlorella virus 1)] [6e-<br>18]                      | N/A                                                                                                                                       | Hypothetical<br>protein                      | 0 | 0 | 0 |
| a056L  | 30289 | 3060<br>3 | 58 | 315  | 104 | 11511 | 11.7 | N/A   | N/A | N/A                                                                               | N/A                                                                                                                                                                                                                  | N/A                                                                                                                                     | N/A                                                                                                                                       | Hypothetical<br>protein                      | 1 | 1 | 1 |
| A058L  | 30976 | 3162<br>3 | 58 | 648  | 215 | 24718 | 4.7  | N/A   | N/A | N/A                                                                               | N/A                                                                                                                                                                                                                  | N/A                                                                                                                                     | N/A                                                                                                                                       | Hypothetical<br>protein                      | 0 | 2 | 0 |
| a057R  | 31034 | 3144<br>7 | 74 | 414  | 137 | 14937 | 11.6 | N/A   | N/A | N/A                                                                               | N/A                                                                                                                                                                                                                  | N/A                                                                                                                                     | N/A                                                                                                                                       | Hypothetical<br>protein                      | 0 | 0 | 0 |
| A057aR | 31650 | 3266<br>6 | 38 | 1017 | 338 | 37918 | 4.1  | N/A   | N/A | N/A                                                                               | N/A                                                                                                                                                                                                                  | N/A                                                                                                                                     | N/A                                                                                                                                       | Hypothetical<br>protein                      | 0 | 0 | 0 |
| a059L  | 31779 | 3200<br>3 | 52 | 225  | 74  | 8442  | 8.2  | N/A   | N/A | N/A                                                                               | N/A                                                                                                                                                                                                                  | N/A                                                                                                                                     | N/A                                                                                                                                       | Hypothetical<br>protein                      | 0 | 0 | 0 |
| A060L  | 32796 | 3350<br>0 | 86 | 705  | 234 | 27189 | 4.9  | Late  | N/A | N/A                                                                               | N/A                                                                                                                                                                                                                  | N/A                                                                                                                                     | N/A                                                                                                                                       | Unknown protein                              | 0 | 0 | 0 |
| A061L  | 33529 | 3415<br>8 | 74 | 630  | 209 | 24425 | 4.7  | Late  | N/A | N/A                                                                               | PF05711.4<br>[Macrocin-O-<br>methyltransferase<br>(TyfF)] [8.9e-20]                                                                                                                                                  | YP_003300173<br>[macrocin-O-<br>methyltransferase<br>domain-containing<br>protein<br>(Thermomonospora<br>curvata DSM 43183)]<br>[9e-31] | N/A                                                                                                                                       | Unknown protein                              | 0 | 0 | 0 |

|        |       |       |    |      |     |       |      |            |     |                                    |                                                                 |                                                                                                     |                                             |                                      |   |   |   |
|--------|-------|-------|----|------|-----|-------|------|------------|-----|------------------------------------|-----------------------------------------------------------------|-----------------------------------------------------------------------------------------------------|---------------------------------------------|--------------------------------------|---|---|---|
| a062R  | 33808 | 34179 | 60 | 372  | 123 | 14812 | 9.6  | N/A        | N/A | N/A                                | N/A                                                             | N/A                                                                                                 | N/A                                         | Hypothetical protein                 | 2 | 2 | 2 |
| a062aR | 34016 | 34198 | 54 | 183  | 60  | 6727  | 8.5  | N/A        | N/A | N/A                                | N/A                                                             | N/A                                                                                                 | N/A                                         | Hypothetical protein                 | 0 | 1 | 1 |
| A063L  | 34191 | 34889 | 96 | 699  | 232 | 27050 | 6.0  | Late       | N/A | N/A                                | N/A                                                             | N/A                                                                                                 | N/A                                         | Unknown protein                      | 0 | 0 | 0 |
| A064R  | 34956 | 36872 | 24 | 1917 | 638 | 74913 | 4.9  | Early-Late | N/A | N/A                                | PF05637.5 [galactosyl transferase GMA12/MNN10 family] [1.2e-10] | ZP_04834875 [conserved hypothetical protein (Prevotella melaninogenica ATCC 25845)] [6e-15]         | N/A                                         | UDP-Glucose glycosyltransferase      | 0 | 0 | 0 |
| a065L  | 35265 | 35510 | 60 | 246  | 81  | 9861  | 7.2  | N/A        | N/A | N/A                                | N/A                                                             | N/A                                                                                                 | N/A                                         | Hypothetical protein                 | 0 | 1 | 0 |
| a066L  | 36607 | 36945 | 70 | 339  | 112 | 13228 | 10.0 | N/A        | N/A | N/A                                | N/A                                                             | N/A                                                                                                 | N/A                                         | Hypothetical protein                 | 1 | 0 | 1 |
| a066aL | 36851 | 36976 | 58 | 126  | 41  | 4846  | 8.0  | N/A        | N/A | N/A                                | N/A                                                             | N/A                                                                                                 | N/A                                         | Hypothetical protein                 | 0 | 0 | 0 |
| A067R  | 37043 | 37972 | 62 | 930  | 309 | 33211 | 3.6  | Early      | N/A | N/A                                | N/A                                                             | N/A                                                                                                 | N/A                                         | Unknown protein                      | 0 | 1 | 0 |
| a068L  | 37375 | 37677 | 66 | 303  | 100 | 9518  | 3.7  | N/A        | N/A | N/A                                | N/A                                                             | N/A                                                                                                 | N/A                                         | Hypothetical protein                 | 0 | 1 | 0 |
| a069L  | 37433 | 37873 | 56 | 441  | 146 | 15049 | 11.8 | N/A        | N/A | N/A                                | N/A                                                             | N/A                                                                                                 | N/A                                         | Hypothetical protein                 | 1 | 1 | 0 |
| a070L  | 37798 | 38064 | 66 | 267  | 88  | 10265 | 9.6  | N/A        | N/A | N/A                                | N/A                                                             | N/A                                                                                                 | N/A                                         | Hypothetical protein                 | 1 | 1 | 1 |
| A071R  | 38003 | 39067 | 80 | 1065 | 354 | 41967 | 7.4  | Early      | N/A | N/A                                | N/A                                                             | ZP_06054798 [TPR repeat-containing protein (alpha proteobacterium HIMB114)] [8e-16]                 | N/A                                         | Unknown protein                      | 0 | 0 | 0 |
| a072L  | 38164 | 38436 | 64 | 273  | 90  | 10264 | 11.8 | N/A        | N/A | N/A                                | N/A                                                             | N/A                                                                                                 | N/A                                         | Hypothetical protein                 | 1 | 1 | 1 |
| a073L  | 38417 | 38626 | 56 | 210  | 69  | 8105  | 7.7  | N/A        | N/A | N/A                                | N/A                                                             | N/A                                                                                                 | N/A                                         | Hypothetical protein                 | 0 | 0 | 0 |
| a074L  | 38660 | 38863 | 74 | 204  | 67  | 8104  | 6.8  | N/A        | N/A | N/A                                | N/A                                                             | N/A                                                                                                 | N/A                                         | Hypothetical protein                 | 0 | 1 | 0 |
| A075L  | 39078 | 39920 | 80 | 843  | 280 | 33254 | 5.4  | Early-Late | N/A | N/A                                | PF03016.8 [Exostosin family] [5.5e-09]                          | YP_001425644 [hypothetical protein FR483_N012L (Paramecium bursaria Chlorella virus FR483)] [3e-58] | N/A                                         | Unknown protein                      | 0 | 0 | 0 |
| a075aR | 39784 | 39933 | 60 | 150  | 49  | 5568  | 9.2  | N/A        | N/A | N/A                                | N/A                                                             | N/A                                                                                                 | N/A                                         | Hypothetical protein                 | 0 | 0 | 0 |
| A075bL | 39950 | 40138 | 80 | 189  | 62  | 7489  | 4.7  | N/A        | N/A | N/A                                | N/A                                                             | N/A                                                                                                 | N/A                                         | Hypothetical protein                 | 0 | 0 | 0 |
| A075cR | 40014 | 40172 | 70 | 159  | 52  | 5931  | 9.8  | N/A        | N/A | N/A                                | N/A                                                             | N/A                                                                                                 | N/A                                         | Hypothetical protein                 | 0 | 1 | 1 |
| A076L  | 40190 | 40501 | 50 | 312  | 103 | 12094 | 11.7 | N/A        | N/A | N/A                                | N/A                                                             | N/A                                                                                                 | N/A                                         | Hypothetical protein                 | 0 | 1 | 0 |
| A077L  | 40470 | 40745 | 76 | 276  | 91  | 10180 | 5.0  | Early      | N/A | N/A                                | N/A                                                             | N/A                                                                                                 | N/A                                         | Unknown protein                      | 1 | 1 | 1 |
| A078R  | 40863 | 41759 | 74 | 897  | 298 | 33179 | 5.7  | Early      | N/A | COG0388 [Predicted amidohydrolase] | PF00795.15 [Carbon-nitrogen hydrolase] [5.5e-                   | YP_001425727 [hypothetical protein FR483_N095L                                                      | Q3HVN1 [RecName: FullIN-carbamoylputrescine | N-carbamoylputrescine amidohydrolase | 0 | 2 | 0 |

|               |       |           |    |      |     |       |      |       |     | [7e-06] | 34]                                                                     | (Paramecium bursaria<br>Chlorella virus FR483)<br>[1e-113]                                                         | amidase] [2e-73]                                                                                                                                             |                          |   |   |   |
|---------------|-------|-----------|----|------|-----|-------|------|-------|-----|---------|-------------------------------------------------------------------------|--------------------------------------------------------------------------------------------------------------------|--------------------------------------------------------------------------------------------------------------------------------------------------------------|--------------------------|---|---|---|
| <b>A078aL</b> | 41756 | 4187<br>8 | 92 | 123  | 40  | 4848  | 10.6 | N/A   | N/A | N/A     | N/A                                                                     | N/A                                                                                                                | N/A                                                                                                                                                          | Hypothetical<br>protein  | 0 | 0 | 0 |
| <b>A078bR</b> | 42007 | 4218<br>3 | 52 | 177  | 58  | 6943  | 10.5 | N/A   | N/A | N/A     | N/A                                                                     | N/A                                                                                                                | N/A                                                                                                                                                          | Hypothetical<br>protein  | 0 | 0 | 0 |
| <b>a078cL</b> | 42431 | 4256<br>5 | 62 | 135  | 44  | 5301  | 9.8  | N/A   | N/A | N/A     | N/A                                                                     | N/A                                                                                                                | N/A                                                                                                                                                          | Hypothetical<br>protein  | 1 | 1 | 0 |
| <b>A079R</b>  | 42467 | 4319<br>5 | 80 | 729  | 242 | 27092 | 9.3  | Early | N/A | N/A     | PF07150.4<br>[Protein of<br>unknown function<br>(DUF1390)]<br>[5.4e-78] | YP_001425662<br>[hypothetical protein<br>FR483_N030R<br>(Paramecium bursaria<br>Chlorella virus FR483)]<br>[5e-29] | N/A                                                                                                                                                          | Unknown protein          | 0 | 0 | 0 |
| <b>a080L</b>  | 42638 | 4304<br>5 | 58 | 408  | 135 | 16179 | 10.2 | N/A   | N/A | N/A     | N/A                                                                     | N/A                                                                                                                | N/A                                                                                                                                                          | Hypothetical<br>protein  | 0 | 2 | 0 |
| <b>A081L</b>  | 43192 | 4376<br>1 | 76 | 570  | 189 | 21916 | 9.0  | Early | N/A | N/A     | N/A                                                                     | YP_001425639<br>[hypothetical protein<br>FR483_N007L<br>(Paramecium bursaria<br>Chlorella virus FR483)]<br>[5e-23] | N/A                                                                                                                                                          | Unknown protein          | 0 | 0 | 0 |
| <b>a082R</b>  | 43760 | 4397<br>5 | 60 | 216  | 71  | 8434  | 6.5  | N/A   | N/A | N/A     | N/A                                                                     | N/A                                                                                                                | N/A                                                                                                                                                          | Hypothetical<br>protein  | 0 | 0 | 0 |
| <b>a083R</b>  | 43791 | 4406<br>3 | 4  | 273  | 90  | 9976  | 10.4 | N/A   | N/A | N/A     | N/A                                                                     | N/A                                                                                                                | N/A                                                                                                                                                          | Hypothetical<br>protein  | 0 | 1 | 0 |
| <b>A084L</b>  | 43811 | 4437<br>7 | 76 | 567  | 188 | 22309 | 7.0  | Early | N/A | N/A     | N/A                                                                     | YP_001425642<br>[hypothetical protein<br>FR483_N010L<br>(Paramecium bursaria<br>Chlorella virus FR483)]<br>[7e-11] | N/A                                                                                                                                                          | Unknown protein          | 0 | 0 | 0 |
| <b>a084aL</b> | 44458 | 4458<br>0 | 46 | 123  | 40  | 4742  | 9.2  | N/A   | N/A | N/A     | N/A                                                                     | N/A                                                                                                                | N/A                                                                                                                                                          | Hypothetical<br>protein  | 1 | 1 | 1 |
| <b>A085R</b>  | 44498 | 4522<br>6 | 66 | 729  | 242 | 27812 | 7.8  | Late  | Yes | N/A     | PF03171.13<br>[2OG-Fe(II)<br>oxygenase<br>superfamily]<br>[3.5e-11]     | YP_001426050<br>[hypothetical protein<br>FR483_N418R<br>(Paramecium bursaria<br>Chlorella virus FR483)]<br>[7e-56] | Q5UP57 [RecName:<br>FullPutative prolyl 4-<br>hydroxylase Short4-<br>PH AltName:<br>FullProcollagen-<br>proline2-oxoglutarate-<br>4-dioxygenase] [2e-<br>14] | Prolyl 4-<br>hydroxylase | 1 | 1 | 1 |
| <b>a086L</b>  | 44953 | 4519<br>5 | 60 | 243  | 80  | 8487  | 10.2 | N/A   | N/A | N/A     | N/A                                                                     | N/A                                                                                                                | N/A                                                                                                                                                          | Hypothetical<br>protein  | 0 | 1 | 0 |
| <b>a086aL</b> | 45101 | 4522<br>9 | 54 | 129  | 42  | 5047  | 10.1 | N/A   | N/A | N/A     | N/A                                                                     | N/A                                                                                                                | N/A                                                                                                                                                          | Hypothetical<br>protein  | 0 | 0 | 0 |
| <b>A087R</b>  | 45223 | 4662<br>3 | 32 | 1401 | 466 | 53644 | 8.5  | Early | N/A | N/A     | PF01844.16<br>[HNH<br>endonuclease]<br>[6.1e-13]                        | YP_001426447<br>[hypothetical protein<br>FR483_N815L<br>(Paramecium bursaria<br>Chlorella virus FR483)]<br>[4e-07] | N/A                                                                                                                                                          | Unknown protein          | 0 | 1 | 0 |
| <b>a086bL</b> | 46489 | 4663<br>2 | 72 | 144  | 47  | 5602  | 9.0  | N/A   | N/A | N/A     | N/A                                                                     | N/A                                                                                                                | N/A                                                                                                                                                          | Hypothetical<br>protein  | 0 | 1 | 0 |
| <b>a086cL</b> | 46508 | 4663<br>9 | 14 | 132  | 43  | 4980  | 4.2  | N/A   | N/A | N/A     | N/A                                                                     | N/A                                                                                                                | N/A                                                                                                                                                          | Hypothetical<br>protein  | 0 | 0 | 0 |
| <b>A088R</b>  | 46755 | 4752<br>8 | 72 | 774  | 257 | 29442 | 5.0  | Early | N/A | N/A     | N/A                                                                     | YP_001426459<br>[hypothetical protein]                                                                             | N/A                                                                                                                                                          | Unknown protein          | 0 | 0 | 0 |

|                |       |           |    |      |     |       |      |                |     |                                                                                                                                               |                                                                                                                     |                                                                                                                     |                                                                                                                                                                                                      |                                                        |   |   |   |  |
|----------------|-------|-----------|----|------|-----|-------|------|----------------|-----|-----------------------------------------------------------------------------------------------------------------------------------------------|---------------------------------------------------------------------------------------------------------------------|---------------------------------------------------------------------------------------------------------------------|------------------------------------------------------------------------------------------------------------------------------------------------------------------------------------------------------|--------------------------------------------------------|---|---|---|--|
|                |       |           |    |      |     |       |      |                |     |                                                                                                                                               |                                                                                                                     | FR483_N827R<br>(Paramecium bursaria<br>Chlorella virus FR483)<br>[7e-07]                                            |                                                                                                                                                                                                      |                                                        |   |   |   |  |
| A089R          | 47628 | 4783<br>4 | 78 | 207  | 68  | 7634  | 10.6 | Early-<br>Late | N/A | N/A                                                                                                                                           | N/A                                                                                                                 | YP_001426713<br>[hypothetical protein<br>ATCV1_Z232L<br>(Acanthocystis turfacea<br>Chlorella virus 1)] [2e-<br>14]  | N/A                                                                                                                                                                                                  | Unknown protein                                        | 0 | 0 | 0 |  |
| a089aL         | 47826 | 4797<br>2 | 76 | 147  | 48  | 5538  | 8.5  | N/A            | N/A | N/A                                                                                                                                           | N/A                                                                                                                 | N/A                                                                                                                 | Hypothetical<br>protein                                                                                                                                                                              | 0                                                      | 1 | 0 |   |  |
| A090R          | 47851 | 4831<br>5 | 70 | 465  | 154 | 18442 | 4.9  | Early-<br>Late | N/A | N/A                                                                                                                                           | N/A                                                                                                                 | N/A                                                                                                                 | N/A                                                                                                                                                                                                  | Unknown protein                                        | 0 | 0 | 0 |  |
| A092/093L      | 48326 | 4962<br>7 | 72 | 1302 | 433 | 49577 | 10.7 | Early-<br>Late | Yes | N/A                                                                                                                                           | PF08789.3<br>[PBCV-specific<br>basic adaptor<br>domain] [1.2e-15]                                                   | YP_001427042<br>[hypothetical protein<br>ATCV1_Z561L<br>(Acanthocystis turfacea<br>Chlorella virus 1)] [2e-<br>90]  | N/A                                                                                                                                                                                                  | Unknown protein                                        | 0 | 0 | 0 |  |
| a092/093a<br>L | 48547 | 4873<br>2 | 68 | 186  | 61  | 7472  | 11.8 | N/A            | N/A | N/A                                                                                                                                           | N/A                                                                                                                 | N/A                                                                                                                 | Hypothetical<br>protein                                                                                                                                                                              | 0                                                      | 0 | 0 |   |  |
| A094L          | 49662 | 5075<br>6 | 74 | 1095 | 364 | 40734 | 4.3  | Early          | N/A | COG2273 [Beta-<br>glucanase/Beta-<br>glucan<br>synthetase] [4e-<br>06]                                                                        | PF00722.14<br>[Glycosyl<br>hydrolases family<br>16] [7.5e-13]                                                       | YP_001425751<br>[hypothetical protein<br>FR483_N119L<br>(Paramecium bursaria<br>Chlorella virus FR483)]<br>[1e-110] | P23903 [RecName:<br>FullGlucan endo-13-<br>beta-glucosidase A1<br>AltName: Full(1->3)-<br>beta-glucan<br>endohydrolase<br>AltName: Full(1->3)-<br>beta-glucanase A1<br>Flags: Precursor] [1e-<br>22] | beta-1-3-glucanase                                     | 1 | 1 | 1 |  |
| a095R          | 50014 | 5023<br>2 | 52 | 219  | 72  | 7701  | 10.3 | N/A            | N/A | N/A                                                                                                                                           | N/A                                                                                                                 | N/A                                                                                                                 | N/A                                                                                                                                                                                                  | Hypothetical<br>protein                                | 0 | 0 | 0 |  |
| a096R          | 50346 | 5054<br>9 | 68 | 204  | 67  | 7873  | 12.0 | N/A            | N/A | N/A                                                                                                                                           | N/A                                                                                                                 | N/A                                                                                                                 | N/A                                                                                                                                                                                                  | Hypothetical<br>protein                                | 0 | 1 | 0 |  |
| a097R          | 50678 | 5089<br>3 | 68 | 216  | 71  | 8581  | 9.9  | N/A            | N/A | N/A                                                                                                                                           | N/A                                                                                                                 | N/A                                                                                                                 | N/A                                                                                                                                                                                                  | Hypothetical<br>protein                                | 1 | 1 | 1 |  |
| A098R          | 50886 | 5259<br>2 | 76 | 1707 | 568 | 65159 | 8.2  | Early          | N/A | COG1215<br>[Glycosyltransfer<br>ases probably<br>involved in cell<br>wall biogenesis]<br>[4e-06]                                              | PF03142.8<br>[Chitin synthase]<br>[4.4e-09]                                                                         | YP_001425756<br>[hypothetical protein<br>FR483_N124R<br>(Paramecium bursaria<br>Chlorella virus FR483)]<br>[0.0]    | B1WB39 [RecName:<br>FullHyaluronan<br>synthase 1 AltName:<br>FullHyaluronate<br>synthase 1 AltName:<br>FullHyaluronic acid<br>synthase 1 ShortHA<br>synthase 1] [1e-56]                              | Hyaluronan<br>synthase                                 | 7 | 8 | 7 |  |
| a099L          | 52152 | 5239<br>4 | 62 | 243  | 80  | 8644  | 9.6  | N/A            | N/A | N/A                                                                                                                                           | N/A                                                                                                                 | N/A                                                                                                                 | N/A                                                                                                                                                                                                  | Hypothetical<br>protein                                | 0 | 0 | 0 |  |
| a099aL         | 52539 | 5268<br>2 | 60 | 144  | 47  | 5250  | 6.5  | N/A            | N/A | N/A                                                                                                                                           | N/A                                                                                                                 | N/A                                                                                                                 | N/A                                                                                                                                                                                                  | Hypothetical<br>protein                                | 0 | 0 | 0 |  |
| A100R          | 52691 | 5447<br>8 | 60 | 1788 | 595 | 65408 | 6.1  | Early          | N/A | COG0449<br>[Glucosamine 6-<br>phosphate<br>synthetase<br>contains<br>amidotransferase<br>and<br>phosphosugar<br>isomerase<br>domains] [8e-07] | PF00310.14<br>[Glutamine<br>amidotransferase<br>s class-II] [5.6e-<br>15] / PF01380.15<br>[SIS domain]<br>[2.2e-26] | YP_001425667<br>[hypothetical protein<br>FR483_N035R<br>(Paramecium bursaria<br>Chlorella virus FR483)]<br>[0.0]    | Q7WE36 [RecName:<br>FullGlucosamine--<br>fructose-6-phosphate<br>aminotransferase<br>(isomerizing)] [1e-<br>153]                                                                                     | Glutamine:fructose<br>-6-phosphate<br>amidotransferase | 0 | 0 | 0 |  |

|           |       |           |    |      |     |       |      |       |     |                                                                           |                                                                                                                           |                                                                                                     |                                                                                                                                                                                                                                                           |                          |   |   |   |
|-----------|-------|-----------|----|------|-----|-------|------|-------|-----|---------------------------------------------------------------------------|---------------------------------------------------------------------------------------------------------------------------|-----------------------------------------------------------------------------------------------------|-----------------------------------------------------------------------------------------------------------------------------------------------------------------------------------------------------------------------------------------------------------|--------------------------|---|---|---|
| a101L     | 52925 | 5318<br>8 | 54 | 264  | 87  | 10061 | 8.1  | N/A   | N/A | N/A                                                                       | N/A                                                                                                                       | N/A                                                                                                 | N/A                                                                                                                                                                                                                                                       | Hypothetical protein     | 0 | 0 | 0 |
| a102L     | 54468 | 5497<br>4 | 56 | 507  | 168 | 19199 | 11.6 | N/A   | N/A | N/A                                                                       | N/A                                                                                                                       | N/A                                                                                                 | N/A                                                                                                                                                                                                                                                       | Hypothetical protein     | 1 | 2 | 1 |
| A103R     | 54622 | 5561<br>4 | 84 | 993  | 330 | 37832 | 8.4  | Early | N/A | COG5226 [mRNA capping enzyme guanylyltransferase (alpha) subunit] [4e-13] | PF01331.12 [mRNA capping enzyme catalytic domain] [2.1e-50] / PF03919.8 [mRNA capping enzyme C-terminal domain] [7.8e-15] | YP_001427200 [hypothetical protein ATCV1_Z719L (Acanthocystis turfacea Chlorella virus 1)] [2e-90]  | P78587 [RecName: FullmRNA-capping enzyme subunit alpha AltName: FullmRNA guanylyltransferase AltName: FullGTP--RNA guanylyltransferase ShortGTase] [7e-16]                                                                                                | mRNA guanylyltransferase | 0 | 3 | 0 |
| a104L     | 55054 | 5534<br>4 | 58 | 291  | 96  | 10912 | 7.2  | N/A   | N/A | N/A                                                                       | N/A                                                                                                                       | N/A                                                                                                 | N/A                                                                                                                                                                                                                                                       | Hypothetical protein     | 0 | 0 | 0 |
| A105L     | 55626 | 5648<br>0 | 84 | 855  | 284 | 33063 | 6.8  | Early | N/A | N/A                                                                       | PF00443.22 [Ubiquitin carboxyl-terminal hydrolase] [5.7e-25]                                                              | YP_001425764 [hypothetical protein FR483_N132L (Paramecium bursaria Chlorella virus FR483)] [8e-70] | P40818 [RecName: FullUbiquitin carboxyl-terminal hydrolase 8 AltName: FullUbiquitin thioesterase 8 AltName: FullUbiquitin-specific-processing protease 8 AltName: FullDeubiquitinating enzyme 8 AltName: FullUbiquitin isopeptidase Y ShorthUBPy] [3e-09] | Unknown protein          | 0 | 0 | 0 |
| a106R     | 55770 | 5616<br>8 | 56 | 399  | 132 | 15709 | 9.0  | N/A   | N/A | N/A                                                                       | N/A                                                                                                                       | N/A                                                                                                 | N/A                                                                                                                                                                                                                                                       | Hypothetical protein     | 0 | 0 | 0 |
| A107L     | 56516 | 5738<br>8 | 80 | 873  | 290 | 32511 | 6.2  | Early | N/A | N/A                                                                       | PF00382.12 [Transcription factor TFIIIB repeat] [4.6e-06]                                                                 | YP_001425767 [hypothetical protein FR483_N135L (Paramecium bursaria Chlorella virus FR483)] [2e-57] | Q9SS44 [RecName: FullTranscription initiation factor IIB-2 AltName: FullGeneral transcription factor TFIIIB-2 ShortATFIIB2] [4e-10]                                                                                                                       | Unknown protein          | 0 | 0 | 0 |
| a108R     | 56933 | 5714<br>8 | 60 | 216  | 71  | 8190  | 8.8  | N/A   | N/A | N/A                                                                       | N/A                                                                                                                       | N/A                                                                                                 | N/A                                                                                                                                                                                                                                                       | Hypothetical protein     | 0 | 0 | 0 |
| A108aR    | 57212 | 5740<br>0 | 52 | 189  | 62  | 7278  | 9.0  | N/A   | N/A | N/A                                                                       | N/A                                                                                                                       | N/A                                                                                                 | N/A                                                                                                                                                                                                                                                       | Hypothetical protein     | 0 | 0 | 0 |
| A108bL    | 57471 | 5797<br>7 | 84 | 507  | 168 | 19692 | 7.1  | N/A   | N/A | N/A                                                                       | PF01541.17 [GIY-YIG catalytic domain] [1.9e-06]                                                                           | YP_001427194 [hypothetical protein ATCV1_Z713L (Acanthocystis turfacea Chlorella virus 1)] [1e-54]  | N/A                                                                                                                                                                                                                                                       | Hypothetical protein     | 0 | 0 | 0 |
| a110L     | 58082 | 5839<br>0 | 50 | 309  | 102 | 11775 | 10.2 | N/A   | N/A | N/A                                                                       | N/A                                                                                                                       | N/A                                                                                                 | N/A                                                                                                                                                                                                                                                       | Hypothetical protein     | 0 | 0 | 0 |
| A111/114R | 58098 | 6068<br>0 | 80 | 2583 | 860 | 98045 | 6.6  | Early | N/A | N/A                                                                       | PF00852.12 [Glycosyltransferase family 10 (fucosyltransferase)] [1.4e-06]                                                 | YP_001426104 [hypothetical protein FR483_N472R (Paramecium bursaria Chlorella virus FR483)] [0.0]   | N/A                                                                                                                                                                                                                                                       | Unknown protein          | 0 | 0 | 0 |
| a112L     | 58775 | 5906<br>8 | 42 | 294  | 97  | 10605 | 9.2  | N/A   | N/A | N/A                                                                       | N/A                                                                                                                       | YP_001426602 [hypothetical protein ATCV1_z121L (Acanthocystis turfacea                              | N/A                                                                                                                                                                                                                                                       | Hypothetical protein     | 1 | 2 | 1 |



|               |       |       |    |      |     |       |      |            |     |     |                                                   |                                                                                                     |                                                                                           |                      |   |   |   |
|---------------|-------|-------|----|------|-----|-------|------|------------|-----|-----|---------------------------------------------------|-----------------------------------------------------------------------------------------------------|-------------------------------------------------------------------------------------------|----------------------|---|---|---|
| <b>a126R</b>  | 66620 | 66820 | 24 | 201  | 66  | 7964  | 11.8 | N/A        | N/A | N/A | N/A                                               | N/A                                                                                                 | N/A                                                                                       | Hypothetical protein | 0 | 2 | 2 |
| <b>A127R</b>  | 67154 | 67891 | 14 | 738  | 245 | 27126 | 10.1 | Late       | Yes | N/A | N/A                                               | YP_001425800 [hypothetical protein FR483_N168R (Paramecium bursaria Chlorella virus FR483)] [1e-76] | N/A                                                                                       | Unknown protein      | 0 | 0 | 0 |
| <b>a128L</b>  | 67510 | 67770 | 56 | 261  | 86  | 9678  | 4.8  | N/A        | N/A | N/A | N/A                                               | N/A                                                                                                 | N/A                                                                                       | Hypothetical protein | 1 | 1 | 1 |
| <b>A129R</b>  | 67952 | 69028 | 82 | 1077 | 358 | 40533 | 8.4  | Early-Late | N/A | N/A | N/A                                               | YP_001425778 [hypothetical protein FR483_N146R (Paramecium bursaria Chlorella virus FR483)] [8e-69] | N/A                                                                                       | Unknown protein      | 0 | 0 | 0 |
| <b>A130R</b>  | 69049 | 69366 | 84 | 318  | 105 | 11644 | 10.0 | Early-Late | N/A | N/A | N/A                                               | YP_001426755 [hypothetical protein ATCV1_Z274R (Acanthocystis turfacea Chlorella virus 1)] [3e-24]  | N/A                                                                                       | Unknown protein      | 4 | 3 | 3 |
| <b>A130aR</b> | 69261 | 69404 | 62 | 144  | 47  | 5585  | 8.8  | N/A        | N/A | N/A | N/A                                               | N/A                                                                                                 | N/A                                                                                       | Hypothetical protein | 0 | 0 | 0 |
| <b>a130bR</b> | 69344 | 69475 | 58 | 132  | 43  | 5215  | 10.8 | N/A        | N/A | N/A | N/A                                               | N/A                                                                                                 | N/A                                                                                       | Hypothetical protein | 0 | 0 | 0 |
| <b>A131L</b>  | 69359 | 69769 | 68 | 411  | 136 | 16124 | 4.6  | Early      | N/A | N/A | N/A                                               | YP_001426009 [hypothetical protein FR483_N377L (Paramecium bursaria Chlorella virus FR483)] [4e-06] | N/A                                                                                       | Unknown protein      | 0 | 0 | 0 |
| <b>a132R</b>  | 69533 | 69805 | 54 | 273  | 90  | 10395 | 5.5  | N/A        | N/A | N/A | N/A                                               | N/A                                                                                                 | N/A                                                                                       | Hypothetical protein | 0 | 1 | 1 |
| <b>A133R</b>  | 69960 | 70583 | 86 | 624  | 207 | 23480 | 9.6  | Early      | N/A | N/A | PF11264.1 [Thylakoid formation protein] [4.8e-52] | XP_001693657 [inositol phosphatase-like protein (Chlamydomonas reinhardtii)] [1e-24]                | Q84PB7 [RecName: FullProtein THYLAKOID FORMATION1 chloroplastic Flags: Precursor] [5e-23] | Unknown protein      | 0 | 1 | 0 |
| <b>A134L</b>  | 70558 | 71055 | 92 | 498  | 165 | 19545 | 9.9  | Early-Late | N/A | N/A | PF01541.17 [GIY-YIG catalytic domain] [1.8e-11]   | YP_001425818 [hypothetical protein FR483_N186L (Paramecium bursaria Chlorella virus FR483)] [2e-23] | N/A                                                                                       | Unknown protein      | 0 | 0 | 0 |
| <b>A135L</b>  | 71055 | 71603 | 74 | 549  | 182 | 20728 | 8.4  | Late       | N/A | N/A | N/A                                               | N/A                                                                                                 | N/A                                                                                       | Unknown protein      | 5 | 5 | 5 |
| <b>A136R</b>  | 71134 | 71574 | 30 | 441  | 146 | 16367 | 11.5 | N/A        | Yes | N/A | N/A                                               | YP_001425749 [hypothetical protein FR483_N117R (Paramecium bursaria Chlorella virus FR483)] [6e-07] | N/A                                                                                       | Unknown protein      | 0 | 0 | 0 |
| <b>A137R</b>  | 71625 | 71843 | 44 | 219  | 72  | 8777  | 10.9 | Early      | N/A | N/A | N/A                                               | YP_001427214 [hypothetical protein ATCV1_z733L (Acanthocystis turfacea Chlorella virus 1)] [2e-07]  | N/A                                                                                       | Unknown protein      | 0 | 0 | 0 |
| <b>A138R</b>  | 71880 | 72701 | 84 | 822  | 273 | 31471 | 4.4  | Early-Late | N/A | N/A | N/A                                               | N/A                                                                                                 | N/A                                                                                       | Unknown protein      | 0 | 0 | 0 |



|           |       |           |    |      |      |       |      |                |     |                                                                   |                                                                        |                                                                                                                     |                                                                                      |                      |   |   |   |
|-----------|-------|-----------|----|------|------|-------|------|----------------|-----|-------------------------------------------------------------------|------------------------------------------------------------------------|---------------------------------------------------------------------------------------------------------------------|--------------------------------------------------------------------------------------|----------------------|---|---|---|
| a138aR    | 72604 | 7274<br>7 | 72 | 144  | 47   | 5766  | 9.4  | N/A            | N/A | N/A                                                               | N/A                                                                    | N/A                                                                                                                 | N/A                                                                                  | Hypothetical protein | 0 | 0 | 0 |
| A139L     | 72698 | 7315<br>3 | 60 | 456  | 151  | 17701 | 8.4  | Late           | Yes | N/A                                                               | N/A                                                                    | YP_001425821<br>[hypothetical protein<br>FR483_N189L<br>(Paramecium bursaria<br>Chlorella virus FR483)]<br>[6e-24]  | N/A                                                                                  | Unknown protein      | 2 | 2 | 2 |
| A140/145R | 73107 | 7649<br>0 | 90 | 3384 | 1127 | ####  | 11.0 | Early-<br>Late | Yes | N/A                                                               | N/A                                                                    | YP_001425827<br>[hypothetical protein<br>FR483_N195R<br>(Paramecium bursaria<br>Chlorella virus FR483)]<br>[0.0]    | N/A                                                                                  | Unknown protein      | 0 | 1 | 0 |
| a144L     | 74244 | 7574<br>0 | 64 | 1497 | 498  | 57630 | 8.5  | N/A            | N/A | N/A                                                               | N/A                                                                    | N/A                                                                                                                 | N/A                                                                                  | Hypothetical protein | 0 | 4 | 4 |
| a142L     | 74474 | 7487<br>5 | 48 | 402  | 133  | 13511 | 8.7  | N/A            | N/A | N/A                                                               | N/A                                                                    | N/A                                                                                                                 | N/A                                                                                  | Hypothetical protein | 4 | 4 | 4 |
| a146L     | 75752 | 7600<br>6 | 68 | 255  | 84   | 8946  | 3.5  | N/A            | N/A | N/A                                                               | N/A                                                                    | N/A                                                                                                                 | N/A                                                                                  | Hypothetical protein | 2 | 2 | 2 |
| a147L     | 75882 | 7665<br>5 | 56 | 774  | 257  | 29267 | 8.6  | N/A            | N/A | N/A                                                               | N/A                                                                    | N/A                                                                                                                 | N/A                                                                                  | Hypothetical protein | 0 | 5 | 1 |
| A148R     | 76540 | 7687<br>2 | 82 | 333  | 110  | 11990 | 9.8  | Late           | N/A | N/A                                                               | N/A                                                                    | N/A                                                                                                                 | N/A                                                                                  | Unknown protein      | 0 | 0 | 0 |
| a149L     | 76642 | 7705<br>2 | 62 | 411  | 136  | 16083 | 11.7 | N/A            | N/A | N/A                                                               | N/A                                                                    | N/A                                                                                                                 | N/A                                                                                  | Hypothetical protein | 0 | 1 | 0 |
| A150L     | 76856 | 7731<br>4 | 74 | 459  | 152  | 17089 | 4.1  | Early          | N/A | N/A                                                               | N/A                                                                    | YP_001425837<br>[hypothetical protein<br>FR483_N205L<br>(Paramecium bursaria<br>Chlorella virus FR483)]<br>[4e-11]  | N/A                                                                                  | Unknown protein      | 0 | 0 | 0 |
| A151R     | 77397 | 7780<br>4 | 52 | 408  | 135  | 15099 | 8.3  | Early          | N/A | N/A                                                               | N/A                                                                    | N/A                                                                                                                 | N/A                                                                                  | Unknown protein      | 0 | 0 | 0 |
| a152L     | 77822 | 7809<br>4 | 58 | 273  | 90   | 10135 | 11.1 | N/A            | N/A | N/A                                                               | N/A                                                                    | N/A                                                                                                                 | N/A                                                                                  | Hypothetical protein | 0 | 1 | 1 |
| A153R     | 77880 | 7925<br>9 | 80 | 1380 | 459  | 51301 | 9.2  | Early-<br>Late | N/A | COG1061 [DNA<br>or RNA helicases<br>of superfamily II]<br>[2e-06] | PF04851.8 [Type<br>III restriction<br>enzyme res<br>subunit] [5.5e-15] | YP_001425838<br>[hypothetical protein<br>FR483_N206R<br>(Paramecium bursaria<br>Chlorella virus FR483)]<br>[1e-176] | Q5UQ46 [RecName:<br>FullPutative ATP-<br>dependent RNA<br>helicase L396] [1e-<br>46] | Unknown protein      | 0 | 0 | 0 |
| A154L     | 79256 | 8029<br>9 | 70 | 1044 | 347  | 38950 | 8.4  | Early-<br>Late | N/A | N/A                                                               | N/A                                                                    | YP_001425778<br>[hypothetical protein<br>FR483_N146R<br>(Paramecium bursaria<br>Chlorella virus FR483)]<br>[5e-65]  | N/A                                                                                  | Unknown protein      | 0 | 0 | 0 |
| a155R     | 79412 | 7969<br>6 | 52 | 285  | 94   | 11209 | 10.8 | N/A            | N/A | N/A                                                               | N/A                                                                    | N/A                                                                                                                 | N/A                                                                                  | Hypothetical protein | 0 | 0 | 0 |
| a156L     | 79885 | 8021<br>7 | 52 | 333  | 110  | 12610 | 11.9 | N/A            | N/A | N/A                                                               | N/A                                                                    | N/A                                                                                                                 | N/A                                                                                  | Hypothetical protein | 0 | 0 | 0 |
| A157L     | 80393 | 8072<br>5 | 80 | 333  | 110  | 12328 | 3.9  | Early-<br>Late | Yes | N/A                                                               | N/A                                                                    | YP_001425841<br>[hypothetical protein<br>FR483_N209L<br>(Paramecium bursaria<br>Chlorella virus FR483)]<br>[2e-16]  | N/A                                                                                  | Unknown protein      | 1 | 1 | 1 |

|        |       |       |    |      |     |       |      |            |     |                                                  |                                                                                                                                                          |                                                                                                     |                                                                                                                                                       |                            |   |   |   |
|--------|-------|-------|----|------|-----|-------|------|------------|-----|--------------------------------------------------|----------------------------------------------------------------------------------------------------------------------------------------------------------|-----------------------------------------------------------------------------------------------------|-------------------------------------------------------------------------------------------------------------------------------------------------------|----------------------------|---|---|---|
| A158L  | 80770 | 81084 | 68 | 315  | 104 | 12162 | 3.3  | Early      | N/A | N/A                                              | N/A                                                                                                                                                      | N/A                                                                                                 | N/A                                                                                                                                                   | Unknown protein            | 0 | 0 | 0 |
| A159R  | 81104 | 81436 | 36 | 333  | 110 | 12869 | 8.7  | N/A        | N/A | N/A                                              | N/A                                                                                                                                                      | N/A                                                                                                 | N/A                                                                                                                                                   | Hypothetical protein       | 1 | 1 | 1 |
| a160L  | 81257 | 81751 | 68 | 495  | 164 | 17774 | 10.6 | N/A        | N/A | N/A                                              | N/A                                                                                                                                                      | N/A                                                                                                 | N/A                                                                                                                                                   | Hypothetical protein       | 4 | 4 | 4 |
| A161R  | 81345 | 81716 | 58 | 372  | 123 | 13383 | 11.0 | Early      | N/A | N/A                                              | N/A                                                                                                                                                      | N/A                                                                                                 | N/A                                                                                                                                                   | Unknown protein            | 0 | 0 | 0 |
| A162L  | 81717 | 82952 | 78 | 1236 | 411 | 46696 | 4.4  | Early-Late | N/A | N/A                                              | N/A                                                                                                                                                      | N/A                                                                                                 | N/A                                                                                                                                                   | Unknown protein            | 3 | 3 | 3 |
| a162aR | 82831 | 82959 | 68 | 129  | 42  | 4676  | 7.0  | N/A        | N/A | N/A                                              | N/A                                                                                                                                                      | N/A                                                                                                 | N/A                                                                                                                                                   | Hypothetical protein       | 0 | 1 | 0 |
| A163R  | 82995 | 84296 | 12 | 1302 | 433 | 48956 | 7.0  | Early-Late | N/A | N/A                                              | PF00060.19 [Ligand-gated ion channel] [1.8e-09]                                                                                                          | N/A                                                                                                 | N/A                                                                                                                                                   | Unknown protein            | 3 | 3 | 3 |
| a164L  | 83873 | 84277 | 80 | 405  | 134 | 15629 | 9.7  | N/A        | N/A | N/A                                              | N/A                                                                                                                                                      | N/A                                                                                                 | N/A                                                                                                                                                   | Hypothetical protein       | 0 | 3 | 1 |
| A164aR | 84314 | 84493 | 14 | 180  | 59  | 7094  | 5.8  | N/A        | Yes | N/A                                              | N/A                                                                                                                                                      | N/A                                                                                                 | N/A                                                                                                                                                   | Unknown protein            | 1 | 0 | 0 |
| A165L  | 84486 | 84935 | 60 | 450  | 149 | 17251 | 6.8  | Early-Late | N/A | N/A                                              | N/A                                                                                                                                                      | YP_001425846 [hypothetical protein FR483_N214L (Paramecium bursaria Chlorella virus FR483)] [7e-12] | N/A                                                                                                                                                   | Unknown protein            | 0 | 0 | 1 |
| A165aL | 84835 | 85326 | 70 | 492  | 163 | 19024 | 10.1 | N/A        | Yes | N/A                                              | N/A                                                                                                                                                      | YP_001425848 [hypothetical protein FR483_N216L (Paramecium bursaria Chlorella virus FR483)] [3e-18] | N/A                                                                                                                                                   | Unknown protein            | 0 | 0 | 0 |
| A166R  | 85431 | 86237 | 80 | 807  | 268 | 31183 | 4.7  | Early-Late | N/A | N/A                                              | PF09588.3 [YqaJ-like viral recombinase domain] [7.9e-24]                                                                                                 | YP_001425850 [hypothetical protein FR483_N218R (Paramecium bursaria Chlorella virus FR483)] [1e-81] | Q5UQV1 [RecName: FullUncharacterized protein R354] [5e-12]                                                                                            | Unknown protein            | 0 | 0 | 0 |
| a167L  | 85677 | 85880 | 64 | 204  | 67  | 8077  | 8.7  | N/A        | N/A | N/A                                              | N/A                                                                                                                                                      | N/A                                                                                                 | N/A                                                                                                                                                   | Hypothetical protein       | 0 | 0 | 0 |
| a167aR | 86128 | 86283 | 68 | 156  | 51  | 6043  | 10.4 | N/A        | N/A | N/A                                              | N/A                                                                                                                                                      | N/A                                                                                                 | N/A                                                                                                                                                   | Hypothetical protein       | 0 | 0 | 0 |
| A168R  | 86276 | 86776 | 86 | 501  | 166 | 18317 | 4.6  | Late       | Yes | N/A                                              | N/A                                                                                                                                                      | YP_001427100 [hypothetical protein ATCV1_Z619L (Acanthocystis turfacea Chlorella virus 1)] [3e-19]  | N/A                                                                                                                                                   | Unknown protein            | 1 | 1 | 1 |
| A169R  | 86904 | 87875 | 74 | 972  | 323 | 36836 | 5.8  | Early-Late | N/A | COG0078 [Ornithine carbamoyltransferase] [5e-07] | PF02729.14 [Aspartate/ornithine carbamoyltransferase carbamoyl-P binding domain] [2.4e-44] / PF00185.17 [Aspartate/ornithine carbamoyltransferase Asp/Om | NP_001148757 [LOC100282373 (Zea mays)] [7e-78]                                                      | Q43087 [RecName: FullAspartate carbamoyltransferase 2 chloroplastic AltName: FullAspartate transcarbamylase 2 ShortATCase 2 Flags: Precursor] [5e-79] | Aspartate transcarbamylase | 0 | 0 | 0 |



|                  |       |           |    |      |      |        |      |            |     |                                                                       |                                                                                                                                                          |                                                                                                      |                                                                  |                      |   |   |   |
|------------------|-------|-----------|----|------|------|--------|------|------------|-----|-----------------------------------------------------------------------|----------------------------------------------------------------------------------------------------------------------------------------------------------|------------------------------------------------------------------------------------------------------|------------------------------------------------------------------|----------------------|---|---|---|
| <b>A185R</b>     | 94548 | 9739<br>0 | 40 | 2843 | 913  | ####   | 8.3  | Early      | N/A | COG0417 [DNA polymerase elongation subunit (family B)] [1e-07]        | PF03104.12 [DNA polymerase family B exonuclease domain] [1.3e-70] / PF00136.14 [DNA polymerase family B] [1.8e-118]                                      | YP_001425655 [hypothetical protein FR483_N023L (Paramecium bursaria Chlorella virus FR483)] [0.0]    | P30320 [RecName: FullDNA polymerase] [0.0]                       | Unknown protein      | 0 | 0 | 0 |
| <b>a186L</b>     | 94966 | 9522<br>0 | 46 | 255  | 84   | 9946   | 5.6  | N/A        | N/A | N/A                                                                   | N/A                                                                                                                                                      | N/A                                                                                                  | N/A                                                              | Hypothetical protein | 0 | 0 | 0 |
| <b>a187L</b>     | 95295 | 9603<br>8 | 58 | 744  | 247  | 28922  | 10.6 | N/A        | N/A | N/A                                                                   | N/A                                                                                                                                                      | N/A                                                                                                  | N/A                                                              | Hypothetical protein | 0 | 0 | 0 |
| <b>a188L</b>     | 96724 | 9695<br>7 | 56 | 234  | 77   | 8398   | 11.1 | N/A        | N/A | N/A                                                                   | N/A                                                                                                                                                      | N/A                                                                                                  | N/A                                                              | Hypothetical protein | 0 | 0 | 0 |
| <b>A188aR</b>    | 96944 | 9739<br>0 | 58 | 447  | 148  | 17326  | 10.0 | N/A        | Yes | COG0417 [DNA polymerase elongation subunit (family B)] [3e-07]        | PF00136.14 [DNA polymerase family B] [6.5e-17]                                                                                                           | YP_001427279 [hypothetical protein ATCV1_Z798L (Acanthocystis turfacea Chlorella virus 1)] [8e-60]   | P30320 [RecName: FullDNA polymerase] [2e-72]                     | Unknown protein      | 0 | 0 | 0 |
| <b>a188bR</b>    | 97258 | 9739<br>8 | 72 | 141  | 46   | 5774   | 11.7 | N/A        | N/A | N/A                                                                   | N/A                                                                                                                                                      | N/A                                                                                                  | N/A                                                              | Hypothetical protein | 1 | 1 | 1 |
| <b>A189/192R</b> | 97433 | 1E+0<br>5 | 28 | 3900 | 1299 | 143575 | 11.4 | Late       | Yes | N/A                                                                   | N/A                                                                                                                                                      | YP_001427275 [hypothetical protein ATCV1_Z794L (Acanthocystis turfacea Chlorella virus 1)] [1e-157]  | N/A                                                              | Unknown protein      | 0 | 0 | 0 |
| <b>a190L</b>     | 97525 | 9774<br>3 | 52 | 219  | 72   | 7634   | 8.8  | N/A        | N/A | N/A                                                                   | N/A                                                                                                                                                      | N/A                                                                                                  | N/A                                                              | Hypothetical protein | 0 | 1 | 0 |
| <b>A193L</b>     | 1E+05 | 1E+0<br>5 | 72 | 789  | 262  | 29627  | 4.7  | Early-Late | N/A | COG0592 [DNA polymerase sliding clamp subunit (PCNA homolog)] [7e-06] | PF00705.11 [Proliferating cell nuclear antigen N-terminal domain] [6.4e-26] / PF02747.8 [Proliferating cell nuclear antigen C-terminal domain] [1.2e-21] | YP_001425651 [hypothetical protein FR483_N019R (Paramecium bursaria Chlorella virus FR483)] [1e-103] | O82134 [RecName: FullProliferating cell nuclear antigen] [7e-36] | Unknown protein      | 0 | 0 | 0 |
| <b>a194R</b>     | 1E+05 | 1E+0<br>5 | 56 | 249  | 82   | 9602   | 10.7 | N/A        | N/A | N/A                                                                   | N/A                                                                                                                                                      | YP_001425650 [hypothetical protein FR483_n018L (Paramecium bursaria Chlorella virus FR483)] [1e-12]  | N/A                                                              | Hypothetical protein | 0 | 0 | 0 |
| <b>a195R</b>     | 1E+05 | 1E+0<br>5 | 66 | 249  | 82   | 9700   | 8.5  | N/A        | N/A | N/A                                                                   | N/A                                                                                                                                                      | N/A                                                                                                  | N/A                                                              | Hypothetical protein | 0 | 0 | 0 |
| <b>A196L</b>     | 1E+05 | 1E+0<br>5 | 90 | 459  | 152  | 17456  | 8.4  | Late       | Yes | N/A                                                                   | N/A                                                                                                                                                      | YP_001425648 [hypothetical protein FR483_N016R (Paramecium bursaria Chlorella virus FR483)] [2e-44]  | N/A                                                              | Unknown protein      | 3 | 3 | 1 |
| <b>a197R</b>     | 1E+05 | 1E+0<br>5 | 62 | 288  | 95   | 11090  | 8.1  | N/A        | N/A | N/A                                                                   | N/A                                                                                                                                                      | N/A                                                                                                  | N/A                                                              | Hypothetical protein | 0 | 0 | 0 |
| <b>a198R</b>     | 1E+05 | 1E+0<br>5 | 62 | 225  | 74   | 8873   | 10.7 | N/A        | N/A | N/A                                                                   | N/A                                                                                                                                                      | N/A                                                                                                  | N/A                                                              | Hypothetical protein | 0 | 0 | 0 |
| <b>A199R</b>     | 1E+05 | 1E+0<br>5 | 6  | 306  | 101  | 10904  | 10.1 | Late       | N/A | N/A                                                                   | N/A                                                                                                                                                      | YP_001427266 [hypothetical protein]                                                                  | N/A                                                              | Unknown protein      | 2 | 3 | 2 |

|               |       |           |    |      |     |       |      |                |     |                                                                                   |                                                                                                                                                                                                         |                                                                                                                     |                                                                         |                                    |   |   |   |  |
|---------------|-------|-----------|----|------|-----|-------|------|----------------|-----|-----------------------------------------------------------------------------------|---------------------------------------------------------------------------------------------------------------------------------------------------------------------------------------------------------|---------------------------------------------------------------------------------------------------------------------|-------------------------------------------------------------------------|------------------------------------|---|---|---|--|
|               |       |           |    |      |     |       |      |                |     |                                                                                   |                                                                                                                                                                                                         | ATCV1_Z785L<br>(Acanthocystis turfacea<br>Chlorella virus 1) [1e-<br>12]                                            |                                                                         |                                    |   |   |   |  |
| <b>A200R</b>  | 1E+05 | 1E+0<br>5 | 76 | 357  | 118 | 13165 | 9.3  | Early          | N/A | N/A                                                                               | PF00383.15<br>[Cytidine and<br>deoxycytidylate<br>deaminase zinc-<br>binding region]<br>[8.4e-13]                                                                                                       | YP_001425646<br>[hypothetical protein<br>FR483_N014L<br>(Paramecium bursaria<br>Chlorella virus FR483)]<br>[4e-39]  | N/A                                                                     | Unknown protein                    | 0 | 0 | 0 |  |
| <b>a200aR</b> | 1E+05 | 1E+0<br>5 | 52 | 165  | 54  | 6424  | 8.4  | N/A            | N/A | N/A                                                                               | N/A                                                                                                                                                                                                     | N/A                                                                                                                 | N/A                                                                     | Hypothetical<br>protein            | 0 | 0 | 0 |  |
| <b>A201L</b>  | 1E+05 | 1E+0<br>5 | 74 | 285  | 94  | 10005 | 10.7 | Early-<br>Late | Yes | N/A                                                                               | N/A                                                                                                                                                                                                     | YP_001425713<br>[hypothetical protein<br>FR483_N081L<br>(Paramecium bursaria<br>Chlorella virus FR483)]<br>[3e-22]  | N/A                                                                     | Unknown protein                    | 2 | 2 | 2 |  |
| <b>A201aL</b> | 1E+05 | 1E+0<br>5 | 18 | 177  | 58  | 6787  | 8.8  | N/A            | Yes | N/A                                                                               | N/A                                                                                                                                                                                                     | N/A                                                                                                                 | N/A                                                                     | Unknown protein                    | 0 | 0 | 0 |  |
| <b>A202L</b>  | 1E+05 | 1E+0<br>5 | 90 | 342  | 113 | 12232 | 5.0  | Early-<br>Late | Yes | N/A                                                                               | N/A                                                                                                                                                                                                     | YP_001425949<br>[hypothetical protein<br>FR483_N317R<br>(Paramecium bursaria<br>Chlorella virus FR483)]<br>[2e-25]  | N/A                                                                     | Unknown protein                    | 0 | 0 | 0 |  |
| <b>A203R</b>  | 1E+05 | 1E+0<br>5 | 26 | 651  | 216 | 24011 | 6.0  | Late           | Yes | N/A                                                                               | N/A                                                                                                                                                                                                     | YP_001425947<br>[hypothetical protein<br>FR483_N315L<br>(Paramecium bursaria<br>Chlorella virus FR483)]<br>[2e-57]  | N/A                                                                     | Unknown protein                    | 1 | 2 | 0 |  |
| <b>a204L</b>  | 1E+05 | 1E+0<br>5 | 62 | 240  | 79  | 8029  | 10.5 | N/A            | N/A | N/A                                                                               | N/A                                                                                                                                                                                                     | YP_001425948<br>[hypothetical protein<br>FR483_n316R<br>(Paramecium bursaria<br>Chlorella virus FR483)]<br>[9e-15]  | N/A                                                                     | Hypothetical<br>protein            | 0 | 0 | 0 |  |
| <b>a204aL</b> | 1E+05 | 1E+0<br>5 | 58 | 162  | 53  | 6061  | 4.2  | N/A            | N/A | N/A                                                                               | N/A                                                                                                                                                                                                     | N/A                                                                                                                 | N/A                                                                     | Hypothetical<br>protein            | 1 | 1 | 1 |  |
| <b>A205R</b>  | 1E+05 | 1E+0<br>5 | 80 | 621  | 206 | 22452 | 12.1 | Late           | Yes | N/A                                                                               | PF08789.3<br>[PBCV-specific<br>basic adaptor<br>domain] [4.2e-16]                                                                                                                                       | YP_001425945<br>[hypothetical protein<br>FR483_N313L<br>(Paramecium bursaria<br>Chlorella virus FR483)]<br>[6e-29]  | N/A                                                                     | Unknown protein                    | 0 | 0 | 0 |  |
| <b>a206L</b>  | 1E+05 | 1E+0<br>5 | 64 | 258  | 85  | 10043 | 11.2 | N/A            | N/A | N/A                                                                               | N/A                                                                                                                                                                                                     | N/A                                                                                                                 | N/A                                                                     | Hypothetical<br>protein            | 0 | 0 | 0 |  |
| <b>A207R</b>  | 1E+05 | 1E+0<br>5 | 86 | 1119 | 372 | 41969 | 4.7  | Early-<br>Late | N/A | COG1166<br>[Arginine<br>decarboxylase<br>(spermidine<br>biosynthesis)]<br>[1e-06] | PF02784.9<br>[Pyridoxal-<br>dependent<br>decarboxylase<br>pyridoxal binding<br>domain] [3.3e-61]<br>/ PF00278.15<br>[Pyridoxal-<br>dependent<br>decarboxylase C-<br>terminal sheet<br>domain] [5.5e-23] | YP_001425944<br>[hypothetical protein<br>FR483_N312L<br>(Paramecium bursaria<br>Chlorella virus FR483)]<br>[1e-139] | P27117 [RecName:<br>FullOrnithine<br>decarboxylase<br>ShortODC] [2e-74] | Arginine/Omithine<br>decarboxylase | 0 | 0 | 0 |  |
| <b>A208R</b>  | 1E+05 | 1E+0<br>5 | 76 | 936  | 311 | 35364 | 4.2  | Early          | N/A | N/A                                                                               | N/A                                                                                                                                                                                                     | N/A                                                                                                                 | N/A                                                                     | Unknown protein                    | 0 | 0 | 0 |  |

|               |       |       |    |      |     |       |      |            |     |                                                                                  |     |                                                                                                      |                                                                                  |                                                                                                  |   |   |    |
|---------------|-------|-------|----|------|-----|-------|------|------------|-----|----------------------------------------------------------------------------------|-----|------------------------------------------------------------------------------------------------------|----------------------------------------------------------------------------------|--------------------------------------------------------------------------------------------------|---|---|----|
| a210L         | 1E+05 | 1E+05 | 64 | 492  | 163 | 16631 | 5.7  | N/A        | N/A | N/A                                                                              | N/A | N/A                                                                                                  | N/A                                                                              | Hypothetical protein                                                                             | 1 | 1 | 1  |
| a211R         | 1E+05 | 1E+05 | 56 | 324  | 107 | 12159 | 12.9 | N/A        | N/A | N/A                                                                              | N/A | N/A                                                                                                  | N/A                                                                              | Hypothetical protein                                                                             | 1 | 2 | 2  |
| A212R         | 1E+05 | 1E+05 | 78 | 168  | 55  | 6345  | 12.3 | N/A        | N/A | N/A                                                                              | N/A | N/A                                                                                                  | N/A                                                                              | Hypothetical protein                                                                             | 0 | 0 | 0  |
| A213L         | 1E+05 | 1E+05 | 84 | 447  | 148 | 16483 | 4.5  | Early-Late | Yes | N/A                                                                              | N/A | YP_001425936 [hypothetical protein FR483_N304R (Paramecium bursaria Chlorella virus FR483)] [1e-30]  | N/A                                                                              | Unknown protein                                                                                  | 1 | 1 | 1  |
| a213aL        | 1E+05 | 1E+05 | 56 | 147  | 48  | 5567  | 12.0 | N/A        | N/A | N/A                                                                              | N/A | N/A                                                                                                  | N/A                                                                              | Hypothetical protein                                                                             | 0 | 0 | 0  |
| A214L         | 1E+05 | 1E+05 | 76 | 408  | 135 | 15424 | 7.1  | Early      | N/A | N/A                                                                              | N/A | YP_001425935 [hypothetical protein FR483_N303R (Paramecium bursaria Chlorella virus FR483)] [9e-21]  | N/A                                                                              | Unknown protein                                                                                  | 0 | 0 | 0  |
| a214aL        | 1E+05 | 1E+05 | 46 | 144  | 47  | 5815  | 10.6 | N/A        | N/A | N/A                                                                              | N/A | N/A                                                                                                  | N/A                                                                              | Hypothetical protein                                                                             | 1 | 0 | 1  |
| A215L         | 1E+05 | 1E+05 | 82 | 966  | 321 | 35707 | 10.1 | Late       | N/A | N/A                                                                              | N/A | YP_001425925 [hypothetical protein FR483_N293R (Paramecium bursaria Chlorella virus FR483)] [1e-115] | N/A                                                                              | Alkaline alginate lyase / 1-4 polyglucuronic acid lyase / polysaccharide lyase family 14 / vAL-1 | 0 | 0 | 0  |
| a216R         | 1E+05 | 1E+05 | 62 | 324  | 107 | 11708 | 6.7  | N/A        | N/A | N/A                                                                              | N/A | N/A                                                                                                  | N/A                                                                              | Hypothetical protein                                                                             | 1 | 2 | 2  |
| A217L         | 1E+05 | 1E+05 | 70 | 1185 | 394 | 45248 | 9.9  | Early-Late | Yes | N/A                                                                              | N/A | YP_001425921 [hypothetical protein FR483_N289R (Paramecium bursaria Chlorella virus FR483)] [1e-164] | N/A                                                                              | Unknown protein                                                                                  | 0 | 0 | 1  |
| a218L         | 1E+05 | 1E+05 | 18 | 366  | 121 | 14878 | 10.6 | N/A        | N/A | N/A                                                                              | N/A | N/A                                                                                                  | N/A                                                                              | Hypothetical protein                                                                             | 0 | 0 | 0  |
| A219/222/226R | 1E+05 | 1E+05 | 58 | 2034 | 677 | 77797 | 7.0  | Early      | Yes | COG1215 [Glycosyltransferases probably involved in cell wall biogenesis] [4e-06] | N/A | YP_001426347 [hypothetical protein FR483_N715L (Paramecium bursaria Chlorella virus FR483)] [0.0]    | P58932 [RecName: FullCellulose synthase catalytic subunit (UDP-forming)] [6e-07] | Unknown protein                                                                                  | 9 | 8 | 10 |
| a220L         | 1E+05 | 1E+05 | 50 | 390  | 129 | 15951 | 8.7  | N/A        | N/A | N/A                                                                              | N/A | N/A                                                                                                  | N/A                                                                              | Hypothetical protein                                                                             | 1 | 0 | 1  |
| a223R         | 1E+05 | 1E+05 | 60 | 213  | 70  | 7560  | 11.3 | N/A        | N/A | N/A                                                                              | N/A | N/A                                                                                                  | N/A                                                                              | Hypothetical protein                                                                             | 0 | 1 | 0  |
| a223aL        | 1E+05 | 1E+05 | 64 | 279  | 92  | 10021 | 8.5  | N/A        | N/A | N/A                                                                              | N/A | YP_001426907 [hypothetical protein ATCV1_2426L (Acanthocystis turfacea Chlorella virus 1)] [4e-12]   | N/A                                                                              | Hypothetical protein                                                                             | 0 | 0 | 0  |
| a224L         | 1E+05 | 1E+05 | 54 | 267  | 88  | 9977  | 10.3 | N/A        | N/A | N/A                                                                              | N/A | N/A                                                                                                  | N/A                                                                              | Hypothetical protein                                                                             | 0 | 0 | 0  |
| a225L         | 1E+05 | 1E+05 | 66 | 273  | 90  | 11049 | 6.9  | N/A        | N/A | N/A                                                                              | N/A | N/A                                                                                                  | N/A                                                                              | Hypothetical protein                                                                             | 0 | 0 | 0  |

|        |       |       |    |      |     |       |      |            |     |                                                 |                                                             |                                                                                                                     |                                                                         |                            |   |   |   |
|--------|-------|-------|----|------|-----|-------|------|------------|-----|-------------------------------------------------|-------------------------------------------------------------|---------------------------------------------------------------------------------------------------------------------|-------------------------------------------------------------------------|----------------------------|---|---|---|
| A227L  | 1E+05 | 1E+05 | 80 | 414  | 137 | 15689 | 10.0 | Late       | Yes | N/A                                             | N/A                                                         | YP_001425876<br>[hypothetical protein<br>FR483_N244R<br>(Paramecium bursaria<br>Chlorella virus FR483)]<br>[6e-41]  | N/A                                                                     | Unknown protein            | 0 | 0 | 0 |
| a228R  | 1E+05 | 1E+05 | 60 | 231  | 76  | 8736  | 9.7  | N/A        | N/A | N/A                                             | N/A                                                         | YP_001425877<br>[hypothetical protein<br>FR483_n245L<br>(Paramecium bursaria<br>Chlorella virus FR483)]<br>[4e-11]  | N/A                                                                     | Hypothetical protein       | 0 | 1 | 0 |
| a228aR | 1E+05 | 1E+05 | 64 | 135  | 44  | 5254  | 10.1 | N/A        | N/A | N/A                                             | N/A                                                         | N/A                                                                                                                 | N/A                                                                     | Hypothetical protein       | 1 | 1 | 1 |
| A229L  | 1E+05 | 1E+05 | 82 | 234  | 77  | 8329  | 8.5  | Early-Late | N/A | N/A                                             | N/A                                                         | N/A                                                                                                                 | N/A                                                                     | Unknown protein            | 2 | 2 | 2 |
| A230R  | 1E+05 | 1E+05 | 36 | 591  | 196 | 22055 | 8.4  | Late       | Yes | N/A                                             | N/A                                                         | YP_001425874<br>[hypothetical protein<br>FR483_N242L<br>(Paramecium bursaria<br>Chlorella virus FR483)]<br>[8e-34]  | N/A                                                                     | Unknown protein            | 4 | 4 | 4 |
| A231L  | 1E+05 | 1E+05 | 80 | 1152 | 383 | 43644 | 9.9  | Early-Late | Yes | N/A                                             | N/A                                                         | YP_001426097<br>[hypothetical protein<br>FR483_N465R<br>(Paramecium bursaria<br>Chlorella virus FR483)]<br>[1e-137] | N/A                                                                     | Unknown protein            | 1 | 0 | 0 |
| a232R  | 1E+05 | 1E+05 | 60 | 264  | 87  | 10420 | 9.0  | N/A        | N/A | N/A                                             | N/A                                                         | N/A                                                                                                                 | N/A                                                                     | Hypothetical protein       | 0 | 1 | 0 |
| a232aR | 1E+05 | 1E+05 | 52 | 135  | 44  | 5103  | 10.6 | N/A        | N/A | N/A                                             | N/A                                                         | N/A                                                                                                                 | N/A                                                                     | Hypothetical protein       | 1 | 1 | 1 |
| A233R  | 1E+05 | 1E+05 | 42 | 339  | 112 | 13599 | 9.3  | Late       | N/A | N/A                                             | N/A                                                         | YP_001425872<br>[hypothetical protein<br>FR483_N240L<br>(Paramecium bursaria<br>Chlorella virus FR483)]<br>[1e-14]  | N/A                                                                     | Unknown protein            | 0 | 0 | 0 |
| A234L  | 1E+05 | 1E+05 | 72 | 327  | 108 | 12388 | 10.4 | Early-Late | N/A | N/A                                             | N/A                                                         | YP_001425871<br>[hypothetical protein<br>FR483_N239R<br>(Paramecium bursaria<br>Chlorella virus FR483)]<br>[6e-21]  | N/A                                                                     | Unknown protein            | 0 | 0 | 0 |
| a235R  | 1E+05 | 1E+05 | 54 | 252  | 83  | 9647  | 7.1  | N/A        | N/A | N/A                                             | N/A                                                         | N/A                                                                                                                 | N/A                                                                     | Hypothetical protein       | 0 | 0 | 0 |
| a236L  | 1E+05 | 1E+05 | 68 | 264  | 87  | 10307 | 8.7  | N/A        | N/A | N/A                                             | N/A                                                         | N/A                                                                                                                 | N/A                                                                     | Hypothetical protein       | 2 | 1 | 2 |
| A237R  | 1E+05 | 1E+05 | 22 | 1557 | 518 | 58565 | 9.5  | Late       | Yes | COG5310<br>[Homospermidine<br>synthase] [4e-23] | PF03435.11<br>[Saccharopine<br>dehydrogenase ]<br>[1.2e-96] | YP_001425864<br>[hypothetical protein<br>FR483_N232L<br>(Paramecium bursaria<br>Chlorella virus FR483)]<br>[0.0]    | Q98H64 [RecName:<br>FullHomospermidine<br>synthase ShortHSS]<br>[2e-54] | Homospermidine<br>synthase | 0 | 0 | 0 |
| a238L  | 1E+05 | 1E+05 | 46 | 345  | 114 | 12804 | 9.4  | N/A        | N/A | N/A                                             | N/A                                                         | YP_001425865<br>[hypothetical protein<br>FR483_n233R<br>(Paramecium bursaria<br>Chlorella virus FR483)]<br>[3e-17]  | N/A                                                                     | Hypothetical protein       | 0 | 0 | 0 |
| A239L  | 1E+05 | 1E+05 | 72 | 447  | 148 | 17052 | 5.0  | Early      | N/A | N/A                                             | N/A                                                         | N/A                                                                                                                 | N/A                                                                     | Unknown protein            | 0 | 0 | 0 |

|        |       |       |    |      |     |       |      |            |     |                                                   |                                                                                             |                                                                                                      |                                                                                                                               |                                     |   |   |   |
|--------|-------|-------|----|------|-----|-------|------|------------|-----|---------------------------------------------------|---------------------------------------------------------------------------------------------|------------------------------------------------------------------------------------------------------|-------------------------------------------------------------------------------------------------------------------------------|-------------------------------------|---|---|---|
| a240L  | 1E+05 | 1E+05 | 48 | 198  | 65  | 7734  | 12.8 | N/A        | N/A | N/A                                               | N/A                                                                                         | N/A                                                                                                  | N/A                                                                                                                           | Hypothetical protein                | 0 | 0 | 0 |
| A240aL | 1E+05 | 1E+05 | 72 | 186  | 61  | 7125  | 10.2 | N/A        | N/A | N/A                                               | N/A                                                                                         | N/A                                                                                                  | N/A                                                                                                                           | Hypothetical protein                | 1 | 1 | 0 |
| a240bR | 1E+05 | 1E+05 | 68 | 141  | 46  | 5363  | 9.8  | N/A        | N/A | N/A                                               | N/A                                                                                         | N/A                                                                                                  | N/A                                                                                                                           | Hypothetical protein                | 0 | 1 | 1 |
| a240cL | 1E+05 | 1E+05 | 52 | 165  | 54  | 6440  | 9.4  | N/A        | N/A | N/A                                               | N/A                                                                                         | N/A                                                                                                  | N/A                                                                                                                           | Hypothetical protein                | 0 | 0 | 0 |
| a240dL | 1E+05 | 1E+05 | 60 | 147  | 48  | 5633  | 6.5  | N/A        | N/A | N/A                                               | N/A                                                                                         | N/A                                                                                                  | N/A                                                                                                                           | Hypothetical protein                | 0 | 0 | 0 |
| A241R  | 1E+05 | 1E+05 | 78 | 2178 | 725 | 82753 | 6.6  | Early      | N/A | COG1201 [Lhr-like helicases] [5e-06]              | PF00270.22 [DEAD/DEAH box helicase] [7.3e-19] / PF08148.5 [DSHCT (NUC185) domain] [1.4e-15] | YP_001425859 [hypothetical protein FR483_N227L (Paramecium bursaria Chlorella virus FR483)] [0.0]    | Q15477 [RecName: FullHelicase SK12W AltName: FullHelicase-like protein ShortHLP] [7e-87]                                      | Unknown protein                     | 0 | 0 | 0 |
| a242L  | 1E+05 | 1E+05 | 62 | 354  | 117 | 13745 | 6.1  | N/A        | N/A | N/A                                               | N/A                                                                                         | N/A                                                                                                  | N/A                                                                                                                           | Hypothetical protein                | 0 | 3 | 0 |
| A243R  | 1E+05 | 1E+05 | 92 | 909  | 302 | 36101 | 10.3 | Early-Late | N/A | N/A                                               | N/A                                                                                         | YP_001425731 [hypothetical protein FR483_N099R (Paramecium bursaria Chlorella virus FR483)] [1e-134] | N/A                                                                                                                           | Unknown protein                     | 0 | 0 | 0 |
| a244L  | 1E+05 | 1E+05 | 44 | 234  | 77  | 8398  | 9.3  | N/A        | N/A | N/A                                               | N/A                                                                                         | N/A                                                                                                  | N/A                                                                                                                           | Hypothetical protein                | 0 | 1 | 0 |
| A245R  | 1E+05 | 1E+05 | 80 | 564  | 187 | 19748 | 9.3  | Late       | Yes | COG2032 [Cu/Zn superoxide dismutase] [9e-07]      | PF00080.13 [Copper/zinc superoxide dismutase (SODC)] [3.1e-49]                              | YP_001426671 [hypothetical protein ATCV1_Z190L (Acanthocystis turfacea Chlorella virus 1)] [1e-68]   | Q751L8 [RecName: FullSuperoxide dismutase (Cu-Zn)] [8e-41]                                                                    | Cu/Zn superoxide dismutase          | 1 | 1 | 0 |
| A246R  | 1E+05 | 1E+05 | 82 | 342  | 113 | 12017 | 11.5 | Late       | Yes | N/A                                               | N/A                                                                                         | N/A                                                                                                  | N/A                                                                                                                           | Unknown protein                     | 0 | 0 | 0 |
| A246aR | 1E+05 | 1E+05 | 56 | 459  | 152 | 16618 | 8.0  | N/A        | N/A | N/A                                               | PF00967.10 [Barwin family] [3e-47]                                                          | NP_187123 [PR4 (PATHOGENESIS-RELATED 4) chitin binding (Arabidopsis thaliana)] [8e-10]               | P43082 [RecName: FullHevein-like protein Flags: Precursor] [6e-11]                                                            | Hypothetical protein                | 0 | 0 | 0 |
| A247R  | 1E+05 | 1E+05 | 84 | 1152 | 383 | 44592 | 6.1  | Early-Late | N/A | COG0666 [FOG: Ankyrin repeat] [1e-09]             | PF00023.23 [Ankyrin repeat] [8.6e-06]                                                       | YP_001958455 [hypothetical protein Aasi_1435 (Candidatus Amoebophilus asiaticus 5a2)] [9e-26]        | Q4UMH6 [RecName: FullPutative ankyrin repeat protein RF_0381] [2e-20]                                                         | Unknown protein                     | 0 | 0 | 0 |
| A248R  | 1E+05 | 1E+05 | 70 | 927  | 308 | 35564 | 8.0  | Early      | N/A | COG0515 [Serine/threonine protein kinase] [1e-05] | PF00069.18 [Protein kinase domain] [2.4e-52]                                                | YP_001426416 [hypothetical protein FR483_N784R (Paramecium bursaria Chlorella virus FR483)] [3e-61]  | Q1ZXH2 [RecName: FullProbable serine/threonine-protein kinase fhkB AltName: FullForkhead-associated kinase protein B] [4e-24] | Protein kinase                      | 0 | 0 | 0 |
| a249L  | 1E+05 | 1E+05 | 70 | 309  | 102 | 11134 | 10.5 | N/A        | N/A | N/A                                               | N/A                                                                                         | N/A                                                                                                  | N/A                                                                                                                           | Hypothetical protein                | 1 | 1 | 1 |
| A250R  | 1E+05 | 1E+05 | 82 | 285  | 94  | 10620 | 8.8  | Early-Late | N/A | N/A                                               | PF07885.9 [ion channel] [3.2e-11]                                                           | YP_001427066 [hypothetical protein ATCV1_Z585R (Acanthocystis turfacea Chlorella virus 1)] [4e-      | N/A                                                                                                                           | Potassium ion channel protein (Kcv) | 2 | 2 | 2 |





|           |       |       |    |     |     |       |      |            |     |                                     |                                                             |                                                                                                     |                                                                                                  |                      |   |   |   |
|-----------|-------|-------|----|-----|-----|-------|------|------------|-----|-------------------------------------|-------------------------------------------------------------|-----------------------------------------------------------------------------------------------------|--------------------------------------------------------------------------------------------------|----------------------|---|---|---|
| A261R     | 1E+05 | 1E+05 | 88 | 618 | 205 | 25196 | 8.7  | Early-Late | N/A | N/A                                 | N/A                                                         | N/A                                                                                                 | N/A                                                                                              | Unknown protein      | 0 | 0 | 0 |
| A262/263L | 1E+05 | 1E+05 | 64 | 771 | 256 | 29470 | 9.6  | N/A        | Yes | N/A                                 | N/A                                                         | YP_001425738 [hypothetical protein FR483_N106L (Paramecium bursaria Chlorella virus FR483)] [4e-46] | N/A                                                                                              | Unknown protein      | 2 | 3 | 2 |
| a264R     | 1E+05 | 1E+05 | 84 | 204 | 67  | 7641  | 9.4  | N/A        | N/A | N/A                                 | N/A                                                         | N/A                                                                                                 | N/A                                                                                              | Hypothetical protein | 2 | 2 | 1 |
| A265L     | 1E+05 | 1E+05 | 90 | 750 | 249 | 27947 | 9.3  | Early-Late | N/A | N/A                                 | PF04848.6 [Poxvirus A22 protein] [8.6e-11]                  | YP_001426640 [hypothetical protein ATCV1_Z159R (Acanthocystis turfatea Chlorella virus 1)] [5e-73]  | N/A                                                                                              | Unknown protein      | 0 | 0 | 0 |
| a266R     | 1E+05 | 1E+05 | 68 | 252 | 83  | 9838  | 9.4  | N/A        | N/A | N/A                                 | N/A                                                         | N/A                                                                                                 | N/A                                                                                              | Hypothetical protein | 0 | 1 | 0 |
| a266aR    | 1E+05 | 1E+05 | 58 | 126 | 41  | 4771  | 9.0  | N/A        | N/A | N/A                                 | N/A                                                         | N/A                                                                                                 | N/A                                                                                              | Hypothetical protein | 0 | 0 | 0 |
| A267L     | 1E+05 | 1E+05 | 80 | 945 | 314 | 36686 | 8.2  | Early      | N/A | N/A                                 | N/A                                                         | YP_142777 [hypothetical protein MIM1_R423 (Acanthamoeba polyphaga mimivirus)] [2e-15]               | Q5UQL9 [Uncharacterized protein R423] [2e-16]                                                    | Unknown protein      | 0 | 0 | 0 |
| a268R     | 1E+05 | 1E+05 | 50 | 216 | 71  | 8208  | 9.7  | N/A        | N/A | N/A                                 | N/A                                                         | N/A                                                                                                 | N/A                                                                                              | Hypothetical protein | 0 | 1 | 0 |
| a269R     | 1E+05 | 1E+05 | 62 | 207 | 68  | 8054  | 8.3  | N/A        | N/A | N/A                                 | N/A                                                         | N/A                                                                                                 | N/A                                                                                              | Hypothetical protein | 1 | 1 | 1 |
| A271L     | 1E+05 | 1E+05 | 74 | 825 | 274 | 31114 | 7.1  | Early-Late | Yes | COG2267 [Lysophospholipase] [1e-07] | PF12146.1 [Putative lysophospholipase] [1.9e-10]            | YP_001426877 [hypothetical protein ATCV1_Z396R (Acanthocystis turfatea Chlorella virus 1)] [5e-51]  | Q55EQ3 [RecName: FullUncharacterized abhydrolase domain-containing protein DDB_G0269086] [6e-08] | Unknown protein      | 0 | 3 | 0 |
| a270R     | 1E+05 | 1E+05 | 80 | 282 | 93  | 10237 | 10.8 | N/A        | N/A | N/A                                 | N/A                                                         | N/A                                                                                                 | N/A                                                                                              | Hypothetical protein | 0 | 2 | 2 |
| a272R     | 1E+05 | 1E+05 | 54 | 204 | 67  | 8074  | 8.8  | N/A        | N/A | N/A                                 | N/A                                                         | N/A                                                                                                 | N/A                                                                                              | Hypothetical protein | 0 | 0 | 0 |
| a272aR    | 1E+05 | 1E+05 | 58 | 240 | 79  | 9104  | 6.9  | N/A        | N/A | N/A                                 | N/A                                                         | N/A                                                                                                 | N/A                                                                                              | Hypothetical protein | 0 | 0 | 0 |
| A273L     | 1E+05 | 1E+05 | 88 | 417 | 138 | 15713 | 9.9  | Late       | Yes | N/A                                 | PF03713.6 [Domain of unknown function (DUF305)] [6.8e-13]   | YP_142507 [hypothetical protein MIM1_L153 (Acanthamoeba polyphaga mimivirus)] [4e-16]               | Q5UPL7 [RecName: FullUncharacterized protein L153] [2e-17]                                       | Unknown protein      | 3 | 3 | 3 |
| A274R     | 1E+05 | 1E+05 | 16 | 792 | 263 | 31386 | 4.4  | Early-Late | N/A | N/A                                 | N/A                                                         | N/A                                                                                                 | N/A                                                                                              | Unknown protein      | 0 | 0 | 0 |
| A275R     | 1E+05 | 1E+05 | 80 | 759 | 252 | 28394 | 9.1  | Early      | N/A | N/A                                 | PF07150.4 [Protein of unknown function (DUF1390)] [8.6e-79] | YP_001425662 [hypothetical protein FR483_N030R (Paramecium bursaria Chlorella virus FR483)] [2e-26] | N/A                                                                                              | Unknown protein      | 0 | 0 | 0 |
| a276L     | 1E+05 | 1E+05 | 60 | 285 | 94  | 11687 | 10.5 | N/A        | N/A | N/A                                 | N/A                                                         | N/A                                                                                                 | N/A                                                                                              | Hypothetical protein | 1 | 2 | 2 |

|        |       |       |    |      |     |       |      |                |     |                                                                         |                                                                                                                           |                                                                                                                     |                                                                                         |                         |   |   |   |
|--------|-------|-------|----|------|-----|-------|------|----------------|-----|-------------------------------------------------------------------------|---------------------------------------------------------------------------------------------------------------------------|---------------------------------------------------------------------------------------------------------------------|-----------------------------------------------------------------------------------------|-------------------------|---|---|---|
| A277L  | 1E+05 | 1E+05 | 70 | 912  | 303 | 34378 | 8.5  | Late           | N/A | COG0515<br>[Serine/threonine<br>protein kinase]<br>[1e-05]              | PF00069.18<br>[Protein kinase<br>domain] [2.2e-42]                                                                        | YP_001426416<br>[hypothetical protein<br>FR483_N784R<br>(Paramecium bursaria<br>Chlorella virus FR483)]<br>[2e-28]  | Q1ZXC8 [RecName:<br>FullProbable<br>serine/threonine-<br>protein kinase pXi]<br>[7e-23] | Protein kinase          | 0 | 0 | 0 |
| A278L  | 1E+05 | 1E+05 | 80 | 1833 | 610 | 69231 | 10.8 | Late           | Yes | N/A                                                                     | PF00069.18<br>[Protein kinase<br>domain] [1.2e-07]<br>/ PF08789.3<br>[PBCV-specific<br>basic adaptor<br>domain] [7.5e-10] | YP_001427189<br>[hypothetical protein<br>ATCV1_Z708L<br>(Acanthocystis turfacea<br>Chlorella virus 1)] [1e-<br>130] | Q99078 [RecName:<br>FullDual specificity<br>protein kinase FUZ7]<br>[5e-07]             | Protein kinase          | 0 | 1 | 0 |
| a279R  | 1E+05 | 1E+05 | 68 | 219  | 72  | 8802  | 10.1 | N/A            | N/A | N/A                                                                     | N/A                                                                                                                       | N/A                                                                                                                 | N/A                                                                                     | Hypothetical<br>protein | 2 | 2 | 1 |
| a280R  | 1E+05 | 1E+05 | 56 | 282  | 93  | 10103 | 3.6  | N/A            | N/A | N/A                                                                     | N/A                                                                                                                       | N/A                                                                                                                 | N/A                                                                                     | Hypothetical<br>protein | 0 | 1 | 0 |
| a281R  | 1E+05 | 1E+05 | 52 | 720  | 239 | 25998 | 4.6  | N/A            | N/A | N/A                                                                     | N/A                                                                                                                       | YP_001426034<br>[hypothetical protein<br>FR483_n402R<br>(Paramecium bursaria<br>Chlorella virus FR483)]<br>[5e-25]  | N/A                                                                                     | Hypothetical<br>protein | 0 | 6 | 0 |
| A282L  | 1E+05 | 1E+05 | 60 | 1710 | 569 | 63371 | 10.8 | Late           | Yes | N/A                                                                     | PF00069.18<br>[Protein kinase<br>domain] [4.8e-10]<br>/ PF08789.3<br>[PBCV-specific<br>basic adaptor<br>domain] [1.3e-17] | YP_001427189<br>[hypothetical protein<br>ATCV1_Z708L<br>(Acanthocystis turfacea<br>Chlorella virus 1)] [1e-<br>129] | N/A                                                                                     | Protein kinase          | 0 | 1 | 0 |
| a283L  | 1E+05 | 1E+05 | 52 | 297  | 98  | 11412 | 12.1 | N/A            | N/A | N/A                                                                     | N/A                                                                                                                       | N/A                                                                                                                 | N/A                                                                                     | Hypothetical<br>protein | 0 | 0 | 0 |
| A284L  | 1E+05 | 1E+05 | 82 | 840  | 279 | 30766 | 9.2  | Early-<br>Late | Yes | COG3049<br>[Penicillin V<br>acylase and<br>related amidases]<br>[1e-06] | PF02275.11<br>[Linear amide C-<br>N hydrolases<br>choloylglycine<br>hydrolase family]<br>[1e-49]                          | YP_001425725<br>[hypothetical protein<br>FR483_N093R<br>(Paramecium bursaria<br>Chlorella virus FR483)]<br>[4e-91]  | P54948 [RecName:<br>FullUncharacterized<br>protein yxel] [1e-29]                        | Amidase                 | 0 | 0 | 0 |
| a285R  | 1E+05 | 1E+05 | 64 | 216  | 71  | 7946  | 12.0 | N/A            | N/A | N/A                                                                     | N/A                                                                                                                       | N/A                                                                                                                 | N/A                                                                                     | Hypothetical<br>protein | 0 | 0 | 0 |
| A286R  | 1E+05 | 1E+05 | 30 | 1137 | 378 | 43042 | 9.6  | Late           | Yes | N/A                                                                     | N/A                                                                                                                       | YP_001425721<br>[hypothetical protein<br>FR483_N089L<br>(Paramecium bursaria<br>Chlorella virus FR483)]<br>[2e-92]  | N/A                                                                                     | Unknown protein         | 0 | 0 | 0 |
| a286aR | 1E+05 | 1E+05 | 76 | 174  | 57  | 6925  | 9.8  | N/A            | N/A | N/A                                                                     | N/A                                                                                                                       | N/A                                                                                                                 | N/A                                                                                     | Hypothetical<br>protein | 0 | 1 | 1 |
| a286bL | 1E+05 | 1E+05 | 52 | 174  | 57  | 6719  | 9.9  | N/A            | N/A | N/A                                                                     | N/A                                                                                                                       | N/A                                                                                                                 | N/A                                                                                     | Hypothetical<br>protein | 0 | 1 | 1 |
| A287R  | 1E+05 | 1E+05 | 74 | 807  | 268 | 31349 | 9.4  | Early-<br>Late | Yes | N/A                                                                     | PF01541.17<br>[GIY-YIG catalytic<br>domain] [4.2e-11]<br>/ PF07453.6<br>[NUMOD1<br>domain] [8.6e-11]                      | YP_001426191<br>[hypothetical protein<br>FR483_N559R<br>(Paramecium bursaria<br>Chlorella virus FR483)]<br>[6e-50]  | N/A                                                                                     | Unknown protein         | 0 | 0 | 0 |
| a288L  | 1E+05 | 1E+05 | 62 | 267  | 88  | 9946  | 9.1  | N/A            | N/A | N/A                                                                     | N/A                                                                                                                       | N/A                                                                                                                 | N/A                                                                                     | Hypothetical<br>protein | 0 | 0 | 0 |
| A289L  | 1E+05 | 1E+05 | 74 | 852  | 283 | 32038 | 7.3  | Early-<br>Late | N/A | COG0515<br>[Serine/threonine<br>protein kinase]<br>[9e-06]              | PF00069.18<br>[Protein kinase<br>domain] [5.5e-50]                                                                        | YP_001426180<br>[hypothetical protein<br>FR483_N548R<br>(Paramecium bursaria                                        | Q54DF2 [RecName:<br>FullProbable<br>serine/threonine-<br>protein kinase MARK-           | Protein kinase          | 0 | 0 | 0 |

|        |       |       |    |     |     |       |      |                |     |                                                             |                                                                                |                                                                                                                     |                                                                                                                                                                                    |                      |   |   |   |
|--------|-------|-------|----|-----|-----|-------|------|----------------|-----|-------------------------------------------------------------|--------------------------------------------------------------------------------|---------------------------------------------------------------------------------------------------------------------|------------------------------------------------------------------------------------------------------------------------------------------------------------------------------------|----------------------|---|---|---|
|        |       |       |    |     |     |       |      |                |     |                                                             |                                                                                | Chlorella virus FR483]]<br>[2e-31]                                                                                  | A] [1e-23]                                                                                                                                                                         |                      |   |   |   |
| a290R  | 1E+05 | 1E+05 | 48 | 408 | 135 | 15384 | 7.9  | N/A            | N/A | N/A                                                         | N/A                                                                            | N/A                                                                                                                 | N/A                                                                                                                                                                                | Hypothetical protein | 0 | 3 | 2 |
| a291R  | 1E+05 | 1E+05 | 68 | 270 | 89  | 10691 | 8.5  | N/A            | N/A | N/A                                                         | N/A                                                                            | N/A                                                                                                                 | N/A                                                                                                                                                                                | Hypothetical protein | 1 | 2 | 1 |
| A292L  | 1E+05 | 2E+05 | 80 | 987 | 328 | 36771 | 9.3  | Late           | N/A | N/A                                                         | PF01374.11<br>[Glycosyl<br>hydrolase family<br>46] [6.1e-97]                   | YP_001426685<br>[hypothetical protein<br>ATCV1_Z204R<br>(Acanthocystis turfacea<br>Chlorella virus 1)] [1e-<br>114] | O07921 [RecName:<br>FullChitosanase<br>Flags: Precursor] [9e-<br>17]                                                                                                               | Chitosanase          | 0 | 0 | 0 |
| a293R  | 1E+05 | 1E+05 | 56 | 507 | 168 | 18889 | 11.7 | N/A            | N/A | N/A                                                         | N/A                                                                            | YP_001426689<br>[hypothetical protein<br>ATCV1_z208L<br>(Acanthocystis turfacea<br>Chlorella virus 1)] [4e-<br>14]  | N/A                                                                                                                                                                                | Hypothetical protein | 1 | 1 | 1 |
| a294R  | 1E+05 | 2E+05 | 54 | 225 | 74  | 7580  | 8.5  | N/A            | N/A | N/A                                                         | N/A                                                                            | N/A                                                                                                                 | N/A                                                                                                                                                                                | Hypothetical protein | 0 | 1 | 0 |
| A295L  | 2E+05 | 2E+05 | 84 | 954 | 317 | 35626 | 7.9  | Early-<br>Late | Yes | COG1088 [dTDP-<br>D-glucose 4e-<br>dehydratase] [8e-<br>06] | PF01370.14<br>[NAD dependent<br>epimerase/dehyd<br>ratase family]<br>[1.6e-68] | YP_001426763<br>[hypothetical protein<br>ATCV1_Z282L<br>(Acanthocystis turfacea<br>Chlorella virus 1)] [1e-<br>119] | Q9LMU0 [RecName:<br>FullPutative GDP-L-<br>fucose synthase 2<br>AltName: FullGDP-4-<br>keto-6-deoxy-D-<br>mannose-3 5-<br>epimerase-4-<br>reductase 2<br>ShortAtGER2] [1e-<br>100] | Fucose synthetase    | 0 | 0 | 0 |
| A296R  | 2E+05 | 2E+05 | 14 | 474 | 157 | 17393 | 12.2 | Late           | Yes | N/A                                                         | N/A                                                                            | YP_001426690<br>[hypothetical protein<br>ATCV1_Z209R<br>(Acanthocystis turfacea<br>Chlorella virus 1)] [3e-<br>16]  | N/A                                                                                                                                                                                | Unknown protein      | 0 | 1 | 1 |
| A297L  | 2E+05 | 2E+05 | 88 | 534 | 177 | 20931 | 9.5  | Late           | N/A | N/A                                                         | N/A                                                                            | YP_001425724<br>[hypothetical protein<br>FR483_N092L<br>(Paramecium bursaria<br>Chlorella virus FR483)]<br>[5e-47]  | N/A                                                                                                                                                                                | Unknown protein      | 0 | 0 | 0 |
| a297aL | 2E+05 | 2E+05 | 40 | 129 | 42  | 5180  | 11.6 | N/A            | N/A | N/A                                                         | N/A                                                                            | N/A                                                                                                                 | N/A                                                                                                                                                                                | Hypothetical protein | 0 | 0 | 0 |
| A298L  | 2E+05 | 2E+05 | 72 | 678 | 225 | 25489 | 5.1  | Early          | N/A | N/A                                                         | N/A                                                                            | YP_001425716<br>[hypothetical protein<br>FR483_N084R<br>(Paramecium bursaria<br>Chlorella virus FR483)]<br>[4e-36]  | N/A                                                                                                                                                                                | Unknown protein      | 0 | 0 | 0 |
| a299R  | 2E+05 | 2E+05 | 48 | 519 | 172 | 18677 | 11.9 | N/A            | N/A | N/A                                                         | N/A                                                                            | N/A                                                                                                                 | N/A                                                                                                                                                                                | Hypothetical protein | 2 | 3 | 2 |
| a300R  | 2E+05 | 2E+05 | 58 | 231 | 76  | 9009  | 9.4  | N/A            | N/A | N/A                                                         | N/A                                                                            | N/A                                                                                                                 | N/A                                                                                                                                                                                | Hypothetical protein | 0 | 0 | 0 |
| A301L  | 2E+05 | 2E+05 | 80 | 726 | 241 | 27394 | 4.5  | Early          | N/A | N/A                                                         | N/A                                                                            | YP_001425714<br>[hypothetical protein<br>FR483_N082R<br>(Paramecium bursaria<br>Chlorella virus FR483)]<br>[8e-11]  | N/A                                                                                                                                                                                | Unknown protein      | 0 | 0 | 0 |
| a302R  | 2E+05 | 2E+05 | 50 | 423 | 140 | 16434 | 7.3  | N/A            | N/A | N/A                                                         | N/A                                                                            | N/A                                                                                                                 | N/A                                                                                                                                                                                | Hypothetical protein | 0 | 0 | 1 |

|        |       |       |    |     |     |       |      |            |     |     |                                                                            |                                                                                                              |                                                                                                                                                                            |                      |   |   |   |
|--------|-------|-------|----|-----|-----|-------|------|------------|-----|-----|----------------------------------------------------------------------------|--------------------------------------------------------------------------------------------------------------|----------------------------------------------------------------------------------------------------------------------------------------------------------------------------|----------------------|---|---|---|
| a303L  | 2E+05 | 2E+05 | 68 | 339 | 112 | 13416 | 11.1 | N/A        | N/A | N/A | N/A                                                                        | N/A                                                                                                          | N/A                                                                                                                                                                        | Hypothetical protein | 2 | 2 | 2 |
| A304R  | 2E+05 | 2E+05 | 8  | 237 | 78  | 9490  | 5.8  | Late       | Yes | N/A | N/A                                                                        | N/A                                                                                                          | N/A                                                                                                                                                                        | Unknown protein      | 0 | 0 | 0 |
| A305L  | 2E+05 | 2E+05 | 66 | 615 | 204 | 22910 | 10.7 | Late       | Yes | N/A | PF00782.13<br>[Dual specificity phosphatase catalytic domain]<br>[3.6e-33] | YP_001425950<br>[hypothetical protein FR483_N318L<br>(Paramecium bursaria Chlorella virus FR483)]<br>[9e-64] | O6BY84 [RecName: FullDual specificity protein phosphatase 16 AllName: FullMitogen-activated protein kinase phosphatase 7 ShortMAP kinase phosphatase 7 ShortMKP-7] [7e-12] | Protein phosphatase  | 0 | 0 | 0 |
| A306L  | 2E+05 | 2E+05 | 82 | 261 | 86  | 10359 | 4.0  | Early-Late | N/A | N/A | N/A                                                                        | YP_001426702<br>[hypothetical protein ATCV1_Z221L<br>(Acanthocystis turfacea Chlorella virus 1)] [9e-23]     | N/A                                                                                                                                                                        | Unknown protein      | 0 | 0 | 0 |
| a307R  | 2E+05 | 2E+05 | 30 | 237 | 78  | 9139  | 9.9  | N/A        | N/A | N/A | N/A                                                                        | N/A                                                                                                          | N/A                                                                                                                                                                        | Hypothetical protein | 0 | 1 | 1 |
| a307aR | 2E+05 | 2E+05 | 68 | 243 | 80  | 9482  | 9.0  | N/A        | N/A | N/A | N/A                                                                        | N/A                                                                                                          | N/A                                                                                                                                                                        | Hypothetical protein | 2 | 2 | 2 |
| A308L  | 2E+05 | 2E+05 | 72 | 360 | 119 | 13562 | 4.0  | Early      | N/A | N/A | N/A                                                                        | YP_001425955<br>[hypothetical protein FR483_N323L<br>(Paramecium bursaria Chlorella virus FR483)]<br>[6e-10] | N/A                                                                                                                                                                        | Unknown protein      | 0 | 0 | 0 |
| a309R  | 2E+05 | 2E+05 | 64 | 129 | 42  | 4922  | 7.5  | N/A        | N/A | N/A | N/A                                                                        | N/A                                                                                                          | N/A                                                                                                                                                                        | Hypothetical protein | 0 | 1 | 1 |
| A310L  | 2E+05 | 2E+05 | 88 | 513 | 170 | 18268 | 8.5  | Late       | Yes | N/A | N/A                                                                        | YP_001426703<br>[hypothetical protein ATCV1_Z222L<br>(Acanthocystis turfacea Chlorella virus 1)] [3e-52]     | N/A                                                                                                                                                                        | Unknown protein      | 0 | 0 | 0 |
| a311R  | 2E+05 | 2E+05 | 54 | 252 | 83  | 8714  | 6.5  | N/A        | N/A | N/A | N/A                                                                        | N/A                                                                                                          | N/A                                                                                                                                                                        | Hypothetical protein | 1 | 1 | 1 |
| A312L  | 2E+05 | 2E+05 | 66 | 717 | 238 | 26612 | 5.0  | Early-Late | N/A | N/A | N/A                                                                        | YP_001425959<br>[hypothetical protein FR483_N327L<br>(Paramecium bursaria Chlorella virus FR483)]<br>[4e-94] | N/A                                                                                                                                                                        | Unknown protein      | 0 | 0 | 0 |
| a312aR | 2E+05 | 2E+05 | 42 | 159 | 52  | 6074  | 4.6  | N/A        | N/A | N/A | N/A                                                                        | N/A                                                                                                          | N/A                                                                                                                                                                        | Hypothetical protein | 2 | 2 | 2 |
| A313L  | 2E+05 | 2E+05 | 78 | 216 | 71  | 7838  | 9.8  | Late       | N/A | N/A | N/A                                                                        | YP_001425961<br>[hypothetical protein FR483_N329L<br>(Paramecium bursaria Chlorella virus FR483)]<br>[9e-06] | N/A                                                                                                                                                                        | Unknown protein      | 1 | 1 | 1 |
| a313aR | 2E+05 | 2E+05 | 64 | 162 | 53  | 6275  | 9.9  | N/A        | N/A | N/A | N/A                                                                        | N/A                                                                                                          | N/A                                                                                                                                                                        | Hypothetical protein | 0 | 1 | 0 |
| A314R  | 2E+05 | 2E+05 | 68 | 243 | 80  | 9114  | 6.7  | Late       | Yes | N/A | N/A                                                                        | YP_001425962<br>[hypothetical protein FR483_N330R<br>(Paramecium bursaria Chlorella virus FR483)]            | N/A                                                                                                                                                                        | Unknown protein      | 1 | 1 | 1 |



|        |       |       |    |      |     |       |      |                |     |                                             |                                                                                                                            |                                                                                                                    |                                                                                    |                         |   |   |   |
|--------|-------|-------|----|------|-----|-------|------|----------------|-----|---------------------------------------------|----------------------------------------------------------------------------------------------------------------------------|--------------------------------------------------------------------------------------------------------------------|------------------------------------------------------------------------------------|-------------------------|---|---|---|
| A328L  | 2E+05 | 2E+05 | 88 | 1068 | 355 | 42024 | 9.2  | N/A            | N/A | N/A                                         | N/A                                                                                                                        | YP_001425978<br>[hypothetical protein<br>FR483_N346L<br>(Paramecium bursaria<br>Chlorella virus FR483)]<br>[3e-69] | N/A                                                                                | Hypothetical<br>protein | 0 | 0 | 0 |
| A329R  | 2E+05 | 2E+05 | 64 | 291  | 96  | 10756 | 4.8  | Late           | N/A | N/A                                         | N/A                                                                                                                        | YP_001426735<br>[hypothetical protein<br>ATCV1_Z254R<br>(Acanthocystis turfacea<br>Chlorella virus 1)] [3e-<br>13] | N/A                                                                                | Unknown protein         | 0 | 0 | 0 |
| a329aL | 2E+05 | 2E+05 | 36 | 135  | 44  | 4997  | 8.2  | N/A            | N/A | N/A                                         | N/A                                                                                                                        | N/A                                                                                                                | N/A                                                                                | Hypothetical<br>protein | 0 | 0 | 0 |
| A329bR | 2E+05 | 2E+05 | 80 | 186  | 61  | 6905  | 10.4 | N/A            | N/A | N/A                                         | N/A                                                                                                                        | N/A                                                                                                                | N/A                                                                                | Hypothetical<br>protein | 2 | 1 | 1 |
| a329cR | 2E+05 | 2E+05 | 74 | 186  | 61  | 6892  | 9.2  | N/A            | N/A | N/A                                         | N/A                                                                                                                        | N/A                                                                                                                | N/A                                                                                | Hypothetical<br>protein | 2 | 2 | 1 |
| A330R  | 2E+05 | 2E+05 | 84 | 1299 | 432 | 49958 | 7.5  | Early-<br>Late | N/A | COG0666 [FOG:<br>Ankyrin repeat]<br>[9e-06] | PF00023.23<br>[Ankyrin repeat]<br>[1.3e-07]                                                                                | XP_001321901 [ankyrin<br>repeat protein<br>(Trichomonas vaginalis<br>G3)] [7e-31]                                  | Q12955 [RecName:<br>FullAnkyrin-3<br>ShortANK-3 AllName:<br>FullAnkyrin-G] [1e-26] | Unknown protein         | 0 | 0 | 0 |
| a331L  | 2E+05 | 2E+05 | 62 | 204  | 67  | 7616  | 9.8  | N/A            | N/A | N/A                                         | N/A                                                                                                                        | N/A                                                                                                                | N/A                                                                                | Hypothetical<br>protein | 1 | 2 | 1 |
| A333L  | 2E+05 | 2E+05 | 92 | 1173 | 390 | 43025 | 8.1  | Early-<br>Late | N/A | N/A                                         | PF03067.8<br>[Chitin binding<br>domain] [2.1e-24]<br>/ PF01607.17<br>[Chitin binding<br>Peritrophin-A<br>domain] [1.7e-07] | YP_001426322<br>[hypothetical protein<br>FR483_N690R<br>(Paramecium bursaria<br>Chlorella virus FR483)]<br>[2e-85] | N/A                                                                                | Unknown protein         | 1 | 2 | 1 |
| a334L  | 2E+05 | 2E+05 | 54 | 270  | 89  | 10302 | 12.5 | N/A            | N/A | N/A                                         | N/A                                                                                                                        | N/A                                                                                                                | N/A                                                                                | Hypothetical<br>protein | 0 | 0 | 0 |
| a335R  | 2E+05 | 2E+05 | 58 | 225  | 74  | 7939  | 10.6 | N/A            | N/A | N/A                                         | N/A                                                                                                                        | N/A                                                                                                                | N/A                                                                                | Hypothetical<br>protein | 0 | 0 | 0 |
| a336R  | 2E+05 | 2E+05 | 60 | 258  | 85  | 9750  | 8.6  | N/A            | N/A | N/A                                         | N/A                                                                                                                        | N/A                                                                                                                | N/A                                                                                | Hypothetical<br>protein | 0 | 0 | 0 |
| A337L  | 2E+05 | 2E+05 | 76 | 609  | 202 | 23000 | 8.8  | Early-<br>Late | N/A | N/A                                         | N/A                                                                                                                        | YP_001426717<br>[hypothetical protein<br>ATCV1_Z236L<br>(Acanthocystis turfacea<br>Chlorella virus 1)] [5e-<br>16] | N/A                                                                                | Unknown protein         | 0 | 0 | 0 |
| a340R  | 2E+05 | 2E+05 | 62 | 279  | 92  | 11149 | 8.2  | N/A            | N/A | N/A                                         | N/A                                                                                                                        | N/A                                                                                                                | N/A                                                                                | Hypothetical<br>protein | 1 | 1 | 1 |
| A339L  | 2E+05 | 2E+05 | 76 | 186  | 61  | 7372  | 11.1 | Early-<br>Late | Yes | N/A                                         | N/A                                                                                                                        | N/A                                                                                                                | N/A                                                                                | Unknown protein         | 0 | 0 | 0 |
| A341L  | 2E+05 | 2E+05 | 76 | 408  | 135 | 15341 | 4.0  | Early          | N/A | N/A                                         | N/A                                                                                                                        | N/A                                                                                                                | N/A                                                                                | Unknown protein         | 0 | 0 | 0 |
| a341aR | 2E+05 | 2E+05 | 52 | 198  | 65  | 7269  | 4.4  | N/A            | N/A | N/A                                         | N/A                                                                                                                        | N/A                                                                                                                | N/A                                                                                | Hypothetical<br>protein | 0 | 1 | 0 |
| a341bR | 2E+05 | 2E+05 | 8  | 159  | 52  | 5765  | 8.1  | N/A            | N/A | N/A                                         | N/A                                                                                                                        | N/A                                                                                                                | N/A                                                                                | Hypothetical<br>protein | 0 | 1 | 0 |
| A342L  | 2E+05 | 2E+05 | 74 | 1731 | 576 | 63813 | 9.2  | Early-<br>Late | Yes | N/A                                         | N/A                                                                                                                        | YP_001425991<br>[hypothetical protein<br>FR483_N359L<br>(Paramecium bursaria<br>Chlorella virus FR483)]<br>[0.0]   | N/A                                                                                | Unknown protein         | 1 | 1 | 1 |

|        |       |       |    |      |     |       |      |            |     |     |                                                             |                                                                                                     |                                                                             |                      |   |   |   |
|--------|-------|-------|----|------|-----|-------|------|------------|-----|-----|-------------------------------------------------------------|-----------------------------------------------------------------------------------------------------|-----------------------------------------------------------------------------|----------------------|---|---|---|
| a343R  | 2E+05 | 2E+05 | 56 | 261  | 86  | 10111 | 8.7  | N/A        | N/A | N/A | N/A                                                         | N/A                                                                                                 | N/A                                                                         | Hypothetical protein | 0 | 0 | 0 |
| a344R  | 2E+05 | 2E+05 | 44 | 348  | 115 | 13071 | 10.4 | N/A        | N/A | N/A | N/A                                                         | N/A                                                                                                 | N/A                                                                         | Hypothetical protein | 0 | 0 | 0 |
| a345L  | 2E+05 | 2E+05 | 54 | 291  | 96  | 11083 | 10.3 | N/A        | N/A | N/A | N/A                                                         | N/A                                                                                                 | N/A                                                                         | Hypothetical protein | 0 | 0 | 0 |
| a346L  | 2E+05 | 2E+05 | 48 | 228  | 75  | 8680  | 9.3  | N/A        | N/A | N/A | N/A                                                         | N/A                                                                                                 | N/A                                                                         | Hypothetical protein | 1 | 2 | 2 |
| a347L  | 2E+05 | 2E+05 | 40 | 213  | 70  | 8435  | 7.7  | N/A        | N/A | N/A | N/A                                                         | N/A                                                                                                 | N/A                                                                         | Hypothetical protein | 0 | 0 | 0 |
| A348R  | 2E+05 | 2E+05 | 66 | 480  | 159 | 18321 | 8.9  | Early      | N/A | N/A | N/A                                                         | N/A                                                                                                 | N/A                                                                         | Unknown protein      | 0 | 0 | 0 |
| a348aR | 2E+05 | 2E+05 | 52 | 156  | 51  | 5768  | 9.0  | N/A        | N/A | N/A | N/A                                                         | N/A                                                                                                 | N/A                                                                         | Hypothetical protein | 0 | 1 | 1 |
| A349L  | 2E+05 | 2E+05 | 66 | 549  | 182 | 21077 | 10.0 | Early-Late | Yes | N/A | N/A                                                         | YP_001426595 [hypothetical protein ATCV1_Z114L (Acanthocystis turfacea Chlorella virus 1)] [2e-31]  | N/A                                                                         | Unknown protein      | 0 | 1 | 0 |
| A350R  | 2E+05 | 2E+05 | 64 | 369  | 122 | 14676 | 9.7  | N/A        | Yes | N/A | PF12239.1 [Protein of unknown function (DUF3605)] [4.4e-23] | YP_001426000 [hypothetical protein FR483_n368R (Paramecium bursaria Chlorella virus FR483)] [6e-30] | N/A                                                                         | Unknown protein      | 0 | 0 | 0 |
| a350aR | 2E+05 | 2E+05 | 52 | 135  | 44  | 5299  | 11.3 | N/A        | N/A | N/A | N/A                                                         | N/A                                                                                                 | N/A                                                                         | Hypothetical protein | 0 | 0 | 0 |
| A351L  | 2E+05 | 2E+05 | 80 | 1077 | 358 | 41335 | 9.6  | Early      | N/A | N/A | PF01541.17 [GTY-YIG catalytic domain] [3.6e-08]             | YP_001426752 [hypothetical protein ATCV1_Z271R (Acanthocystis turfacea Chlorella virus 1)] [3e-84]  | N/A                                                                         | Unknown protein      | 0 | 1 | 0 |
| a351aL | 2E+05 | 2E+05 | 36 | 132  | 43  | 5148  | 8.5  | N/A        | N/A | N/A | N/A                                                         | N/A                                                                                                 | N/A                                                                         | Hypothetical protein | 0 | 0 | 0 |
| A352L  | 2E+05 | 2E+05 | 90 | 624  | 207 | 23310 | 3.6  | Late       | Yes | N/A | N/A                                                         | YP_001426751 [hypothetical protein ATCV1_Z270R (Acanthocystis turfacea Chlorella virus 1)] [2e-65]  | Q5UQF7 [RecName: FullUncharacterized protein R489 Flags: Precursor] [1e-05] | Unknown protein      | 0 | 1 | 1 |
| a353R  | 2E+05 | 2E+05 | 48 | 207  | 68  | 9017  | 12.6 | N/A        | N/A | N/A | N/A                                                         | N/A                                                                                                 | N/A                                                                         | Hypothetical protein | 0 | 0 | 0 |
| A354R  | 2E+05 | 2E+05 | 88 | 1038 | 345 | 40103 | 9.6  | Early-Late | N/A | N/A | N/A                                                         | YP_001427263 [hypothetical protein ATCV1_Z782L (Acanthocystis turfacea Chlorella virus 1)] [4e-72]  | N/A                                                                         | Unknown protein      | 0 | 0 | 0 |
| a355L  | 2E+05 | 2E+05 | 64 | 219  | 72  | 8354  | 7.0  | N/A        | N/A | N/A | N/A                                                         | N/A                                                                                                 | N/A                                                                         | Hypothetical protein | 0 | 0 | 0 |
| A356R  | 2E+05 | 2E+05 | 68 | 324  | 107 | 12512 | 10.5 | N/A        | Yes | N/A | N/A                                                         | N/A                                                                                                 | N/A                                                                         | Unknown protein      | 0 | 0 | 0 |
| A357L  | 2E+05 | 2E+05 | 82 | 987  | 328 | 36796 | 4.0  | Early-Late | N/A | N/A | N/A                                                         | YP_001426005 [hypothetical protein FR483_N373L (Paramecium bursaria Chlorella virus FR483)]         | N/A                                                                         | Unknown protein      | 0 | 0 | 0 |







|        |       |       |    |      |     |       |      |            |     |     |                                   |                                                                                                        |     |                      |   |   |   |
|--------|-------|-------|----|------|-----|-------|------|------------|-----|-----|-----------------------------------|--------------------------------------------------------------------------------------------------------|-----|----------------------|---|---|---|
| a395bL | 2E+05 | 2E+05 | 64 | 138  | 45  | 5372  | 9.9  | N/A        | N/A | N/A | N/A                               | N/A                                                                                                    | N/A | Hypothetical protein | 0 | 0 | 0 |
| A396L  | 2E+05 | 2E+05 | 82 | 459  | 152 | 18281 | 7.9  | Early-Late | N/A | N/A | N/A                               | YP_001426451<br>[hypothetical protein FR483_N819R (Paramecium bursaria Chlorella virus FR483)] [3e-13] | N/A | Unknown protein      | 1 | 1 | 1 |
| A397R  | 2E+05 | 2E+05 | 86 | 459  | 152 | 18036 | 4.4  | Early      | N/A | N/A | N/A                               | N/A                                                                                                    | N/A | Unknown protein      | 0 | 0 | 0 |
| A398L  | 2E+05 | 2E+05 | 60 | 357  | 118 | 12987 | 9.9  | Late       | Yes | N/A | N/A                               | YP_001426210<br>[hypothetical protein FR483_N578R (Paramecium bursaria Chlorella virus FR483)] [1e-35] | N/A | Unknown protein      | 2 | 3 | 3 |
| a398aR | 2E+05 | 2E+05 | 54 | 180  | 59  | 6906  | 8.8  | N/A        | N/A | N/A | N/A                               | N/A                                                                                                    | N/A | Hypothetical protein | 0 | 0 | 0 |
| A399R  | 2E+05 | 2E+05 | 64 | 585  | 194 | 21832 | 8.9  | Early      | N/A | N/A | PF00075.17<br>[RNase H] [6.7e-19] | YP_001426207<br>[hypothetical protein FR483_N575L (Paramecium bursaria Chlorella virus FR483)] [9e-37] | N/A | Unknown protein      | 0 | 0 | 0 |
| A400R  | 2E+05 | 2E+05 | 78 | 357  | 118 | 13634 | 9.5  | Early-Late | Yes | N/A | N/A                               | YP_001426835<br>[hypothetical protein ATCV1_z354L (Acanthocystis turfacea Chlorella virus 1)] [3e-20]  | N/A | Unknown protein      | 0 | 0 | 0 |
| A401R  | 2E+05 | 2E+05 | 78 | 834  | 277 | 31433 | 6.8  | Early-Late | N/A | N/A | N/A                               | YP_001426204<br>[hypothetical protein FR483_N572L (Paramecium bursaria Chlorella virus FR483)] [2e-95] | N/A | Unknown protein      | 0 | 1 | 1 |
| A402R  | 2E+05 | 2E+05 | 78 | 684  | 227 | 25380 | 7.5  | Late       | N/A | N/A | N/A                               | YP_001426843<br>[hypothetical protein ATCV1_Z362R (Acanthocystis turfacea Chlorella virus 1)] [6e-67]  | N/A | Unknown protein      | 0 | 0 | 0 |
| A403R  | 2E+05 | 2E+05 | 78 | 282  | 93  | 10830 | 10.0 | Early-Late | N/A | N/A | N/A                               | YP_001426844<br>[hypothetical protein ATCV1_Z363R (Acanthocystis turfacea Chlorella virus 1)] [7e-20]  | N/A | Unknown protein      | 0 | 0 | 0 |
| A404R  | 2E+05 | 2E+05 | 88 | 576  | 191 | 22111 | 2.9  | Late       | N/A | N/A | N/A                               | YP_001426199<br>[hypothetical protein FR483_N567L (Paramecium bursaria Chlorella virus FR483)] [2e-13] | N/A | Unknown protein      | 1 | 1 | 1 |
| A404aL | 2E+05 | 2E+05 | 84 | 159  | 52  | 5910  | 4.9  | N/A        | N/A | N/A | N/A                               | N/A                                                                                                    | N/A | Hypothetical protein | 0 | 0 | 0 |
| A405R  | 2E+05 | 2E+05 | 6  | 1491 | 496 | 53502 | 10.3 | Late       | Yes | N/A | N/A                               | YP_001426197<br>[hypothetical protein FR483_N565L (Paramecium bursaria Chlorella virus FR483)] [1e-42] | N/A | Unknown protein      | 1 | 2 | 1 |

|       |       |       |    |      |     |       |      |            |     |                                           |                                               |                                                                                                     |                                                                                                                                 |                      |   |   |   |
|-------|-------|-------|----|------|-----|-------|------|------------|-----|-------------------------------------------|-----------------------------------------------|-----------------------------------------------------------------------------------------------------|---------------------------------------------------------------------------------------------------------------------------------|----------------------|---|---|---|
| a406L | 2E+05 | 2E+05 | 70 | 201  | 66  | 7386  | 9.7  | N/A        | N/A | N/A                                       | N/A                                           | N/A                                                                                                 | N/A                                                                                                                             | Hypothetical protein | 0 | 0 | 0 |
| A407L | 2E+05 | 2E+05 | 80 | 633  | 210 | 23382 | 8.9  | Late       | Yes | N/A                                       | N/A                                           | YP_001426955 [hypothetical protein ATCV1_Z474R (Acanthocystis turfacea Chlorella virus 1)] [2e-70]  | N/A                                                                                                                             | Unknown protein      | 1 | 2 | 2 |
| A408L | 2E+05 | 2E+05 | 56 | 834  | 277 | 30772 | 4.5  | Early-Late | N/A | N/A                                       | N/A                                           | YP_001426126 [hypothetical protein FR483_N494R (Paramecium bursaria Chlorella virus FR483)] [8e-48] | N/A                                                                                                                             | Unknown protein      | 0 | 0 | 0 |
| a409R | 2E+05 | 2E+05 | 44 | 249  | 82  | 9006  | 5.4  | N/A        | N/A | N/A                                       | N/A                                           | YP_001426951 [hypothetical protein ATCV1_z470L (Acanthocystis turfacea Chlorella virus 1)] [3e-06]  | N/A                                                                                                                             | Hypothetical protein | 1 | 2 | 1 |
| A410L | 2E+05 | 2E+05 | 72 | 333  | 110 | 13015 | 4.4  | Early      | N/A | N/A                                       | N/A                                           | YP_001426942 [hypothetical protein ATCV1_Z461L (Acanthocystis turfacea Chlorella virus 1)] [1e-26]  | N/A                                                                                                                             | Unknown protein      | 0 | 0 | 0 |
| A411R | 2E+05 | 2E+05 | 78 | 513  | 170 | 19584 | 4.6  | Late       | N/A | N/A                                       | N/A                                           | YP_001426120 [hypothetical protein FR483_N488R (Paramecium bursaria Chlorella virus FR483)] [3e-09] | N/A                                                                                                                             | Unknown protein      | 0 | 0 | 0 |
| A412R | 2E+05 | 2E+05 | 74 | 540  | 179 | 20539 | 7.4  | Early      | N/A | N/A                                       | N/A                                           | YP_001426947 [hypothetical protein ATCV1_Z466R (Acanthocystis turfacea Chlorella virus 1)] [3e-47]  | N/A                                                                                                                             | Unknown protein      | 0 | 0 | 0 |
| A413L | 2E+05 | 2E+05 | 80 | 735  | 244 | 26998 | 9.5  | Late       | Yes | N/A                                       | N/A                                           | YP_001426125 [hypothetical protein FR483_N493L (Paramecium bursaria Chlorella virus FR483)] [1e-29] | N/A                                                                                                                             | Unknown protein      | 2 | 2 | 2 |
| A414R | 2E+05 | 2E+05 | 48 | 282  | 93  | 10612 | 10.8 | Late       | Yes | N/A                                       | N/A                                           | YP_001426117 [hypothetical protein FR483_N485R (Paramecium bursaria Chlorella virus FR483)] [5e-11] | N/A                                                                                                                             | Unknown protein      | 2 | 2 | 2 |
| a415L | 2E+05 | 2E+05 | 66 | 210  | 69  | 7685  | 10.0 | N/A        | N/A | N/A                                       | N/A                                           | N/A                                                                                                 | N/A                                                                                                                             | Hypothetical protein | 0 | 1 | 1 |
| A416R | 2E+05 | 2E+05 | 82 | 567  | 188 | 22361 | 6.5  | Late       | N/A | COG1428 [Deoxynucleoside kinases] [8e-07] | PF01712.12 [Deoxynucleoside kinase] [1.1e-36] | YP_001426070 [hypothetical protein FR483_N436R (Paramecium bursaria Chlorella virus FR483)] [6e-48] | Q197D1 [RecName: FullPutative kinase protein 029R] [4e-21]                                                                      | Unknown protein      | 0 | 1 | 0 |
| A417L | 2E+05 | 2E+05 | 82 | 1290 | 429 | 48932 | 7.5  | Late       | N/A | N/A                                       | N/A                                           | YP_001426073 [hypothetical protein FR483_N441L (Paramecium bursaria Chlorella virus FR483)] [4e-52] | A6UWR5 [RecName: FullReplication factor C large subunit ShortRFC large subunit AltName: FullClamp loader large subunit] [1e-06] | Unknown protein      | 0 | 0 | 0 |

|        |       |       |    |      |     |       |      |            |     |     |                                                                              |                                                                                                     |                                                                     |                      |   |   |   |
|--------|-------|-------|----|------|-----|-------|------|------------|-----|-----|------------------------------------------------------------------------------|-----------------------------------------------------------------------------------------------------|---------------------------------------------------------------------|----------------------|---|---|---|
| a418R  | 2E+05 | 2E+05 | 62 | 240  | 79  | 9726  | 10.4 | N/A        | N/A | N/A | N/A                                                                          | N/A                                                                                                 | N/A                                                                 | Hypothetical protein | 2 | 2 | 2 |
| a419R  | 2E+05 | 2E+05 | 74 | 213  | 70  | 7892  | 5.6  | N/A        | N/A | N/A | N/A                                                                          | N/A                                                                                                 | N/A                                                                 | Hypothetical protein | 0 | 1 | 0 |
| A420L  | 2E+05 | 2E+05 | 82 | 213  | 70  | 7918  | 6.4  | Late       | Yes | N/A | N/A                                                                          | YP_001426933 [hypothetical protein ATCV1_Z452R (Acanthocystis turfacea Chlorella virus 1)] [5e-21]  | N/A                                                                 | Unknown protein      | 1 | 1 | 1 |
| A421R  | 2E+05 | 2E+05 | 10 | 297  | 98  | 11056 | 10.1 | Late       | Yes | N/A | N/A                                                                          | YP_001426078 [hypothetical protein FR483_N446R (Paramecium bursaria Chlorella virus FR483)] [2e-16] | N/A                                                                 | Unknown protein      | 1 | 1 | 1 |
| A422R  | 2E+05 | 2E+05 | 82 | 993  | 330 | 37736 | 9.6  | Early-Late | N/A | N/A | PF07463.4 [NUMOD4 motif] [5.7e-13] / PF01844.16 [HNH endonuclease] [1.4e-06] | YP_001426831 [hypothetical protein ATCV1_Z350L (Acanthocystis turfacea Chlorella virus 1)] [6e-15]  | Q5UPT4 [RecName: FullUncharacterized HNH endonuclease L247] [1e-12] | Unknown protein      | 0 | 0 | 0 |
| A422aR | 2E+05 | 2E+05 | 74 | 192  | 63  | 7880  | 9.7  | N/A        | N/A | N/A | N/A                                                                          | N/A                                                                                                 | N/A                                                                 | Hypothetical protein | 1 | 1 | 0 |
| A423R  | 2E+05 | 2E+05 | 72 | 474  | 157 | 18458 | 6.5  | Late       | Yes | N/A | N/A                                                                          | YP_001426081 [hypothetical protein FR483_N449R (Paramecium bursaria Chlorella virus FR483)] [3e-12] | N/A                                                                 | Unknown protein      | 0 | 1 | 0 |
| A424R  | 2E+05 | 2E+05 | 86 | 330  | 109 | 12637 | 11.3 | Late       | N/A | N/A | N/A                                                                          | N/A                                                                                                 | N/A                                                                 | Unknown protein      | 0 | 0 | 0 |
| a425L  | 2E+05 | 2E+05 | 58 | 189  | 62  | 7087  | 4.5  | N/A        | N/A | N/A | N/A                                                                          | N/A                                                                                                 | N/A                                                                 | Hypothetical protein | 2 | 2 | 2 |
| A426R  | 2E+05 | 2E+05 | 52 | 345  | 114 | 13391 | 5.0  | Late       | N/A | N/A | N/A                                                                          | YP_001426084 [hypothetical protein FR483_N452R (Paramecium bursaria Chlorella virus FR483)] [2e-17] | N/A                                                                 | Unknown protein      | 0 | 0 | 0 |
| A427L  | 2E+05 | 2E+05 | 76 | 360  | 119 | 13765 | 6.5  | Early      | N/A | N/A | PF00085.13 [Thioredoxin] [8.6e-12]                                           | YP_001426085 [hypothetical protein FR483_N453L (Paramecium bursaria Chlorella virus FR483)] [5e-14] | N/A                                                                 | Unknown protein      | 0 | 0 | 0 |
| A428L  | 2E+05 | 2E+05 | 80 | 438  | 145 | 15912 | 3.8  | Early-Late | N/A | N/A | N/A                                                                          | N/A                                                                                                 | N/A                                                                 | Unknown protein      | 0 | 0 | 0 |
| A429L  | 2E+05 | 2E+05 | 70 | 1431 | 476 | 55474 | 4.7  | Early      | N/A | N/A | N/A                                                                          | YP_001426092 [hypothetical protein FR483_N460L (Paramecium bursaria Chlorella virus FR483)] [6e-50] | N/A                                                                 | Unknown protein      | 0 | 0 | 0 |
| A430L  | 2E+05 | 2E+05 | 76 | 1314 | 437 | 48165 | 7.5  | Late       | Yes | N/A | PF04451.5 [Large eukaryotic DNA virus major capsid protein] [2.6e-90]        | YP_001426761 [hypothetical protein ATCV1_Z280L (Acanthocystis turfacea Chlorella virus 1)] [0.0]    | A7U6E9 [RecName: FullMajor capsid protein ShortMCP] [5e-90]         | Major capsid protein | 0 | 0 | 0 |
| A431L  | 2E+05 | 2E+05 | 64 | 201  | 66  | 7999  | 10.3 | Early      | N/A | N/A | N/A                                                                          | N/A                                                                                                 | N/A                                                                 | Unknown protein      | 0 | 0 | 0 |

|        |       |       |    |     |     |       |      |            |     |                                                        |                                                             |                                                                                                        |                                               |                      |   |   |   |
|--------|-------|-------|----|-----|-----|-------|------|------------|-----|--------------------------------------------------------|-------------------------------------------------------------|--------------------------------------------------------------------------------------------------------|-----------------------------------------------|----------------------|---|---|---|
| A432R  | 2E+05 | 2E+05 | 14 | 474 | 157 | 17358 | 10.1 | Late       | N/A | N/A                                                    | N/A                                                         | YP_001426109<br>[hypothetical protein FR483_N477R (Paramecium bursaria Chlorella virus FR483)] [9e-27] | N/A                                           | Unknown protein      | 0 | 0 | 0 |
| a433R  | 2E+05 | 2E+05 | 56 | 342 | 113 | 13111 | 9.9  | N/A        | N/A | N/A                                                    | N/A                                                         | N/A                                                                                                    | N/A                                           | Hypothetical protein | 0 | 0 | 0 |
| a433aR | 2E+05 | 2E+05 | 46 | 135 | 44  | 5413  | 10.8 | N/A        | N/A | N/A                                                    | N/A                                                         | N/A                                                                                                    | N/A                                           | Hypothetical protein | 0 | 0 | 0 |
| a434L  | 2E+05 | 2E+05 | 58 | 171 | 56  | 5966  | 9.4  | N/A        | N/A | N/A                                                    | N/A                                                         | N/A                                                                                                    | N/A                                           | Hypothetical protein | 0 | 0 | 0 |
| a434aR | 2E+05 | 2E+05 | 62 | 189 | 62  | 6769  | 9.5  | N/A        | N/A | N/A                                                    | N/A                                                         | N/A                                                                                                    | N/A                                           | Hypothetical protein | 0 | 0 | 0 |
| A436L  | 2E+05 | 2E+05 | 60 | 192 | 63  | 6932  | 13.0 | N/A        | Yes | N/A                                                    | PF08789.3<br>[PBCV-specific basic adaptor domain] [1.5e-16] | YP_001426679<br>[hypothetical protein ATCV1_Z198L (Acanthocystis turfacea Chlorella virus 1)] [3e-06]  | N/A                                           | Unknown protein      | 0 | 0 | 0 |
| A435R  | 2E+05 | 2E+05 | 30 | 192 | 63  | 6795  | 11.2 | Early      | N/A | N/A                                                    | N/A                                                         | YP_001426611<br>[hypothetical protein ATCV1_z130R (Acanthocystis turfacea Chlorella virus 1)] [1e-05]  | N/A                                           | Unknown protein      | 0 | 1 | 0 |
| A437L  | 2E+05 | 2E+05 | 76 | 312 | 103 | 10876 | 11.0 | Late       | Yes | N/A                                                    | PF05854.4 [Non-histone chromosomal protein MC1] [5.9e-07]   | YP_001426116<br>[hypothetical protein FR483_N484L (Paramecium bursaria Chlorella virus FR483)] [3e-30] | N/A                                           | Unknown protein      | 0 | 1 | 0 |
| A437aR | 2E+05 | 2E+05 | 40 | 153 | 50  | 5255  | 10.2 | N/A        | N/A | N/A                                                    | N/A                                                         | N/A                                                                                                    | N/A                                           | Hypothetical protein | 0 | 1 | 0 |
| A438L  | 2E+05 | 2E+05 | 86 | 237 | 78  | 8988  | 10.7 | Early-Late | Yes | COG0695<br>[Glutaredoxin and related proteins] [3e-06] | PF00462.17<br>[Glutaredoxin] [3e-10]                        | YP_001426068<br>[hypothetical protein FR483_N436R (Paramecium bursaria Chlorella virus FR483)] [8e-18] | Q1RHJ0 [RecName: Full Glutaredoxin-1] [3e-06] | Glutaredoxin         | 0 | 0 | 0 |
| A439R  | 2E+05 | 2E+05 | 34 | 339 | 112 | 12855 | 8.3  | N/A        | N/A | N/A                                                    | N/A                                                         | YP_001426616<br>[hypothetical protein ATCV1_Z135R (Acanthocystis turfacea Chlorella virus 1)] [8e-28]  | N/A                                           | Hypothetical protein | 3 | 3 | 2 |
| A439aR | 2E+05 | 2E+05 | 70 | 171 | 56  | 6279  | 6.6  | N/A        | N/A | N/A                                                    | N/A                                                         | N/A                                                                                                    | N/A                                           | Hypothetical protein | 1 | 1 | 1 |
| A440L  | 2E+05 | 2E+05 | 70 | 267 | 88  | 10112 | 11.1 | Early      | Yes | N/A                                                    | N/A                                                         | N/A                                                                                                    | N/A                                           | Unknown protein      | 0 | 0 | 0 |
| A441L  | 2E+05 | 2E+05 | 72 | 414 | 137 | 15531 | 4.4  | Early      | N/A | N/A                                                    | N/A                                                         | YP_001426062<br>[hypothetical protein FR483_N430L (Paramecium bursaria Chlorella virus FR483)] [1e-27] | N/A                                           | Unknown protein      | 0 | 0 | 0 |
| a442R  | 2E+05 | 2E+05 | 10 | 396 | 131 | 15348 | 8.2  | N/A        | N/A | N/A                                                    | N/A                                                         | N/A                                                                                                    | N/A                                           | Hypothetical protein | 0 | 0 | 0 |
| A443R  | 2E+05 | 2E+05 | 74 | 927 | 308 | 34961 | 5.3  | Early      | Yes | N/A                                                    | N/A                                                         | YP_001426065<br>[hypothetical protein FR483_N433R]                                                     | N/A                                           | Unknown protein      | 0 | 0 | 0 |

|        |       |       |    |      |     |       |      |                |     |                                                             |                                                                         |                                                                                                                     |                                                                                                              |                                                           |   |   |   |  |
|--------|-------|-------|----|------|-----|-------|------|----------------|-----|-------------------------------------------------------------|-------------------------------------------------------------------------|---------------------------------------------------------------------------------------------------------------------|--------------------------------------------------------------------------------------------------------------|-----------------------------------------------------------|---|---|---|--|
|        |       |       |    |      |     |       |      |                |     |                                                             |                                                                         | (Paramecium bursaria<br>Chlorella virus FR483)]<br>[2e-50]                                                          |                                                                                                              |                                                           |   |   |   |  |
| A444L  | 2E+05 | 2E+05 | 84 | 315  | 104 | 11654 | 5.2  | Late           | N/A | N/A                                                         | N/A                                                                     | YP_001426058<br>[hypothetical protein<br>FR483_N426R<br>(Paramecium bursaria<br>Chlorella virus FR483)]<br>[2e-06]  | N/A                                                                                                          | Unknown protein                                           | 0 | 0 | 0 |  |
| A445L  | 2E+05 | 2E+05 | 86 | 1389 | 462 | 52542 | 8.5  | Early          | N/A | COG0661<br>[Predicted<br>unusual protein<br>kinase] [5e-06] | PF03109.9<br>[ABC1 family]<br>[1.3e-29]                                 | YP_001426053<br>[hypothetical protein<br>FR483_N421R<br>(Paramecium bursaria<br>Chlorella virus FR483)]<br>[1e-168] | Q55884 [RecName:<br>FullUncharacterized<br>protein sll0095] [1e-<br>21]                                      | Unknown protein                                           | 0 | 0 | 0 |  |
| a446R  | 2E+05 | 2E+05 | 44 | 306  | 101 | 11199 | 9.4  | N/A            | N/A | N/A                                                         | N/A                                                                     | YP_001426569<br>[hypothetical protein<br>ATCV1_z088L<br>(Acanthocystis turfacea<br>Chlorella virus 1)] [5e-<br>12]  | N/A                                                                                                          | Hypothetical<br>protein                                   | 1 | 2 | 2 |  |
| a447R  | 2E+05 | 2E+05 | 46 | 300  | 99  | 10962 | 12.1 | N/A            | N/A | N/A                                                         | N/A                                                                     | YP_001426568<br>[hypothetical protein<br>ATCV1_z087L<br>(Acanthocystis turfacea<br>Chlorella virus 1)] [4e-<br>11]  | N/A                                                                                                          | Hypothetical<br>protein                                   | 0 | 2 | 0 |  |
| A447aR | 2E+05 | 2E+05 | 8  | 138  | 45  | 5187  | 4.6  | N/A            | N/A | N/A                                                         | N/A                                                                     | N/A                                                                                                                 | N/A                                                                                                          | Hypothetical<br>protein                                   | 0 | 1 | 0 |  |
| A448L  | 2E+05 | 2E+05 | 76 | 321  | 106 | 12369 | 10.4 | Late           | Yes | N/A                                                         | PF00085.13<br>[Thioredoxin]<br>[6.7e-16]                                | YP_001426562<br>[hypothetical protein<br>ATCV1_Z081L<br>(Acanthocystis turfacea<br>Chlorella virus 1)] [1e-<br>31]  | Q9XI01 [RecName:<br>FullProbable protein<br>disulfide-isomerase 1<br>ShortPDI 1 Flags:<br>Precursor] [1e-07] | Protein disulphide<br>isomerase with<br>heme binding site | 0 | 0 | 0 |  |
| a448aL | 2E+05 | 2E+05 | 40 | 144  | 47  | 5352  | 9.4  | N/A            | N/A | N/A                                                         | N/A                                                                     | N/A                                                                                                                 | N/A                                                                                                          | Hypothetical<br>protein                                   | 0 | 0 | 0 |  |
| A449R  | 2E+05 | 2E+05 | 70 | 582  | 193 | 22451 | 8.9  | Early          | N/A | N/A                                                         | PF02940.8<br>[mRNA capping<br>enzyme beta<br>chain] [3.1e-18]           | YP_001426048<br>[hypothetical protein<br>FR483_N416L<br>(Paramecium bursaria<br>Chlorella virus FR483)]<br>[5e-47]  | N/A                                                                                                          | Unknown protein                                           | 0 | 0 | 0 |  |
| A450R  | 2E+05 | 2E+05 | 86 | 750  | 249 | 28143 | 9.4  | Early          | N/A | N/A                                                         | PF07150.4<br>[Protein of<br>unknown function<br>(DUF1390)]<br>[2.5e-82] | YP_001426424<br>[hypothetical protein<br>FR483_N792R<br>(Paramecium bursaria<br>Chlorella virus FR483)]<br>[2e-29]  | N/A                                                                                                          | Unknown protein                                           | 0 | 0 | 0 |  |
| a451L  | 2E+05 | 2E+05 | 54 | 306  | 101 | 12174 | 10.4 | N/A            | N/A | N/A                                                         | N/A                                                                     | N/A                                                                                                                 | N/A                                                                                                          | Hypothetical<br>protein                                   | 0 | 2 | 0 |  |
| A452L  | 2E+05 | 2E+05 | 82 | 240  | 79  | 9447  | 4.2  | Early          | N/A | N/A                                                         | N/A                                                                     | N/A                                                                                                                 | N/A                                                                                                          | Unknown protein                                           | 0 | 0 | 0 |  |
| a453R  | 2E+05 | 2E+05 | 10 | 270  | 89  | 10218 | 7.4  | N/A            | N/A | N/A                                                         | N/A                                                                     | N/A                                                                                                                 | N/A                                                                                                          | Hypothetical<br>protein                                   | 0 | 0 | 0 |  |
| A454L  | 2E+05 | 2E+05 | 82 | 870  | 289 | 31194 | 4.7  | Early-<br>Late | Yes | N/A                                                         | N/A                                                                     | YP_001426311<br>[hypothetical protein<br>FR483_N679R<br>(Paramecium bursaria<br>Chlorella virus FR483)]<br>[1e-102] | N/A                                                                                                          | Unknown protein                                           | 1 | 1 | 0 |  |
| a455R  | 2E+05 | 2E+05 | 42 | 444  | 147 | 15433 | 7.9  | N/A            | N/A | N/A                                                         | N/A                                                                     | YP_001426312<br>[hypothetical protein                                                                               | N/A                                                                                                          | Hypothetical<br>protein                                   | 2 | 2 | 2 |  |

|               |       |       |    |      |     |       |      |                |     |                                                                                                                            |                                                                                                                   |                                                                                                                    |                                                                                                           |                         |   |   |   |  |
|---------------|-------|-------|----|------|-----|-------|------|----------------|-----|----------------------------------------------------------------------------------------------------------------------------|-------------------------------------------------------------------------------------------------------------------|--------------------------------------------------------------------------------------------------------------------|-----------------------------------------------------------------------------------------------------------|-------------------------|---|---|---|--|
|               |       |       |    |      |     |       |      |                |     |                                                                                                                            |                                                                                                                   | FR483_n680L<br>(Paramecium bursaria<br>Chlorella virus FR483)<br>[5e-12]                                           |                                                                                                           |                         |   |   |   |  |
| <b>A456L</b>  | 2E+05 | 2E+05 | 74 | 1965 | 654 | 75235 | 5.5  | Early          | Yes | COG3378<br>[Predicted<br>ATPase] [3e-06]                                                                                   | PF08706.4 [D5 N<br>terminal like]<br>[3.9e-09]                                                                    | YP_001426306<br>[hypothetical protein<br>FR483_N674R<br>(Paramecium bursaria<br>Chlorella virus FR483)<br>[0.0]    | N/A                                                                                                       | Unknown protein         | 0 | 0 | 0 |  |
| <b>a457R</b>  | 2E+05 | 2E+05 | 44 | 231  | 76  | 8771  | 12.0 | N/A            | N/A | N/A                                                                                                                        | N/A                                                                                                               | YP_001426309<br>[hypothetical protein<br>FR483_n677L<br>(Paramecium bursaria<br>Chlorella virus FR483)<br>[2e-06]  | N/A                                                                                                       | Hypothetical<br>protein | 0 | 0 | 0 |  |
| <b>a458L</b>  | 2E+05 | 2E+05 | 60 | 252  | 83  | 9651  | 12.6 | N/A            | N/A | N/A                                                                                                                        | N/A                                                                                                               | N/A                                                                                                                | N/A                                                                                                       | Hypothetical<br>protein | 0 | 0 | 0 |  |
| <b>a459R</b>  | 2E+05 | 2E+05 | 52 | 303  | 100 | 11291 | 10.5 | N/A            | N/A | N/A                                                                                                                        | N/A                                                                                                               | YP_001426309<br>[hypothetical protein<br>FR483_n677L<br>(Paramecium bursaria<br>Chlorella virus FR483)<br>[2e-22]  | N/A                                                                                                       | Hypothetical<br>protein | 0 | 0 | 0 |  |
| <b>a460R</b>  | 2E+05 | 2E+05 | 56 | 237  | 78  | 9235  | 11.2 | N/A            | N/A | N/A                                                                                                                        | N/A                                                                                                               | YP_001426548<br>[hypothetical protein<br>ATCV1_z067L<br>(Acanthocystis turfacea<br>Chlorella virus 1)] [5e-<br>11] | N/A                                                                                                       | Hypothetical<br>protein | 0 | 0 | 0 |  |
| <b>A461R</b>  | 2E+05 | 2E+05 | 54 | 234  | 77  | 8987  | 10.9 | N/A            | N/A | N/A                                                                                                                        | N/A                                                                                                               | N/A                                                                                                                | N/A                                                                                                       | Hypothetical<br>protein | 0 | 0 | 0 |  |
| <b>A462R</b>  | 2E+05 | 2E+05 | 36 | 216  | 71  | 8338  | 9.7  | Early-<br>Late | N/A | N/A                                                                                                                        | N/A                                                                                                               | N/A                                                                                                                | N/A                                                                                                       | Unknown protein         | 0 | 0 | 0 |  |
| <b>a463L</b>  | 2E+05 | 2E+05 | 54 | 576  | 191 | 22590 | 10.5 | N/A            | N/A | N/A                                                                                                                        | N/A                                                                                                               | N/A                                                                                                                | N/A                                                                                                       | Hypothetical<br>protein | 0 | 0 | 0 |  |
| <b>A464R</b>  | 2E+05 | 2E+05 | 50 | 828  | 275 | 31170 | 6.7  | Early          | N/A | COG0571<br>[dsRNA-specific<br>ribonuclease] [1e-<br>07]                                                                    | PF00636.19<br>[RNase3 domain]<br>[8.7e-21] /<br>PF00035.18<br>[Double-stranded<br>RNA binding<br>motif] [1.2e-11] | YP_001426302<br>[hypothetical protein<br>FR483_N670L<br>(Paramecium bursaria<br>Chlorella virus FR483)<br>[9e-98]  | Q8KAN7 [RecName:<br>FullRibonuclease 3<br>AltName:<br>FullRibonuclease III<br>ShortRNase III] [5e-<br>32] | Rnase III               | 0 | 0 | 0 |  |
| <b>A464aR</b> | 2E+05 | 2E+05 | 58 | 126  | 41  | 5049  | 11.2 | N/A            | N/A | N/A                                                                                                                        | N/A                                                                                                               | N/A                                                                                                                | N/A                                                                                                       | Hypothetical<br>protein | 0 | 0 | 0 |  |
| <b>A465R</b>  | 2E+05 | 2E+05 | 74 | 357  | 118 | 13528 | 10.2 | Early-<br>Late | Yes | COG5054<br>[Mitochondrial<br>sulfhydryl oxidase<br>involved in the<br>biogenesis of<br>cytosolic Fe/S<br>proteins] [4e-06] | PF04777.6 [Erv1<br>/ Alr family] [3.5e-<br>22]                                                                    | YP_001426300<br>[hypothetical protein<br>FR483_N668R<br>(Paramecium bursaria<br>Chlorella virus FR483)<br>[8e-42]  | Q5UQV6 [RecName:<br>FullProbable FAD-<br>linked sulfhydryl<br>oxidase R368] [3e-<br>12]                   | Unknown protein         | 0 | 0 | 0 |  |
| <b>a466L</b>  | 2E+05 | 2E+05 | 68 | 276  | 91  | 10518 | 8.9  | N/A            | N/A | N/A                                                                                                                        | N/A                                                                                                               | YP_001426543<br>[hypothetical protein<br>ATCV1_z062L<br>(Acanthocystis turfacea<br>Chlorella virus 1)] [5e-<br>15] | N/A                                                                                                       | Hypothetical<br>protein | 0 | 0 | 0 |  |
| <b>A467L</b>  | 2E+05 | 2E+05 | 78 | 939  | 312 | 36694 | 7.5  | Early-<br>Late | N/A | N/A                                                                                                                        | N/A                                                                                                               | YP_001426297<br>[hypothetical protein<br>FR483_N665R<br>(Paramecium bursaria<br>Chlorella virus FR483)]            | N/A                                                                                                       | Unknown protein         | 0 | 0 | 0 |  |









|       |       |       |    |      |     |       |      |            |     |                                               |                                                            |                                                                                                                     |                                                                                                                              |                      |   |   |   |
|-------|-------|-------|----|------|-----|-------|------|------------|-----|-----------------------------------------------|------------------------------------------------------------|---------------------------------------------------------------------------------------------------------------------|------------------------------------------------------------------------------------------------------------------------------|----------------------|---|---|---|
| A505L | 2E+05 | 2E+05 | 64 | 1455 | 484 | 54765 | 5.4  | Early      | N/A | N/A                                           | N/A                                                        | YP_001426328<br>[hypothetical protein<br>FR483_N696R<br>(Paramecium bursaria<br>Chlorella virus FR483)]<br>[1e-127] | N/A                                                                                                                          | Unknown protein      | 0 | 0 | 0 |
| a506R | 2E+05 | 2E+05 | 50 | 213  | 70  | 7759  | 10.4 | N/A        | N/A | N/A                                           | N/A                                                        | YP_001426333<br>[hypothetical protein<br>FR483_n701L<br>(Paramecium bursaria<br>Chlorella virus FR483)]<br>[9e-14]  | N/A                                                                                                                          | Hypothetical protein | 0 | 0 | 0 |
| a507R | 2E+05 | 2E+05 | 48 | 561  | 186 | 21950 | 10.5 | N/A        | N/A | N/A                                           | N/A                                                        | YP_001426327<br>[hypothetical protein<br>FR483_n695L<br>(Paramecium bursaria<br>Chlorella virus FR483)]<br>[2e-10]  | N/A                                                                                                                          | Hypothetical protein | 0 | 0 | 0 |
| a508R | 2E+05 | 2E+05 | 54 | 234  | 77  | 8501  | 11.8 | N/A        | N/A | N/A                                           | N/A                                                        | N/A                                                                                                                 | N/A                                                                                                                          | Hypothetical protein | 0 | 1 | 1 |
| a509R | 2E+05 | 2E+05 | 52 | 306  | 101 | 12606 | 10.4 | N/A        | N/A | N/A                                           | N/A                                                        | N/A                                                                                                                 | N/A                                                                                                                          | Hypothetical protein | 0 | 0 | 0 |
| a510R | 2E+05 | 2E+05 | 50 | 204  | 67  | 7609  | 10.0 | N/A        | N/A | N/A                                           | N/A                                                        | N/A                                                                                                                 | N/A                                                                                                                          | Hypothetical protein | 0 | 0 | 0 |
| a511L | 2E+05 | 2E+05 | 50 | 222  | 73  | 8589  | 9.4  | N/A        | N/A | N/A                                           | N/A                                                        | N/A                                                                                                                 | N/A                                                                                                                          | Hypothetical protein | 0 | 0 | 0 |
| A512R | 2E+05 | 2E+05 | 56 | 2415 | 804 | 89893 | 5.5  | Early      | N/A | N/A                                           | N/A                                                        | N/A                                                                                                                 | N/A                                                                                                                          | Unknown protein      | 0 | 0 | 0 |
| a513R | 2E+05 | 2E+05 | 56 | 363  | 120 | 13489 | 12.4 | N/A        | N/A | N/A                                           | N/A                                                        | N/A                                                                                                                 | N/A                                                                                                                          | Hypothetical protein | 2 | 3 | 3 |
| a514L | 2E+05 | 2E+05 | 62 | 435  | 144 | 15673 | 12.1 | N/A        | N/A | N/A                                           | N/A                                                        | N/A                                                                                                                 | N/A                                                                                                                          | Hypothetical protein | 1 | 2 | 1 |
| a515L | 2E+05 | 2E+05 | 44 | 612  | 203 | 22883 | 10.7 | N/A        | N/A | N/A                                           | N/A                                                        | N/A                                                                                                                 | N/A                                                                                                                          | Hypothetical protein | 0 | 0 | 0 |
| a516R | 2E+05 | 2E+05 | 44 | 207  | 68  | 7990  | 12.5 | N/A        | N/A | N/A                                           | N/A                                                        | N/A                                                                                                                 | N/A                                                                                                                          | Hypothetical protein | 2 | 2 | 2 |
| A517L | 2E+05 | 2E+05 | 86 | 1035 | 344 | 39045 | 8.8  | Early      | N/A | COG0270 [Site-specific DNA methylase] [9e-06] | PF00145.10 [C-5 cytosine-specific DNA methylase] [5.4e-40] | YP_001426001<br>[hypothetical protein<br>FR483_N369L<br>(Paramecium bursaria<br>Chlorella virus FR483)]<br>[1e-126] | P36216 [RecName: FullModification methylase CvJI ShortM.CvJI AltName: FullCytosine-specific methyltransferase CvJII] [9e-76] | Unknown protein      | 0 | 1 | 0 |
| a518R | 2E+05 | 2E+05 | 62 | 303  | 100 | 10825 | 9.3  | N/A        | N/A | N/A                                           | N/A                                                        | N/A                                                                                                                 | N/A                                                                                                                          | Hypothetical protein | 0 | 1 | 0 |
| A519L | 2E+05 | 2E+05 | 74 | 249  | 82  | 9332  | 9.8  | Late       | N/A | N/A                                           | N/A                                                        | YP_001425920<br>[hypothetical protein<br>FR483_N288R<br>(Paramecium bursaria<br>Chlorella virus FR483)]<br>[9e-16]  | N/A                                                                                                                          | Unknown protein      | 2 | 2 | 2 |
| A520L | 2E+05 | 2E+05 | 74 | 303  | 100 | 11674 | 10.7 | Late       | Yes | N/A                                           | N/A                                                        | N/A                                                                                                                 | N/A                                                                                                                          | Unknown protein      | 0 | 0 | 0 |
| A521L | 2E+05 | 2E+05 | 70 | 630  | 209 | 23738 | 11.4 | Early-Late | Yes | N/A                                           | N/A                                                        | YP_001426325<br>[hypothetical protein<br>FR483_N693R<br>(Paramecium bursaria<br>Chlorella virus FR483)]             | N/A                                                                                                                          | Unknown protein      | 0 | 0 | 0 |



|        |       |       |    |      |      |        |      |            |     |                                            |                                                        |                                                                                                      |                                                                                              |                          |   |   |   |
|--------|-------|-------|----|------|------|--------|------|------------|-----|--------------------------------------------|--------------------------------------------------------|------------------------------------------------------------------------------------------------------|----------------------------------------------------------------------------------------------|--------------------------|---|---|---|
| A533R  | 3E+05 | 3E+05 | 82 | 1125 | 374  | 40132  | 3.8  | Early-Late | Yes | N/A                                        | N/A                                                    | YP_001426965 [hypothetical protein ATCV1_z484R (Acanthocystis turfacea Chlorella virus 1)] [1e-117]  | N/A                                                                                          | Unknown protein          | 0 | 0 | 0 |
| A534R  | 3E+05 | 3E+05 | 56 | 318  | 105  | 11783  | 9.7  | N/A        | Yes | N/A                                        | N/A                                                    | YP_001426148 [hypothetical protein FR483_N516R (Paramecium bursaria Chlorella virus FR483)] [3e-37]  | N/A                                                                                          | Unknown protein          | 0 | 0 | 0 |
| A535L  | 3E+05 | 3E+05 | 82 | 216  | 71   | 8210   | 4.7  | Early-Late | Yes | N/A                                        | N/A                                                    | YP_001426150 [hypothetical protein FR483_N518L (Paramecium bursaria Chlorella virus FR483)] [7e-11]  | N/A                                                                                          | Unknown protein          | 0 | 0 | 0 |
| A536L  | 3E+05 | 3E+05 | 80 | 222  | 73   | 8485   | 10.0 | Early-Late | Yes | N/A                                        | N/A                                                    | YP_001426152 [hypothetical protein FR483_N520L (Paramecium bursaria Chlorella virus FR483)] [6e-09]  | N/A                                                                                          | Unknown protein          | 1 | 1 | 0 |
| a536aL | 3E+05 | 3E+05 | 48 | 177  | 58   | 6753   | 8.5  | N/A        | N/A | N/A                                        | N/A                                                    | N/A                                                                                                  | Hypothetical protein                                                                         | 1                        | 1 | 0 |   |
| A537L  | 3E+05 | 3E+05 | 78 | 798  | 265  | 31237  | 6.6  | Early      | N/A | N/A                                        | N/A                                                    | YP_001426153 [hypothetical protein FR483_N521L (Paramecium bursaria Chlorella virus FR483)] [1e-18]  | N/A                                                                                          | Unknown protein          | 0 | 0 | 0 |
| a538L  | 3E+05 | 3E+05 | 68 | 198  | 65   | 7367   | 9.9  | N/A        | N/A | N/A                                        | N/A                                                    | N/A                                                                                                  | Hypothetical protein                                                                         | 0                        | 1 | 0 |   |
| A539R  | 3E+05 | 3E+05 | 80 | 522  | 173  | 19839  | 10.1 | Early      | N/A | N/A                                        | PF01541.17 [GIY-YIG catalytic domain] [1.1e-06]        | YP_001426156 [hypothetical protein FR483_N524R (Paramecium bursaria Chlorella virus FR483)] [2e-46]  | N/A                                                                                          | Unknown protein          | 0 | 0 | 0 |
| a539aR | 3E+05 | 3E+05 | 64 | 165  | 54   | 6339   | 9.3  | N/A        | N/A | N/A                                        | N/A                                                    | N/A                                                                                                  | Hypothetical protein                                                                         | 0                        | 1 | 0 |   |
| A540L  | 3E+05 | 3E+05 | 82 | 3771 | 1256 | 127197 | 6.2  | Late       | Yes | N/A                                        | N/A                                                    | YP_001426157 [hypothetical protein FR483_N525L (Paramecium bursaria Chlorella virus FR483)] [1e-173] | N/A                                                                                          | Unknown protein          | 0 | 0 | 0 |
| a541R  | 3E+05 | 3E+05 | 52 | 291  | 96   | 10536  | 4.0  | N/A        | N/A | N/A                                        | N/A                                                    | N/A                                                                                                  | Hypothetical protein                                                                         | 0                        | 1 | 0 |   |
| a542R  | 3E+05 | 3E+05 | 48 | 219  | 72   | 9007   | 9.1  | N/A        | N/A | N/A                                        | N/A                                                    | N/A                                                                                                  | Hypothetical protein                                                                         | 0                        | 0 | 0 |   |
| A543L  | 3E+05 | 3E+05 | 58 | 168  | 55   | 5802   | 6.5  | Late       | N/A | N/A                                        | N/A                                                    | N/A                                                                                                  | Unknown protein                                                                              | 0                        | 2 | 1 |   |
| A544R  | 3E+05 | 3E+05 | 52 | 897  | 298  | 34250  | 8.2  | Late       | N/A | COG1793 [ATP-dependent DNA ligase] [5e-11] | PF01068.14 [ATP-dependent DNA ligase domain] [1.3e-22] | YP_001426668 [hypothetical protein ATCV1_z187L (Acanthocystis turfacea Chlorella virus 1)] [1e-86]   | P44121 [RecName: FullDNA ligase AltName: FullPolydeoxyribonucleotide synthase (ATP)] [5e-10] | ATP-dependent DNA ligase | 0 | 0 | 0 |
| a545L  | 3E+05 | 3E+05 | 72 | 222  | 73   | 8111   | 10.0 | N/A        | N/A | N/A                                        | N/A                                                    | YP_001426667 [hypothetical protein ATCV1_z186R                                                       | N/A                                                                                          | Hypothetical protein     | 0 | 1 | 0 |



|        |       |       |    |      |     |       |      |            |     |     |                                                                             |                                                                                                        |                                                             |                      |   |   |   |
|--------|-------|-------|----|------|-----|-------|------|------------|-----|-----|-----------------------------------------------------------------------------|--------------------------------------------------------------------------------------------------------|-------------------------------------------------------------|----------------------|---|---|---|
| A558L  | 3E+05 | 3E+05 | 82 | 1203 | 400 | 45547 | 5.1  | Early-Late | Yes | N/A | PF04451.5<br>[Large eukaryotic DNA virus major capsid protein]<br>[6.6e-60] | YP_001426987<br>[hypothetical protein ATCV1_Z506L (Acanthocystis turfacea Chlorella virus 1)] [1e-156] | A7U6E9 [RecName: FullMajor capsid protein ShortMCP] [3e-47] | Capsid protein       | 0 | 0 | 0 |
| a558aL | 3E+05 | 3E+05 | 36 | 141  | 46  | 5526  | 5.3  | N/A        | N/A | N/A | N/A                                                                         | N/A                                                                                                    | N/A                                                         | Hypothetical protein | 1 | 1 | 1 |
| A559L  | 3E+05 | 3E+05 | 78 | 642  | 213 | 24034 | 10.2 | Late       | Yes | N/A | N/A                                                                         | YP_001425898<br>[hypothetical protein FR483_N266R (Paramecium bursaria Chlorella virus FR483)] [1e-16] | N/A                                                         | Unknown protein      | 1 | 1 | 0 |
| a560R  | 3E+05 | 3E+05 | 68 | 315  | 104 | 11524 | 8.3  | N/A        | N/A | N/A | N/A                                                                         | N/A                                                                                                    | N/A                                                         | Hypothetical protein | 2 | 2 | 2 |
| A561L  | 3E+05 | 3E+05 | 90 | 1950 | 649 | 71004 | 9.9  | Late       | Yes | N/A | N/A                                                                         | YP_001426992<br>[hypothetical protein ATCV1_Z511L (Acanthocystis turfacea Chlorella virus 1)] [4e-60]  | N/A                                                         | Unknown protein      | 1 | 2 | 1 |
| a562R  | 3E+05 | 3E+05 | 42 | 198  | 65  | 7690  | 11.4 | N/A        | N/A | N/A | N/A                                                                         | N/A                                                                                                    | N/A                                                         | Hypothetical protein | 0 | 0 | 0 |
| a563R  | 3E+05 | 3E+05 | 68 | 180  | 59  | 6418  | 10.4 | N/A        | N/A | N/A | N/A                                                                         | N/A                                                                                                    | N/A                                                         | Hypothetical protein | 1 | 1 | 1 |
| A564L  | 3E+05 | 3E+05 | 70 | 1056 | 351 | 39884 | 8.4  | Early-Late | N/A | N/A | N/A                                                                         | YP_001425778<br>[hypothetical protein FR483_N146R (Paramecium bursaria Chlorella virus FR483)] [5e-66] | N/A                                                         | Unknown protein      | 0 | 0 | 0 |
| A565R  | 3E+05 | 3E+05 | 70 | 2013 | 670 | 73169 | 7.3  | Early-Late | Yes | N/A | N/A                                                                         | YP_001425891<br>[hypothetical protein FR483_N259L (Paramecium bursaria Chlorella virus FR483)] [2e-69] | N/A                                                         | Unknown protein      | 1 | 1 | 1 |
| a566L  | 3E+05 | 3E+05 | 60 | 273  | 90  | 10337 | 7.7  | N/A        | N/A | N/A | N/A                                                                         | N/A                                                                                                    | N/A                                                         | Hypothetical protein | 0 | 0 | 0 |
| A567L  | 3E+05 | 3E+05 | 76 | 459  | 152 | 17418 | 10.1 | Early-Late | Yes | N/A | N/A                                                                         | YP_001425887<br>[hypothetical protein FR483_N255R (Paramecium bursaria Chlorella virus FR483)] [1e-12] | N/A                                                         | Unknown protein      | 0 | 0 | 0 |
| A568L  | 3E+05 | 3E+05 | 72 | 540  | 179 | 20899 | 7.5  | Early      | N/A | N/A | N/A                                                                         | YP_001426314<br>[hypothetical protein FR483_N682L (Paramecium bursaria Chlorella virus FR483)] [3e-10] | N/A                                                         | Unknown protein      | 1 | 1 | 2 |
| a569R  | 3E+05 | 3E+05 | 66 | 255  | 84  | 9639  | 9.5  | N/A        | N/A | N/A | N/A                                                                         | N/A                                                                                                    | N/A                                                         | Hypothetical protein | 2 | 2 | 1 |
| A570L  | 3E+05 | 3E+05 | 86 | 387  | 128 | 14556 | 4.8  | Late       | N/A | N/A | N/A                                                                         | YP_001426316<br>[hypothetical protein FR483_N684L (Paramecium bursaria Chlorella virus FR483)] [9e-38] | N/A                                                         | Unknown protein      | 0 | 0 | 0 |
| A571R  | 3E+05 | 3E+05 | 14 | 351  | 116 | 12972 | 12.0 | Late       | Yes | N/A | PF08789.3<br>[PBCV-specific basic adaptor]                                  | YP_001426112<br>[hypothetical protein FR483_N480R]                                                     | N/A                                                         | Unknown protein      | 0 | 0 | 0 |





|        |       |       |    |      |     |       |      |            |     |                                                                              |                                                                                   |                                                                                                      |                                                                                   |                      |   |   |   |
|--------|-------|-------|----|------|-----|-------|------|------------|-----|------------------------------------------------------------------------------|-----------------------------------------------------------------------------------|------------------------------------------------------------------------------------------------------|-----------------------------------------------------------------------------------|----------------------|---|---|---|
|        |       |       |    |      |     |       |      |            |     | topoisomerase (DNA gyrase/topo II topoisomerase IV) B subunit [2e-08]        | [1.4e-22] / PF00521.13 [DNA gyrase/topoisomerase IV subunit A] [6.5e-124]         | FR483_N549R (Paramecium bursaria Chlorella virus FR483) [0.0]                                        | topoisomerase 2 AltName: FullDNA topoisomerase II [0.0]                           |                      |   |   |   |
| a584R  | 3E+05 | 3E+05 | 56 | 297  | 98  | 11326 | 11.9 | N/A        | N/A | N/A                                                                          | N/A                                                                               | N/A                                                                                                  | N/A                                                                               | Hypothetical protein | 0 | 0 | 0 |
| a585R  | 3E+05 | 3E+05 | 62 | 240  | 79  | 9304  | 9.1  | N/A        | N/A | N/A                                                                          | N/A                                                                               | N/A                                                                                                  | N/A                                                                               | Hypothetical protein | 0 | 0 | 0 |
| A586R  | 3E+05 | 3E+05 | 62 | 228  | 75  | 8567  | 11.8 | N/A        | Yes | N/A                                                                          | N/A                                                                               | YP_001426187 [hypothetical protein FR483_n555L (Paramecium bursaria Chlorella virus FR483)] [1e-11]  | N/A                                                                               | Unknown protein      | 0 | 0 | 0 |
| a587R  | 3E+05 | 3E+05 | 60 | 345  | 114 | 12877 | 8.3  | N/A        | N/A | N/A                                                                          | N/A                                                                               | N/A                                                                                                  | N/A                                                                               | Hypothetical protein | 0 | 0 | 0 |
| a588R  | 3E+05 | 3E+05 | 42 | 351  | 116 | 13729 | 11.2 | N/A        | N/A | N/A                                                                          | N/A                                                                               | N/A                                                                                                  | N/A                                                                               | Hypothetical protein | 0 | 1 | 0 |
| a589L  | 3E+05 | 3E+05 | 56 | 231  | 76  | 8638  | 12.5 | N/A        | N/A | N/A                                                                          | N/A                                                                               | N/A                                                                                                  | N/A                                                                               | Hypothetical protein | 0 | 0 | 0 |
| A589aL | 3E+05 | 3E+05 | 80 | 153  | 50  | 5921  | 8.5  | N/A        | N/A | N/A                                                                          | N/A                                                                               | N/A                                                                                                  | N/A                                                                               | Hypothetical protein | 0 | 0 | 0 |
| A590L  | 3E+05 | 3E+05 | 84 | 1047 | 348 | 42036 | 4.6  | Early-Late | N/A | N/A                                                                          | N/A                                                                               | N/A                                                                                                  | N/A                                                                               | Unknown protein      | 0 | 0 | 0 |
| A590aL | 3E+05 | 3E+05 | 44 | 126  | 41  | 4735  | 12.1 | N/A        | N/A | N/A                                                                          | N/A                                                                               | N/A                                                                                                  | N/A                                                                               | Hypothetical protein | 1 | 1 | 1 |
| a591L  | 3E+05 | 3E+05 | 68 | 168  | 55  | 6171  | 10.3 | N/A        | N/A | N/A                                                                          | N/A                                                                               | N/A                                                                                                  | N/A                                                                               | Hypothetical protein | 1 | 1 | 1 |
| A592R  | 3E+05 | 3E+05 | 82 | 210  | 69  | 7861  | 4.7  | Early-Late | N/A | N/A                                                                          | N/A                                                                               | N/A                                                                                                  | N/A                                                                               | Unknown protein      | 0 | 0 | 0 |
| A593R  | 3E+05 | 3E+05 | 74 | 900  | 299 | 32019 | 7.1  | N/A        | N/A | N/A                                                                          | N/A                                                                               | YP_001426230 [hypothetical protein FR483_N598R (Paramecium bursaria Chlorella virus FR483)] [3e-35]  | N/A                                                                               | Hypothetical protein | 0 | 0 | 0 |
| a594R  | 3E+05 | 3E+05 | 42 | 351  | 116 | 14065 | 12.9 | N/A        | N/A | N/A                                                                          | N/A                                                                               | N/A                                                                                                  | N/A                                                                               | Hypothetical protein | 0 | 0 | 0 |
| a595L  | 3E+05 | 3E+05 | 56 | 255  | 84  | 9195  | 7.5  | N/A        | N/A | N/A                                                                          | N/A                                                                               | N/A                                                                                                  | N/A                                                                               | Hypothetical protein | 2 | 2 | 2 |
| A596R  | 3E+05 | 3E+05 | 78 | 429  | 142 | 15892 | 6.5  | Early-Late | N/A | COG2131 [Deoxycytidylate deaminase] [9e-07]                                  | PF00383.15 [Cytidine and deoxycytidylate deaminase zinc-binding region] [1.1e-26] | YP_001427097 [hypothetical protein ATCV1_2616L (Acanthocystis turfacea Chlorella virus 1)] [2e-56]   | P33968 [RecName: FullUncharacterized deaminase in luxG 3region] [1e-19]           | Unknown protein      | 0 | 0 | 0 |
| a597L  | 3E+05 | 3E+05 | 54 | 297  | 98  | 10825 | 6.5  | N/A        | N/A | N/A                                                                          | N/A                                                                               | N/A                                                                                                  | N/A                                                                               | Hypothetical protein | 0 | 0 | 0 |
| A598L  | 3E+05 | 3E+05 | 84 | 1092 | 363 | 41558 | 6.9  | Early-Late | Yes | COG0076 [Glutamate decarboxylase and related PLP-dependent proteins] [5e-06] | PF00282.12 [Pyridoxal-dependent decarboxylase conserved domain] [1.1e-17]         | YP_001426232 [hypothetical protein FR483_N600L (Paramecium bursaria Chlorella virus FR483)] [1e-132] | P54772 [RecName: FullHistidine decarboxylase ShortHDC AltName: FullTOM92] [3e-53] | Unknown protein      | 0 | 0 | 0 |

|        |       |       |    |      |     |       |      |            |     |                                                                  |                                                                                                                                                                                                                                                                  |                                                                                                      |                                                                                                                  |                           |   |   |   |
|--------|-------|-------|----|------|-----|-------|------|------------|-----|------------------------------------------------------------------|------------------------------------------------------------------------------------------------------------------------------------------------------------------------------------------------------------------------------------------------------------------|------------------------------------------------------------------------------------------------------|------------------------------------------------------------------------------------------------------------------|---------------------------|---|---|---|
| a599R  | 3E+05 | 3E+05 | 62 | 540  | 179 | 21558 | 8.7  | N/A        | N/A | N/A                                                              | N/A                                                                                                                                                                                                                                                              | N/A                                                                                                  | N/A                                                                                                              | Hypothetical protein      | 0 | 0 | 0 |
| a600R  | 3E+05 | 3E+05 | 52 | 249  | 82  | 9151  | 11.8 | N/A        | N/A | N/A                                                              | N/A                                                                                                                                                                                                                                                              | N/A                                                                                                  | N/A                                                                                                              | Hypothetical protein      | 0 | 1 | 1 |
| a600aR | 3E+05 | 3E+05 | 58 | 141  | 46  | 5877  | 8.2  | N/A        | N/A | N/A                                                              | N/A                                                                                                                                                                                                                                                              | N/A                                                                                                  | N/A                                                                                                              | Hypothetical protein      | 0 | 0 | 0 |
| A601R  | 3E+05 | 3E+05 | 52 | 306  | 101 | 11592 | 10.6 | Early-Late | N/A | N/A                                                              | N/A                                                                                                                                                                                                                                                              | YP_001426767 [hypothetical protein ATCV1_z286L (Acanthocystis turfacea Chlorella virus 1)] [5e-19]   | N/A                                                                                                              | Unknown protein           | 0 | 2 | 2 |
| A602L  | 3E+05 | 3E+05 | 60 | 606  | 201 | 23569 | 5.1  | Early      | N/A | N/A                                                              | N/A                                                                                                                                                                                                                                                              | YP_001426587 [hypothetical protein ATCV1_z106R (Acanthocystis turfacea Chlorella virus 1)] [3e-14]   | N/A                                                                                                              | Unknown protein           | 0 | 0 | 0 |
| a603R  | 3E+05 | 3E+05 | 78 | 318  | 105 | 12141 | 4.6  | N/A        | N/A | N/A                                                              | N/A                                                                                                                                                                                                                                                              | YP_001426236 [hypothetical protein FR483_N604R (Paramecium bursaria Chlorella virus FR483)] [6e-20]  | N/A                                                                                                              | Hypothetical protein      | 0 | 0 | 0 |
| A603aL | 3E+05 | 3E+05 | 72 | 186  | 61  | 6697  | 8.5  | N/A        | N/A | N/A                                                              | N/A                                                                                                                                                                                                                                                              | N/A                                                                                                  | N/A                                                                                                              | Hypothetical protein      | 2 | 2 | 2 |
| a603bR | 3E+05 | 3E+05 | 72 | 147  | 48  | 5317  | 4.1  | N/A        | N/A | N/A                                                              | N/A                                                                                                                                                                                                                                                              | N/A                                                                                                  | N/A                                                                                                              | Hypothetical protein      | 1 | 1 | 0 |
| A604L  | 3E+05 | 3E+05 | 80 | 405  | 134 | 15162 | 9.9  | Early      | N/A | N/A                                                              | N/A                                                                                                                                                                                                                                                              | N/A                                                                                                  | N/A                                                                                                              | Unknown protein           | 0 | 3 | 0 |
| A605L  | 3E+05 | 3E+05 | 80 | 477  | 158 | 17769 | 10.9 | Early-Late | Yes | N/A                                                              | N/A                                                                                                                                                                                                                                                              | N/A                                                                                                  | N/A                                                                                                              | Unknown protein           | 1 | 1 | 1 |
| a606L  | 3E+05 | 3E+05 | 50 | 345  | 114 | 13257 | 10.8 | N/A        | N/A | N/A                                                              | N/A                                                                                                                                                                                                                                                              | N/A                                                                                                  | N/A                                                                                                              | Hypothetical protein      | 0 | 1 | 1 |
| A607R  | 3E+05 | 3E+05 | 12 | 1176 | 391 | 46171 | 7.2  | Early-Late | N/A | N/A                                                              | N/A                                                                                                                                                                                                                                                              | YP_001426342 [hypothetical protein FR483_N710R (Paramecium bursaria Chlorella virus FR483)] [9e-77]  | Q02357 [RecName: FullAnkyrin-1 ShortANK-1 AltName: FullErythrocyte ankyrin] [3e-06]                              | Unknown protein           | 0 | 0 | 0 |
| A609L  | 3E+05 | 3E+05 | 82 | 1170 | 389 | 43459 | 4.7  | Early      | N/A | COG0677 [UDP-N-acetyl-D-mannosaminuronate dehydrogenase] [2e-06] | PF03721.7 [UDP-glucose/GDP-mannose dehydrogenase family NAD binding domain] [8.7e-41] / PF00984.12 [UDP-glucose/GDP-mannose dehydrogenase family central domain] [5.8e-23] / PF03720.8 [UDP-glucose/GDP-mannose dehydrogenase family UDP binding domain] [5e-08] | YP_001426344 [hypothetical protein FR483_N712L (Paramecium bursaria Chlorella virus FR483)] [1e-133] | O33952 [RecName: FullUDP-glucose 6-dehydrogenase ShortUDP-Glc dehydrogenase ShortUDP-GlcDH ShortUDPGDH] [1e-119] | UDP-glucose dehydrogenase | 0 | 0 | 0 |

|        |       |       |    |      |     |       |      |            |     |                                                  |                                                                       |                                                                                                      |                                                                                                         |                         |   |   |   |
|--------|-------|-------|----|------|-----|-------|------|------------|-----|--------------------------------------------------|-----------------------------------------------------------------------|------------------------------------------------------------------------------------------------------|---------------------------------------------------------------------------------------------------------|-------------------------|---|---|---|
| a610R  | 3E+05 | 3E+05 | 66 | 276  | 91  | 10725 | 8.8  | N/A        | N/A | N/A                                              | N/A                                                                   | N/A                                                                                                  | N/A                                                                                                     | Hypothetical protein    | 0 | 0 | 0 |
| a611R  | 3E+05 | 3E+05 | 62 | 225  | 74  | 8698  | 8.1  | N/A        | N/A | N/A                                              | N/A                                                                   | N/A                                                                                                  | N/A                                                                                                     | Hypothetical protein    | 0 | 0 | 0 |
| A612L  | 3E+05 | 3E+05 | 78 | 360  | 119 | 13587 | 8.7  | Late       | Yes | COG2940 [Proteins containing SET domain] [1e-06] | PF00856.21 [SET domain] [1.2e-12]                                     | YP_001426351 [hypothetical protein FR483_N719L (Paramecium bursaria Chlorella virus FR483)] [3e-33]  | Q0U3A4 [RecName: FullHistone-lysine N-methyltransferase SET9 AllName: FullSET domain protein 9] [4e-07] | Histone H3K27 methylase | 0 | 0 | 0 |
| a613R  | 3E+05 | 3E+05 | 54 | 264  | 87  | 10383 | 10.9 | N/A        | N/A | N/A                                              | N/A                                                                   | N/A                                                                                                  | N/A                                                                                                     | Hypothetical protein    | 0 | 1 | 0 |
| A614L  | 3E+05 | 3E+05 | 86 | 1734 | 577 | 64733 | 11.2 | Late       | Yes | N/A                                              | PF00069.18 [Protein kinase domain] [5.6e-11]                          | YP_001426352 [hypothetical protein FR483_N720L (Paramecium bursaria Chlorella virus FR483)] [1e-100] | N/A                                                                                                     | Protein kinase          | 0 | 0 | 0 |
| a615R  | 3E+05 | 3E+05 | 66 | 201  | 66  | 7112  | 9.1  | N/A        | N/A | N/A                                              | N/A                                                                   | N/A                                                                                                  | N/A                                                                                                     | Hypothetical protein    | 0 | 1 | 0 |
| a616R  | 3E+05 | 3E+05 | 60 | 282  | 93  | 9978  | 7.8  | N/A        | N/A | N/A                                              | N/A                                                                   | N/A                                                                                                  | N/A                                                                                                     | Hypothetical protein    | 0 | 1 | 0 |
| A617R  | 3E+05 | 3E+05 | 34 | 966  | 321 | 37586 | 9.9  | Early-Late | Yes | N/A                                              | N/A                                                                   | YP_001426356 [hypothetical protein FR483_N724R (Paramecium bursaria Chlorella virus FR483)] [3e-82]  | Q5UQJ6 [RecName: FullPutative serine/threonine-protein kinase R400] [7e-12]                             | Unknown protein         | 0 | 0 | 0 |
| A618L  | 3E+05 | 3E+05 | 70 | 396  | 131 | 15223 | 3.8  | Late       | N/A | N/A                                              | N/A                                                                   | YP_001426357 [hypothetical protein FR483_N725L (Paramecium bursaria Chlorella virus FR483)] [3e-14]  | N/A                                                                                                     | Unknown protein         | 0 | 0 | 0 |
| A619L  | 3E+05 | 3E+05 | 84 | 714  | 237 | 26943 | 4.5  | Late       | N/A | N/A                                              | N/A                                                                   | N/A                                                                                                  | N/A                                                                                                     | Unknown protein         | 0 | 0 | 0 |
| A620L  | 3E+05 | 3E+05 | 86 | 252  | 83  | 9739  | 9.6  | Late       | N/A | N/A                                              | N/A                                                                   | YP_001426363 [hypothetical protein FR483_N731L (Paramecium bursaria Chlorella virus FR483)] [1e-16]  | N/A                                                                                                     | Unknown protein         | 2 | 2 | 2 |
| a620aR | 3E+05 | 3E+05 | 56 | 174  | 57  | 6932  | 9.9  | N/A        | N/A | N/A                                              | N/A                                                                   | N/A                                                                                                  | N/A                                                                                                     | Hypothetical protein    | 0 | 0 | 0 |
| A621L  | 3E+05 | 3E+05 | 84 | 354  | 117 | 12935 | 9.5  | Late       | Yes | N/A                                              | N/A                                                                   | YP_001427169 [hypothetical protein ATCV1_z688R (Acanthocystis turfacea Chlorella virus 1)] [4e-35]   | N/A                                                                                                     | Unknown protein         | 2 | 2 | 2 |
| a621aR | 3E+05 | 3E+05 | 76 | 168  | 55  | 6081  | 4.0  | N/A        | N/A | N/A                                              | N/A                                                                   | N/A                                                                                                  | N/A                                                                                                     | Hypothetical protein    | 1 | 1 | 1 |
| a621bL | 3E+05 | 3E+05 | 56 | 141  | 46  | 5224  | 10.4 | N/A        | N/A | N/A                                              | N/A                                                                   | N/A                                                                                                  | N/A                                                                                                     | Hypothetical protein    | 0 | 1 | 0 |
| A622L  | 3E+05 | 3E+05 | 80 | 1563 | 520 | 58097 | 5.7  | Late       | Yes | N/A                                              | PF04451.5 [Large eukaryotic DNA virus major capsid protein] [1.7e-66] | YP_001426369 [hypothetical protein FR483_N737L (Paramecium bursaria Chlorella virus FR483)] [0.0]    | A7U6E9 [RecName: FullMajor capsid protein ShortMCP] [9e-57]                                             | Capsid protein          | 0 | 0 | 0 |

|        |       |       |    |      |     |       |      |            |     |                                                           |                                                                                                                                                                    |                                                                                                      |                                                                                                                                    |                      |   |   |   |
|--------|-------|-------|----|------|-----|-------|------|------------|-----|-----------------------------------------------------------|--------------------------------------------------------------------------------------------------------------------------------------------------------------------|------------------------------------------------------------------------------------------------------|------------------------------------------------------------------------------------------------------------------------------------|----------------------|---|---|---|
| A623L  | 3E+05 | 3E+05 | 72 | 204  | 67  | 7703  | 9.2  | Early      | N/A | N/A                                                       | PF01428.9 [AN1-like Zinc finger] [1.7e-12]                                                                                                                         | XP_002466323 [hypothetical protein SORBIDRAFT_01g005640 (Sorghum bicolor)] [2e-07]                   | Q852K6 [RecName: FullZinc finger A20 and AN1 domain-containing stress-associated protein 7 ShortOSAP7] [2e-08]                     | Unknown protein      | 0 | 0 | 0 |
| A623aL | 3E+05 | 3E+05 | 56 | 180  | 59  | 6781  | 4.5  | N/A        | N/A | N/A                                                       | N/A                                                                                                                                                                | N/A                                                                                                  | N/A                                                                                                                                | Hypothetical protein | 1 | 1 | 1 |
| A624R  | 3E+05 | 3E+05 | 32 | 366  | 121 | 13570 | 9.3  | Late       | Yes | N/A                                                       | PF09945.2 [Predicted membrane protein (DUF2177)] [3.4e-26]                                                                                                         | YP_001426373 [hypothetical protein FR483_N741R (Paramecium bursaria Chlorella virus FR483)] [2e-21]  | N/A                                                                                                                                | Unknown protein      | 3 | 4 | 3 |
| A625R  | 3E+05 | 3E+05 | 72 | 1299 | 432 | 49945 | 10.7 | Late       | Yes | COG0675 [Transposase and inactivated derivatives] [1e-06] | PF12323.1 [Helix-turn-helix domain] [1.4e-06] / PF07282.4 [Putative transposase DNA-binding domain] [6.7e-18]                                                      | ZP_03272524 [transposase IS605 OrfB family (Arthrospira maxima CS-326)] [2e-20]                      | Q5UPI0 [RecName: FullPutative transposase R104] [8e-19]                                                                            | Unknown protein      | 0 | 0 | 0 |
| a626L  | 3E+05 | 3E+05 | 48 | 225  | 74  | 8395  | 9.8  | N/A        | N/A | N/A                                                       | N/A                                                                                                                                                                | N/A                                                                                                  | N/A                                                                                                                                | Hypothetical protein | 0 | 0 | 0 |
| a626aR | 3E+05 | 3E+05 | 60 | 159  | 52  | 6068  | 11.2 | N/A        | N/A | N/A                                                       | N/A                                                                                                                                                                | N/A                                                                                                  | N/A                                                                                                                                | Hypothetical protein | 0 | 0 | 0 |
| A627R  | 3E+05 | 3E+05 | 68 | 1338 | 445 | 49629 | 11.1 | Late       | Yes | N/A                                                       | N/A                                                                                                                                                                | YP_001426405 [hypothetical protein FR483_N773L (Paramecium bursaria Chlorella virus FR483)] [1e-135] | N/A                                                                                                                                | Unknown protein      | 1 | 3 | 0 |
| a627aR | 3E+05 | 3E+05 | 54 | 138  | 45  | 5526  | 12.0 | N/A        | N/A | N/A                                                       | N/A                                                                                                                                                                | N/A                                                                                                  | N/A                                                                                                                                | Hypothetical protein | 0 | 0 | 0 |
| A628L  | 3E+05 | 3E+05 | 82 | 294  | 97  | 10499 | 4.5  | Early      | N/A | N/A                                                       | N/A                                                                                                                                                                | N/A                                                                                                  | N/A                                                                                                                                | Unknown protein      | 0 | 0 | 0 |
| A629R  | 3E+05 | 3E+05 | 74 | 2316 | 771 | 86292 | 7.5  | Early-Late | Yes | COG0209 [Ribonucleotide reductase alpha subunit] [4e-11]  | PF03477.9 [ATP cone domain] [8.5e-15] / PF00317.14 [Ribonucleotide reductase alpha domain] [7.9e-19] / PF02867.8 [Ribonucleotide reductase barrel domain] [2e-194] | YP_001426398 [hypothetical protein FR483_N766L (Paramecium bursaria Chlorella virus FR483)] [0.0]    | Q03604 [RecName: FullRibonucleoside-diphosphate reductase large subunit AltName: FullRibonucleotide reductase large subunit] [0.0] | Unknown protein      | 0 | 0 | 0 |
| a630R  | 3E+05 | 3E+05 | 50 | 240  | 79  | 9246  | 12.4 | N/A        | N/A | N/A                                                       | N/A                                                                                                                                                                | N/A                                                                                                  | N/A                                                                                                                                | Hypothetical protein | 0 | 0 | 0 |
| A631L  | 3E+05 | 3E+05 | 42 | 270  | 89  | 10392 | 9.9  | N/A        | Yes | N/A                                                       | N/A                                                                                                                                                                | YP_001426402 [hypothetical protein FR483_n770R (Paramecium bursaria Chlorella virus FR483)] [3e-08]  | N/A                                                                                                                                | Unknown protein      | 0 | 0 | 0 |
| a632L  | 3E+05 | 3E+05 | 64 | 219  | 72  | 7985  | 8.8  | N/A        | N/A | N/A                                                       | N/A                                                                                                                                                                | N/A                                                                                                  | N/A                                                                                                                                | Hypothetical protein | 1 | 1 | 2 |
| A633R  | 3E+05 | 3E+05 | 76 | 363  | 120 | 13184 | 9.2  | Late       | N/A | N/A                                                       | N/A                                                                                                                                                                | YP_001426396 [hypothetical protein FR483_N764L                                                       | N/A                                                                                                                                | Unknown protein      | 3 | 3 | 3 |



|        |       |       |    |     |     |       |      |            |     |     |                                                                                             |                                                                                                           |     |                      |   |   |   |
|--------|-------|-------|----|-----|-----|-------|------|------------|-----|-----|---------------------------------------------------------------------------------------------|-----------------------------------------------------------------------------------------------------------|-----|----------------------|---|---|---|
| A646aL | 3E+05 | 3E+05 | 84 | 126 | 41  | 5031  | 10.0 | N/A        | N/A | N/A | N/A                                                                                         | N/A                                                                                                       | N/A | Hypothetical protein | 1 | 1 | 1 |
| A647R  | 3E+05 | 3E+05 | 26 | 570 | 189 | 22158 | 8.3  | Early      | N/A | N/A | PF07150.4<br>[Protein of unknown function (DUF1390)]<br>[5.7e-46]                           | YP_001426682<br>[hypothetical protein ATCV1_Z201L (Acanthocystis turfacea Chlorella virus 1)] [1e-25]     | N/A | Unknown protein      | 0 | 0 | 0 |
| a648L  | 3E+05 | 3E+05 | 54 | 210 | 69  | 8097  | 8.2  | N/A        | N/A | N/A | N/A                                                                                         | N/A                                                                                                       | N/A | Hypothetical protein | 0 | 1 | 0 |
| A649R  | 3E+05 | 3E+05 | 68 | 780 | 259 | 28689 | 9.0  | Early      | N/A | N/A | PF07150.4<br>[Protein of unknown function (DUF1390)]<br>[9.1e-85]                           | YP_001426165<br>[hypothetical protein FR483_N533L (Paramecium bursaria Chlorella virus FR483)]<br>[6e-29] | N/A | Unknown protein      | 0 | 0 | 0 |
| a650L  | 3E+05 | 3E+05 | 72 | 264 | 87  | 10200 | 12.2 | N/A        | N/A | N/A | N/A                                                                                         | N/A                                                                                                       | N/A | Hypothetical protein | 0 | 0 | 0 |
| a650aL | 3E+05 | 3E+05 | 10 | 123 | 40  | 4447  | 7.5  | N/A        | N/A | N/A | N/A                                                                                         | N/A                                                                                                       | N/A | Hypothetical protein | 0 | 1 | 0 |
| a650bL | 3E+05 | 3E+05 | 72 | 177 | 58  | 6871  | 11.8 | N/A        | N/A | N/A | N/A                                                                                         | N/A                                                                                                       | N/A | Hypothetical protein | 0 | 0 | 0 |
| a650cR | 3E+05 | 3E+05 | 40 | 183 | 60  | 7437  | 9.6  | N/A        | N/A | N/A | N/A                                                                                         | N/A                                                                                                       | N/A | Hypothetical protein | 0 | 0 | 0 |
| A651L  | 3E+05 | 3E+05 | 80 | 693 | 230 | 26344 | 9.6  | Early-Late | N/A | N/A | PF01541.17<br>[GIY-YIG catalytic domain] [2.1e-06] / PF07453.6<br>[NUMOD1 domain] [1.3e-11] | YP_001426012<br>[hypothetical protein FR483_N380R (Paramecium bursaria Chlorella virus FR483)]<br>[5e-51] | N/A | Unknown protein      | 0 | 0 | 0 |
| a652R  | 3E+05 | 3E+05 | 38 | 228 | 75  | 8583  | 8.8  | N/A        | N/A | N/A | N/A                                                                                         | N/A                                                                                                       | N/A | Hypothetical protein | 1 | 1 | 0 |
| a653R  | 3E+05 | 3E+05 | 26 | 198 | 65  | 7565  | 9.4  | N/A        | N/A | N/A | N/A                                                                                         | N/A                                                                                                       | N/A | Hypothetical protein | 0 | 0 | 0 |
| A654L  | 3E+05 | 3E+05 | 78 | 594 | 197 | 22397 | 6.1  | Early      | N/A | N/A | PF00583.17<br>[Acetyltransferase (GNAT) family]<br>[6.8e-06]                                | YP_001426628<br>[hypothetical protein ATCV1_Z147L (Acanthocystis turfacea Chlorella virus 1)] [4e-53]     | N/A | Unknown protein      | 0 | 0 | 0 |
| A655L  | 3E+05 | 3E+05 | 66 | 321 | 106 | 12002 | 11.4 | N/A        | Yes | N/A | N/A                                                                                         | N/A                                                                                                       | N/A | Unknown protein      | 0 | 1 | 0 |
| A656L  | 3E+05 | 3E+05 | 82 | 723 | 240 | 26607 | 5.0  | Early      | N/A | N/A | PF01391.11<br>[Collagen triple helix repeat (20 copies)] [9.1e-11]                          | YP_001426629<br>[hypothetical protein ATCV1_Z148L (Acanthocystis turfacea Chlorella virus 1)] [2e-11]     | N/A | Unknown protein      | 2 | 2 | 2 |
| A658R  | 3E+05 | 3E+05 | 54 | 288 | 95  | 11136 | 8.1  | Late       | N/A | N/A | N/A                                                                                         | N/A                                                                                                       | N/A | Unknown protein      | 1 | 2 | 1 |
| A659L  | 3E+05 | 3E+05 | 86 | 579 | 192 | 21545 | 3.4  | Late       | N/A | N/A | N/A                                                                                         | YP_001427157<br>[hypothetical protein ATCV1_Z676R (Acanthocystis turfacea Chlorella virus 1)] [2e-12]     | N/A | Unknown protein      | 1 | 1 | 1 |
| a660R  | 3E+05 | 3E+05 | 58 | 333 | 110 | 13462 | 11.9 | N/A        | N/A | N/A | N/A                                                                                         | N/A                                                                                                       | N/A | Hypothetical protein | 0 | 0 | 0 |

|       |       |       |    |      |     |       |      |            |     |                                                                               |                                                                                                            |                                                                                                     |                                                                            |                        |   |   |   |
|-------|-------|-------|----|------|-----|-------|------|------------|-----|-------------------------------------------------------------------------------|------------------------------------------------------------------------------------------------------------|-----------------------------------------------------------------------------------------------------|----------------------------------------------------------------------------|------------------------|---|---|---|
| a661R | 3E+05 | 3E+05 | 58 | 309  | 102 | 11735 | 8.8  | N/A        | N/A | N/A                                                                           | N/A                                                                                                        | N/A                                                                                                 | N/A                                                                        | Hypothetical protein   | 1 | 1 | 1 |
| A662L | 3E+05 | 3E+05 | 74 | 516  | 171 | 19589 | 10.8 | Early-Late | N/A | N/A                                                                           | PF04117.5 [Mpv17 / PMP22 family] [2.1e-10]                                                                 | YP_001425817 [hypothetical protein FR483_N185L (Paramecium bursaria Chlorella virus FR483)] [1e-54] | Q54FR4 [RecName: FullPXMP2/4 family protein 4] [8e-08]                     | Unknown protein        | 2 | 4 | 2 |
| a663R | 3E+05 | 3E+05 | 52 | 240  | 79  | 9660  | 11.4 | N/A        | N/A | N/A                                                                           | N/A                                                                                                        | N/A                                                                                                 | N/A                                                                        | Hypothetical protein   | 0 | 0 | 0 |
| A664L | 3E+05 | 3E+05 | 80 | 465  | 154 | 17176 | 5.6  | Early      | N/A | N/A                                                                           | N/A                                                                                                        | YP_001425783 [hypothetical protein FR483_N151R (Paramecium bursaria Chlorella virus FR483)] [1e-42] | N/A                                                                        | Unknown protein        | 0 | 0 | 0 |
| A665L | 3E+05 | 3E+05 | 50 | 516  | 171 | 19498 | 9.8  | Early      | N/A | N/A                                                                           | N/A                                                                                                        | YP_001425783 [hypothetical protein FR483_N151R (Paramecium bursaria Chlorella virus FR483)] [1e-26] | N/A                                                                        | Unknown protein        | 0 | 0 | 0 |
| A666L | 3E+05 | 3E+05 | 74 | 2757 | 918 | ####  | 6.2  | Early      | N/A | COG1126 [ABC-type polar amino acid transport system ATPase component] [1e-05] | PF00005.20 [ABC transporter] [2.7e-15]                                                                     | YP_001426365 [hypothetical protein FR483_N733R (Paramecium bursaria Chlorella virus FR483)] [0.0]   | Q75EV6 [RecName: FullElongation factor 3 ShortEF-3] [0.0]                  | Unknown protein        | 0 | 0 | 0 |
| a667R | 3E+05 | 3E+05 | 52 | 291  | 96  | 10975 | 8.4  | N/A        | N/A | N/A                                                                           | N/A                                                                                                        | N/A                                                                                                 | N/A                                                                        | Hypothetical protein   | 2 | 1 | 0 |
| a668R | 3E+05 | 3E+05 | 50 | 198  | 65  | 7392  | 6.9  | N/A        | N/A | N/A                                                                           | N/A                                                                                                        | N/A                                                                                                 | N/A                                                                        | Hypothetical protein   | 0 | 0 | 0 |
| a669R | 3E+05 | 3E+05 | 50 | 252  | 83  | 9142  | 10.4 | N/A        | N/A | N/A                                                                           | N/A                                                                                                        | N/A                                                                                                 | N/A                                                                        | Hypothetical protein   | 0 | 0 | 0 |
| a670R | 3E+05 | 3E+05 | 46 | 369  | 122 | 13755 | 8.8  | N/A        | N/A | N/A                                                                           | N/A                                                                                                        | N/A                                                                                                 | N/A                                                                        | Hypothetical protein   | 0 | 0 | 0 |
| a671L | 3E+05 | 3E+05 | 78 | 294  | 97  | 11430 | 9.3  | N/A        | N/A | N/A                                                                           | N/A                                                                                                        | N/A                                                                                                 | N/A                                                                        | Hypothetical protein   | 0 | 1 | 1 |
| A672R | 3E+05 | 3E+05 | 80 | 636  | 211 | 23295 | 5.2  | Early      | N/A | COG0666 [FOG: Ankyrin repeat] [2e-06]                                         | PF00023.23 [Ankyrin repeat] [2.1e-09]                                                                      | YP_002840971 [Ankyrin (Sulfolobus islandicus Y.N.15.51)] [2e-26]                                    | Q4UMH6 [RecName: FullPutative ankyrin repeat protein RF_0381] [2e-17]      | Unknown protein        | 0 | 0 | 0 |
| a673L | 3E+05 | 3E+05 | 46 | 207  | 68  | 7488  | 4.3  | N/A        | N/A | N/A                                                                           | N/A                                                                                                        | N/A                                                                                                 | N/A                                                                        | Hypothetical protein   | 0 | 1 | 0 |
| A674R | 3E+05 | 3E+05 | 84 | 651  | 216 | 24902 | 8.1  | Early      | N/A | COG1351 [Predicted alternative thymidylate synthase] [5e-07]                  | PF02511.8 [Thymidylate synthase complementing protein] [6.2e-55]                                           | YP_001427299 [hypothetical protein ATCV1_2818L (Acanthocystis turfacea Chlorella virus 1)] [3e-78]  | P73053 [RecName: FullThymidylate synthase thyX ShortTS ShortTSase] [9e-57] | Thymidylate synthase X | 0 | 0 | 0 |
| a675L | 3E+05 | 3E+05 | 54 | 369  | 122 | 14417 | 8.8  | N/A        | N/A | N/A                                                                           | N/A                                                                                                        | N/A                                                                                                 | N/A                                                                        | Hypothetical protein   | 2 | 2 | 2 |
| A676R | 3E+05 | 3E+05 | 70 | 1125 | 374 | 42432 | 10.6 | Late       | Yes | N/A                                                                           | PF08789.3 [PBCV-specific basic adaptor domain] [1.9e-17] / PF08793.3 [2-cysteine adaptor domain] [1.8e-15] | YP_001425796 [hypothetical protein FR483_N164R (Paramecium bursaria Chlorella virus FR483)] [6e-55] | N/A                                                                        | Unknown protein        | 0 | 0 | 0 |



|        |       |       |    |      |     |       |      |            |     |                                               |                                                            |                                                                                                     |                                                                                                                           |                      |   |   |   |
|--------|-------|-------|----|------|-----|-------|------|------------|-----|-----------------------------------------------|------------------------------------------------------------|-----------------------------------------------------------------------------------------------------|---------------------------------------------------------------------------------------------------------------------------|----------------------|---|---|---|
| a677L  | 3E+05 | 3E+05 | 70 | 231  | 76  | 8171  | 4.2  | N/A        | N/A | N/A                                           | N/A                                                        | N/A                                                                                                 | N/A                                                                                                                       | Hypothetical protein | 0 | 1 | 0 |
| A678R  | 3E+05 | 3E+05 | 90 | 1158 | 385 | 41287 | 10.3 | Late       | Yes | N/A                                           | N/A                                                        | YP_001426663 [hypothetical protein ATCV1_Z182R (Acanthocystis turfacea Chlorella virus 1)] [7e-75]  | N/A                                                                                                                       | Unknown protein      | 0 | 3 | 0 |
| a679L  | 3E+05 | 3E+05 | 64 | 285  | 94  | 10193 | 11.5 | N/A        | N/A | N/A                                           | N/A                                                        | N/A                                                                                                 | N/A                                                                                                                       | Hypothetical protein | 0 | 0 | 0 |
| a680R  | 3E+05 | 3E+05 | 56 | 264  | 87  | 10337 | 3.6  | N/A        | N/A | N/A                                           | N/A                                                        | N/A                                                                                                 | N/A                                                                                                                       | Hypothetical protein | 0 | 0 | 0 |
| a681R  | 3E+05 | 3E+05 | 28 | 225  | 74  | 9708  | 13.4 | N/A        | N/A | N/A                                           | N/A                                                        | N/A                                                                                                 | N/A                                                                                                                       | Hypothetical protein | 0 | 0 | 0 |
| A681aL | 3E+05 | 3E+05 | 54 | 177  | 58  | 7012  | 10.1 | N/A        | N/A | N/A                                           | N/A                                                        | N/A                                                                                                 | N/A                                                                                                                       | Hypothetical protein | 0 | 1 | 0 |
| A682L  | 3E+05 | 3E+05 | 82 | 1107 | 368 | 39915 | 5.8  | Early      | N/A | COG0666 [FOG: Ankyrin repeat] [8e-06]         | PF00023.23 [Ankyrin repeat] [4.3e-10]                      | XP_001649474 [ankyrin 23/unc44 (Aedes aegypti)] [2e-51]                                             | Q54KA7 [RecName: FullAnkyrin repeat PH and SEC7 domain containing protein secG] [3e-46]                                   | Unknown protein      | 0 | 0 | 0 |
| a682aL | 3E+05 | 3E+05 | 52 | 138  | 45  | 5452  | 10.9 | N/A        | N/A | N/A                                           | N/A                                                        | N/A                                                                                                 | N/A                                                                                                                       | Hypothetical protein | 1 | 1 | 1 |
| a682bR | 3E+05 | 3E+05 | 38 | 144  | 47  | 5490  | 9.8  | N/A        | N/A | N/A                                           | N/A                                                        | N/A                                                                                                 | N/A                                                                                                                       | Hypothetical protein | 0 | 0 | 0 |
| A683L  | 3E+05 | 3E+05 | 74 | 1104 | 367 | 41847 | 7.9  | Early-Late | N/A | COG0270 [Site-specific DNA methylase] [1e-06] | PF00145.10 [C-5 cytosine-specific DNA methylase] [5.6e-66] | YP_001426001 [hypothetical protein FR483_N369L (Paramecium bursaria Chlorella virus FR483)] [4e-73] | P38216 [RecName: FullModification methylase CvJI ShortM.CvJI AltName: FullCytosine-specific methyltransferase CvJI] [0.0] | Unknown protein      | 0 | 0 | 0 |
| a684R  | 3E+05 | 3E+05 | 54 | 321  | 106 | 12535 | 8.8  | N/A        | N/A | N/A                                           | N/A                                                        | N/A                                                                                                 | N/A                                                                                                                       | Hypothetical protein | 0 | 0 | 0 |
| a685R  | 3E+05 | 3E+05 | 50 | 243  | 80  | 8650  | 6.4  | N/A        | N/A | N/A                                           | N/A                                                        | N/A                                                                                                 | N/A                                                                                                                       | Hypothetical protein | 0 | 0 | 0 |
| A686L  | 3E+05 | 3E+05 | 68 | 489  | 162 | 18316 | 6.9  | Early      | Yes | N/A                                           | N/A                                                        | N/A                                                                                                 | N/A                                                                                                                       | Unknown protein      | 0 | 1 | 0 |
| a686aL | 3E+05 | 3E+05 | 78 | 189  | 62  | 7504  | 8.2  | N/A        | N/A | N/A                                           | N/A                                                        | N/A                                                                                                 | N/A                                                                                                                       | Hypothetical protein | 0 | 0 | 0 |
| A685bR | 3E+05 | 3E+05 | 78 | 171  | 56  | 6326  | 9.5  | N/A        | N/A | N/A                                           | N/A                                                        | N/A                                                                                                 | N/A                                                                                                                       | Hypothetical protein | 0 | 0 | 0 |
| a685cL | 3E+05 | 3E+05 | 62 | 135  | 44  | 4817  | 9.6  | N/A        | N/A | N/A                                           | N/A                                                        | N/A                                                                                                 | N/A                                                                                                                       | Hypothetical protein | 0 | 0 | 0 |
| A687R  | 3E+05 | 3E+05 | 66 | 228  | 75  | 8976  | 4.4  | Early      | N/A | N/A                                           | N/A                                                        | N/A                                                                                                 | N/A                                                                                                                       | Unknown protein      | 0 | 0 | 0 |
| a688L  | 3E+05 | 3E+05 | 62 | 216  | 71  | 7957  | 12.4 | N/A        | N/A | N/A                                           | N/A                                                        | N/A                                                                                                 | N/A                                                                                                                       | Hypothetical protein | 0 | 1 | 0 |
| A689L  | 3E+05 | 3E+05 | 70 | 426  | 141 | 15974 | 8.5  | N/A        | N/A | N/A                                           | N/A                                                        | N/A                                                                                                 | N/A                                                                                                                       | Hypothetical protein | 0 | 1 | 1 |
| a690R  | 3E+05 | 3E+05 | 36 | 237  | 78  | 8746  | 9.1  | N/A        | N/A | N/A                                           | N/A                                                        | N/A                                                                                                 | N/A                                                                                                                       | Hypothetical protein | 0 | 0 | 0 |
| a690aL | 3E+05 | 3E+05 | 78 | 126  | 41  | 4982  | 10.3 | N/A        | N/A | N/A                                           | N/A                                                        | N/A                                                                                                 | N/A                                                                                                                       | Hypothetical protein | 1 | 1 | 1 |

|               |       |       |    |     |     |       |      |     |     |     |     |     |     |                      |   |   |   |
|---------------|-------|-------|----|-----|-----|-------|------|-----|-----|-----|-----|-----|-----|----------------------|---|---|---|
| <b>A690bL</b> | 3E+05 | 3E+05 | 78 | 144 | 47  | 5751  | 7.6  | N/A | N/A | N/A | N/A | N/A | N/A | Hypothetical protein | 1 | 1 | 1 |
| <b>a690cR</b> | 3E+05 | 3E+05 | 36 | 126 | 41  | 5159  | 10.5 | N/A | N/A | N/A | N/A | N/A | N/A | Hypothetical protein | 0 | 0 | 0 |
| <b>a690dR</b> | 3E+05 | 3E+05 | 40 | 132 | 43  | 4606  | 12.8 | N/A | N/A | N/A | N/A | N/A | N/A | Hypothetical protein | 0 | 0 | 0 |
| <b>A690eR</b> | 3E+05 | 3E+05 | 44 | 147 | 48  | 5331  | 11.2 | N/A | N/A | N/A | N/A | N/A | N/A | Hypothetical protein | 0 | 0 | 0 |
| <b>A690fR</b> | 3E+05 | 3E+05 | 0  | 162 | 53  | 6037  | 11.8 | N/A | N/A | N/A | N/A | N/A | N/A | Hypothetical protein | 0 | 0 | 0 |
| <b>a690gR</b> | 3E+05 | 3E+05 | 64 | 156 | 51  | 5820  | 9.3  | N/A | N/A | N/A | N/A | N/A | N/A | Hypothetical protein | 0 | 0 | 0 |
| <b>A691R</b>  | 3E+05 | 3E+05 | 66 | 552 | 183 | 21545 | 9.4  | N/A | N/A | N/A | N/A | N/A | N/A | Hypothetical protein | 0 | 0 | 0 |
| <b>a692R</b>  | 3E+05 | 3E+05 | 68 | 270 | 89  | 10191 | 9.1  | N/A | N/A | N/A | N/A | N/A | N/A | Hypothetical protein | 0 | 0 | 0 |

125 1 – Transmembrane regions of the protein were predicted by TMHMM (T), HMMTOP (H), and Phobius (P) methods. For all the method  
126 default parameters were used for the prediction. The number shown in the table is the number of helices predicted by the methods.

127 Table S2. PBCV-1 virionic proteome and mass spectral data from each method

|               |               | Proteomic Methods and Parameters |                 |                 |        |                 |                   |                |
|---------------|---------------|----------------------------------|-----------------|-----------------|--------|-----------------|-------------------|----------------|
| Protein       | Method number | Method 1                         |                 |                 |        | Method 2        |                   |                |
|               |               | Mascot score                     | Queries matched | Unique peptides | emPAI* | Unique peptides | Coverage fraction | Number spectra |
| A010R         | 1&2           | 3408                             | 53              | 25              | 6.21   | 19              | 0.5736            | 238            |
| A011L         | 1&2           | 8196                             | 113             | 29              | 13.68  | 22              | 0.7047            | 463            |
| A014R         | 1&2           | 160                              | 4               | 3               | 0.07   | 3               | 0.0226            | 20             |
| A025/027/029L | 1&2           | 161                              | 3               | 2               | 0.07   | 3               | 0.028             | 49             |
| A034R         | 1&2           | 839                              | 43              | 13              | 2.2    | 17              | 0.4838            | 232            |
| A035L         | 1&2           | 5397                             | 100             | 23              | 2.48   | 30              | 0.6058            | 1175           |
| A041R         | 1&2           | 1479                             | 32              | 13              | 1.72   | 15              | 0.4515            | 281            |
| A051L         | 1&2           | 690                              | 12              | 8               | 1.6    | 9               | 0.601             | 78             |
| A085R         | 1&2           | 1597                             | 24              | 12              | 3.8    | 11              | 0.5868            | 131            |
| A092/093L     | 1&2           | 1016                             | 25              | 16              | 1.62   | 11              | 0.3118            | 223            |
| A121R         | 1&2           | 41                               | 4               | 3               | 0.28   | 6               | 0.4327            | 70             |
| A127R         | 1&2           | 511                              | 17              | 8               | 0.77   | 9               | 0.3469            | 66             |
| A136R         | 1&2           | 109                              | 11              | 6               | 0.46   | 4               | 0.2877            | 126            |
| A139L         | 1&2           | 354                              | 11              | 4               | 1      | 8               | 0.4503            | 294            |
| A140 145R     | 1&2           | 11632                            | 241             | 46              | 3      | 58              | 0.5209            | 3522           |
| A165aL        | 1&2           | 491                              | 13              | 8               | 2.14   | 6               | 0.5337            | 134            |
| A168R         | 1&2           | 1439                             | 25              | 7               | 1.76   | 7               | 0.494             | 569            |
| A171R         | 1&2           | 405                              | 12              | 7               | 0.25   | 4               | 0.1809            | 13             |
| A176L         | 1&2           | 298                              | 5               | 2               | 0.9    | 4               | 0.3636            | 166            |
| A189 192R     | 1&2           | 1870                             | 58              | 29              | 0.5    | 30              | 0.3087            | 511            |
| A203R         | 1&2           | 1811                             | 37              | 10              | 4.46   | 7               | 0.5463            | 192            |
| A205R         | 1&2           | 664                              | 27              | 8               | 2.05   | 8               | 0.2427            | 302            |
| A213L         | 1&2           | 767                              | 12              | 8               | 4.4    | 5               | 0.5541            | 147            |
| A217L         | 1&2           | 844                              | 26              | 13              | 0.88   | 16              | 0.5025            | 174            |
| A227L         | 1&2           | 519                              | 17              | 5               | 1.19   | 4               | 0.365             | 128            |
| A230R         | 1&2           | 228                              | 6               | 4               | 0.76   | 5               | 0.2806            | 20             |
| A231L         | 1&2           | 313                              | 11              | 8               | 0.43   | 16              | 0.5561            | 139            |
| A237R         | 1&2           | 3551                             | 79              | 38              | 5.72   | 31              | 0.7297            | 724            |
| A245R         | 1&2           | 151                              | 5               | 4               | 0.59   | 4               | 0.369             | 19             |
| A246aR        | 1&2           | 60                               | 2               | 1               | 0.2    | 7               | 0.6842            | 57             |
| A252R         | 1&2           | 462                              | 17              | 14              | 1.39   | 13              | 0.4064            | 107            |
| A262/263L     | 1&2           | 169                              | 8               | 6               | 0.7    | 14              | 0.543             | 632            |
| A278L         | 1&2           | 3106                             | 89              | 35              | 3.6    | 25              | 0.4213            | 822            |
| A282L         | 1&2           | 5342                             | 128             | 34              | 4.83   | 25              | 0.4499            | 1228           |
| A284L         | 1&2           | 1996                             | 38              | 11              | 2.41   | 13              | 0.7312            | 311            |

|        |     |       |     |    |       |    |        |      |
|--------|-----|-------|-----|----|-------|----|--------|------|
| A286R  | 1&2 | 1284  | 28  | 16 | 1.42  | 15 | 0.5661 | 206  |
| A296R  | 1&2 | 334   | 10  | 3  | 0.7   | 2  | 0.1911 | 101  |
| A305L  | 1&2 | 873   | 22  | 12 | 3.44  | 14 | 0.6373 | 200  |
| A310L  | 1&2 | 976   | 10  | 3  | 1.33  | 5  | 0.4824 | 180  |
| A314R  | 1&2 | 43    | 3   | 1  | 0.38  | 3  | 0.4875 | 51   |
| A316R  | 1&2 | 224   | 4   | 2  | 0.14  | 11 | 0.3014 | 95   |
| A320R  | 1&2 | 486   | 10  | 4  | 0.79  | 3  | 0.2446 | 102  |
| A322L  | 1&2 | 420   | 9   | 6  | 1.53  | 11 | 0.5341 | 229  |
| A342L  | 1&2 | 2337  | 52  | 22 | 1.87  | 23 | 0.7188 | 1093 |
| A349L  | 1&2 | 2517  | 51  | 13 | 11.17 | 10 | 0.5    | 759  |
| A352L  | 1&2 | 1496  | 31  | 10 | 3.38  | 8  | 0.4589 | 1536 |
| A363R  | 1&2 | 4467  | 120 | 46 | 2.01  | 55 | 0.5589 | 1112 |
| A375R  | 1&2 | 419   | 14  | 7  | 1.24  | 6  | 0.3584 | 117  |
| A378L  | 1&2 | 868   | 64  | 11 | 1.57  | 8  | 0.2375 | 306  |
| A383R  | 1&2 | 946   | 17  | 12 | 1.06  | 13 | 0.4609 | 157  |
| A384dL | 1&2 | 2041  | 37  | 15 | 0.98  | 21 | 0.4548 | 659  |
| A398L  | 1&2 | 330   | 5   | 4  | 1.53  | 6  | 0.4237 | 184  |
| A405R  | 1&2 | 219   | 9   | 7  | 0.35  | 16 | 0.3387 | 252  |
| A407L  | 1&2 | 584   | 12  | 7  | 0.94  | 10 | 0.6714 | 335  |
| A413L  | 1&2 | 144   | 7   | 4  | 0.42  | 3  | 0.1475 | 41   |
| A414R  | 1&2 | 144   | 7   | 4  | 0.75  | 2  | 0.5054 | 54   |
| A421R  | 1&2 | 63    | 1   | 1  | 0.31  | 6  | 0.5306 | 230  |
| A430L  | 1&2 | 34014 | 531 | 33 | 13.06 | 23 | 0.5995 | 2982 |
| A437L  | 1&2 | 1500  | 29  | 9  | 19.75 | 11 | 0.7864 | 722  |
| A440L  | 1&2 | 22    | 4   | 2  | nd    | 2  | 0.2386 | 12   |
| A448L  | 1&2 | 221   | 5   | 4  | 1.06  | 7  | 0.6132 | 160  |
| A454L  | 1&2 | 3358  | 79  | 14 | 3.54  | 12 | 0.7474 | 1027 |
| A465R  | 1&2 | 94    | 4   | 2  | 0.56  | 7  | 0.4576 | 119  |
| A480L  | 1&2 | 47    | 3   | 1  | 0.35  | 2  | 0.2473 | 56   |
| A484L  | 1&2 | 34    | 2   | 2  | 0.18  | 9  | 0.5548 | 43   |
| A488R  | 1&2 | 2030  | 46  | 19 | 4.68  | 12 | 0.4732 | 365  |
| A497R  | 1&2 | 291   | 8   | 2  | 1.69  | 7  | 0.3973 | 93   |
| A500L  | 1&2 | 705   | 15  | 8  | 0.77  | 13 | 0.3722 | 764  |
| A521aL | 1&2 | 972   | 19  | 10 | 3.53  | 7  | 0.4257 | 118  |
| A521L  | 1&2 | 605   | 9   | 5  | 0.93  | 6  | 0.4306 | 66   |
| A523R  | 1&2 | 2560  | 49  | 18 | 24.79 | 11 | 0.8304 | 762  |
| A526R  | 1&2 | 431   | 13  | 8  | 1.55  | 9  | 0.8014 | 328  |
| A527R  | 1&2 | 223   | 7   | 6  | 2.69  | 6  | 0.4242 | 73   |
| A532L  | 1&2 | 82    | 4   | 2  | 0.4   | 4  | 0.519  | 430  |
| A533R  | 1&2 | 200   | 3   | 3  | 0.35  | 3  | 0.0722 | 4    |
| A534R  | 1&2 | 66    | 1   | 1  | 0.31  | 3  | 0.4857 | 30   |
| A535L  | 1&2 | 260   | 3   | 1  | 0.42  | 2  | 0.4085 | 60   |
| A536L  | 1&2 | 234   | 3   | 1  | 0.42  | 5  | 0.5342 | 331  |

|               |     |      |    |    |       |    |        |     |
|---------------|-----|------|----|----|-------|----|--------|-----|
| A558L         | 1&2 | 2749 | 47 | 24 | 6.04  | 13 | 0.5025 | 133 |
| A559L         | 1&2 | 599  | 14 | 7  | 1.84  | 9  | 0.3474 | 178 |
| A561L         | 1&2 | 2045 | 69 | 24 | 1.44  | 19 | 0.4206 | 331 |
| A565R         | 1&2 | 4321 | 70 | 26 | 2.49  | 33 | 0.6045 | 709 |
| A572R         | 1&2 | 233  | 9  | 6  | 1.11  | 11 | 0.7293 | 125 |
| A577L         | 1&2 | 54   | 2  | 2  | 0.22  | 3  | 0.2105 | 13  |
| A579L         | 1&2 | 663  | 17 | 6  | 0.77  | 9  | 0.4706 | 101 |
| A605L         | 1&2 | 72   | 6  | 3  | 0.42  | 8  | 0.5633 | 220 |
| A614L         | 1&2 | 1895 | 51 | 26 | 2.59  | 25 | 0.5338 | 571 |
| A622L         | 1&2 | 3903 | 71 | 29 | 4.19  | 18 | 0.5115 | 261 |
| A627R         | 1&2 | 1547 | 28 | 15 | 1.77  | 19 | 0.5483 | 384 |
| A643R         | 1&2 | 1337 | 50 | 26 | 3.22  | 12 | 0.2774 | 409 |
| A644R         | 1&2 | 2024 | 40 | 16 | 17.33 | 10 | 0.5723 | 370 |
| A676R         | 1&2 | 913  | 31 | 21 | 3.1   | 20 | 0.5561 | 302 |
| A678R         | 1&2 | 768  | 16 | 10 | 1.51  | 13 | 0.4494 | 232 |
| A157L         | 2   |      |    |    |       | 3  | 0.2273 | 25  |
| A164aR        | 2   |      |    |    |       | 4  | 0.5424 | 38  |
| A174L         | 2   |      |    |    |       | 2  | 0.1385 | 43  |
| A196L         | 2   |      |    |    |       | 4  | 0.3289 | 57  |
| A202L         | 2   |      |    |    |       | 4  | 0.4513 | 44  |
| A350R         | 2   |      |    |    |       | 2  | 0.2459 | 13  |
| A384bL        | 2   |      |    |    |       | 2  | 0.5    | 300 |
| A400R         | 2   |      |    |    |       | 2  | 0.2288 | 5   |
| A420L         | 2   |      |    |    |       | 2  | 0.3714 | 7   |
| A423R         | 2   |      |    |    |       | 2  | 0.1465 | 7   |
| A438L         | 2   |      |    |    |       | 2  | 0.3077 | 32  |
| A502L         | 2   |      |    |    |       | 7  | 0.4105 | 215 |
| A520L         | 2   |      |    |    |       | 4  | 0.5    | 30  |
| A531L         | 2   |      |    |    |       | 2  | 0.5821 | 176 |
| A532aL        | 2   |      |    |    |       | 3  | 0.32   | 35  |
| A612L         | 2   |      |    |    |       | 2  | 0.2437 | 6   |
| A018L         | 1   | 193  | 2  | 1  | 0.05  |    |        |     |
| A122/123cLz   | 1   | 123  | 16 | 2  | 0.02  |    |        |     |
| A122/123R     | 1   | 14   | 3  | 1  | nd    |    |        |     |
| A137R         | 1   | 24   | 1  | 1  | nd    |    |        |     |
| A172aL        | 1   | 18   | 6  | 1  | nd    |    |        |     |
| A173L         | 1   | 16   | 3  | 1  | 0.1   |    |        |     |
| A188aR        | 1   | 17   | 7  | 4  | 0.19  |    |        |     |
| A201aL        | 1   | 18   | 8  | 1  | nd    |    |        |     |
| A201L         | 1   | 53   | 1  | 1  | 0.35  |    |        |     |
| A219 222 226R | 1   | 14   | 5  | 2  | 0.04  |    |        |     |
| A255R         | 1   | 35   | 7  | 2  | 0.2   |    |        |     |
| A256/257L     | 1   | 26   | 14 | 6  | 0.03  |    |        |     |

|        |   |     |     |   |      |
|--------|---|-----|-----|---|------|
| A260aR | 1 | 16  | 4   | 2 | 0.44 |
| A271L  | 1 | 13  | 3   | 1 | nd   |
| A273L  | 1 | 133 | 3   | 2 | 0.22 |
| A287R  | 1 | 13  | 9   | 5 | 0.11 |
| A295L  | 1 | 14  | 2   | 1 | nd   |
| A304R  | 1 | 14  | 2   | 2 | nd   |
| A321R  | 1 | 38  | 1   | 1 | 0.26 |
| A339L  | 1 | 17  | 5   | 1 | 0.48 |
| A356R  | 1 | 19  | 3   | 1 | nd   |
| A436L  | 1 | 322 | 8   | 2 | 1.3  |
| A443R  | 1 | 250 | 133 | 3 | 0.09 |
| A456L  | 1 | 31  | 5   | 4 | 0.04 |
| A476R  | 1 | 33  | 4   | 1 | nd   |
| A540L  | 1 | 199 | 3   | 3 | 0.17 |
| A548L  | 1 | 20  | 14  | 5 | 0.06 |
| A567L  | 1 | 18  | 1   | 1 | 0.19 |
| A571R  | 1 | 28  | 7   | 3 | 0.26 |
| A586R  | 1 | 15  | 1   | 1 | nd   |
| A598L  | 1 | 13  | 4   | 3 | 0.08 |
| A617R  | 1 | 23  | 5   | 3 | nd   |
| A621L  | 1 | 165 | 3   | 1 | 0.26 |
| A624R  | 1 | 103 | 1   | 1 | 0.25 |
| A625R  | 1 | 15  | 5   | 3 | 0.07 |
| A629R  | 1 | 14  | 10  | 4 | 0.04 |
| A631L  | 1 | 17  | 3   | 1 | nd   |
| A655L  | 1 | 23  | 11  | 3 | 0.28 |
| A686L  | 1 | 17  | 31  | 1 | 0.18 |

128

129 \*emPAI: exponentially-modified protein abundance index

130

131 Table S3. Chlorovirus accession numbers and capsid protein paralog classes

| <b>Chlorovirus</b> | <b>CDS</b> | <b>NCBI Accession Number</b> | <b>Capsid protein paralog class</b> |
|--------------------|------------|------------------------------|-------------------------------------|
| AR158              | C048R      | YP_001498130.1               | III                                 |
| AR158              | C470R      | YP_001498551.1               | IV                                  |
| AR158              | C558L      | YP_001498639.1               | I                                   |
| AR158              | C675L      | YP_001498756.1               | III                                 |
| AR158              | C741L      | YP_001498822.1               | II                                  |
| ATCV-1             | Z151L      | YP_001426632.1               | II                                  |
| ATCV-1             | Z280L      | YP_001426761.1               | I                                   |
| ATCV-1             | Z506L      | YP_001426987.1               | III                                 |
| ATCV-1             | Z558L      | YP_001427039.1               | IV                                  |
| ATCV-1             | Z664R      | YP_001427145.1               | III                                 |
| FR483              | N074R      | YP_001425706.1               | III                                 |
| FR483              | N254L      | YP_001425886.1               | III                                 |
| FR483              | N274L      | YP_001425906.1               | III                                 |
| FR483              | N395R      | YP_001426027.1               | IV                                  |
| FR483              | N470L      | YP_001426102.1               | I                                   |
| FR483              | N737L      | YP_001426369.1               | II                                  |
| MT325              | M078R      | ABT13632                     | III                                 |
| MT325              | M269L      | ABT13823                     | III                                 |
| MT325              | M381R      | ABT13935                     | IV                                  |
| MT325              | M463L      | ABT14017                     | I                                   |

|        |        |                |     |
|--------|--------|----------------|-----|
| MT325  | M748L  | ABT14302       | II  |
| NY-2A  | B059R  | YP_001497255.1 | III |
| NY-2A  | B529R  | YP_001497725.1 | IV  |
| NY-2A  | B585L  | YP_001497781.1 | I   |
| NY-2A  | B617L  | YP_001497813.1 | I   |
| NY-2A  | B748L  | YP_001497944.1 | III |
| NY-2A  | B825L  | YP_001498021.1 | II  |
| PBCV-1 | A010R  | NP_048358.2    | III |
| PBCV-1 | A011L  | NP_048359.1    | III |
| PBCV-1 | A383R  | NP_048739.2    | IV  |
| PBCV-1 | A384dL | NP_048747.2    | V   |
| PBCV-1 | A430L  | NP_048787.1    | I   |
| PBCV-1 | A558L  | NP_048914.1    | III |
| PBCV-1 | A622L  | NP_048978.1    | II  |



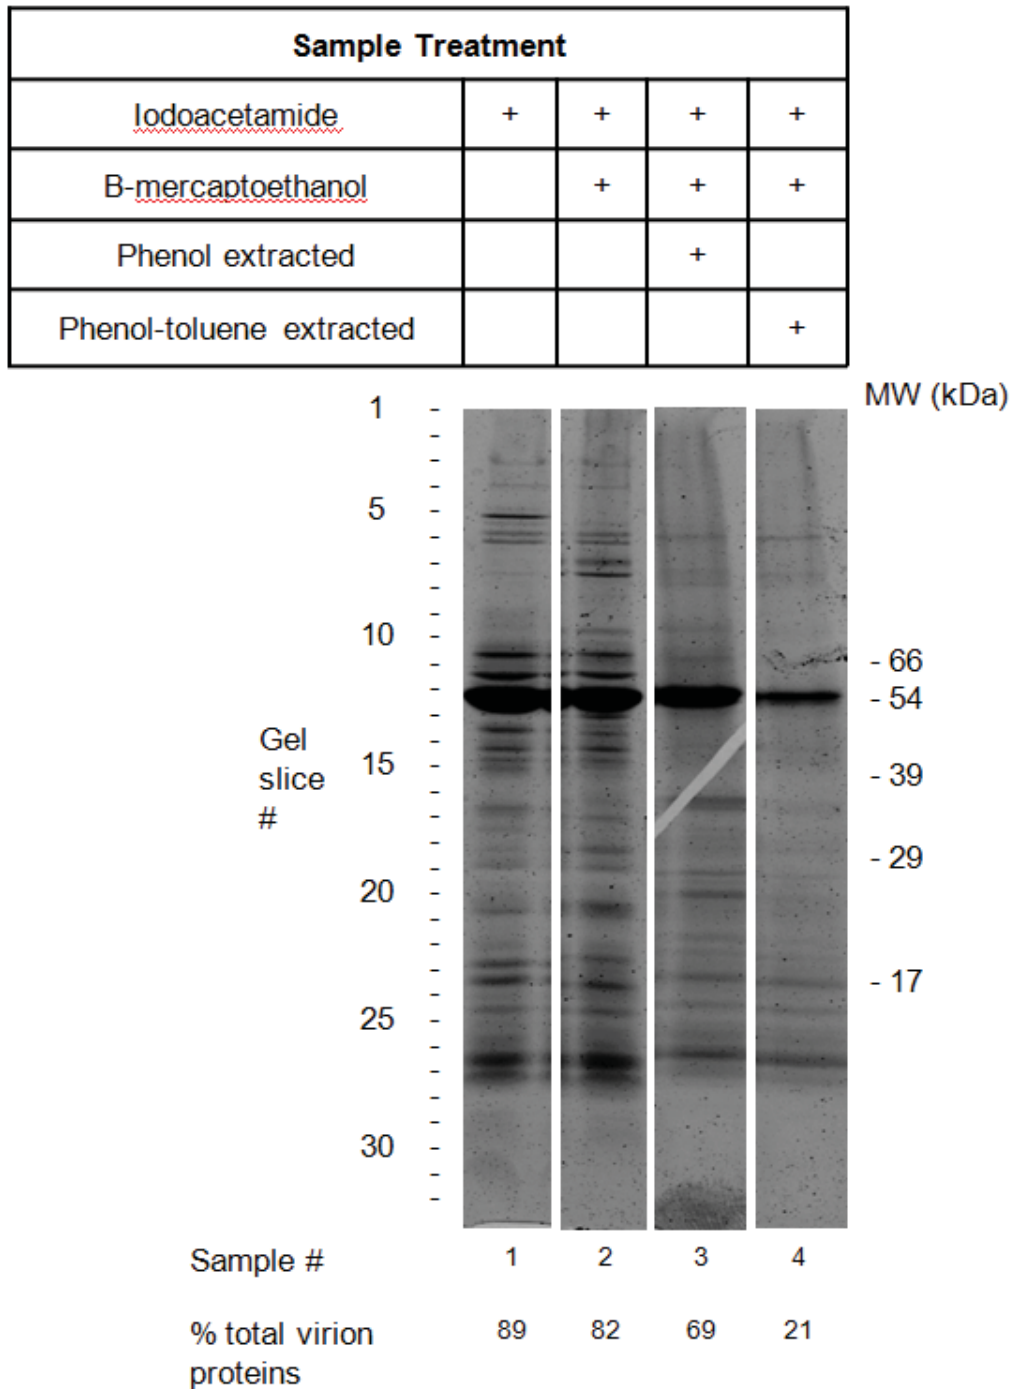

133

134 **Figure S1.** Protein extraction and separation of PBCV-1 virions using SDS-PAGE. Gradient

135 purified virions were solubilized and treated with various reagents, then separated on SDS-

136 PAGE. The gels were cut into 32 pieces and each gel piece was analyzed for tryptic peptide

137 fragments by Method 1. All the samples were treated with iodoacetamide; sample 2 was treated  
138 with beta-mercaptoethanol or dithiothreitol; sample 3 was treated as # 2 with phenol extraction;  
139 sample 4 was treated as #2 with phenol-toluene extraction. The percent of the total virion  
140 proteins detected with each method is at the bottom of the figure.

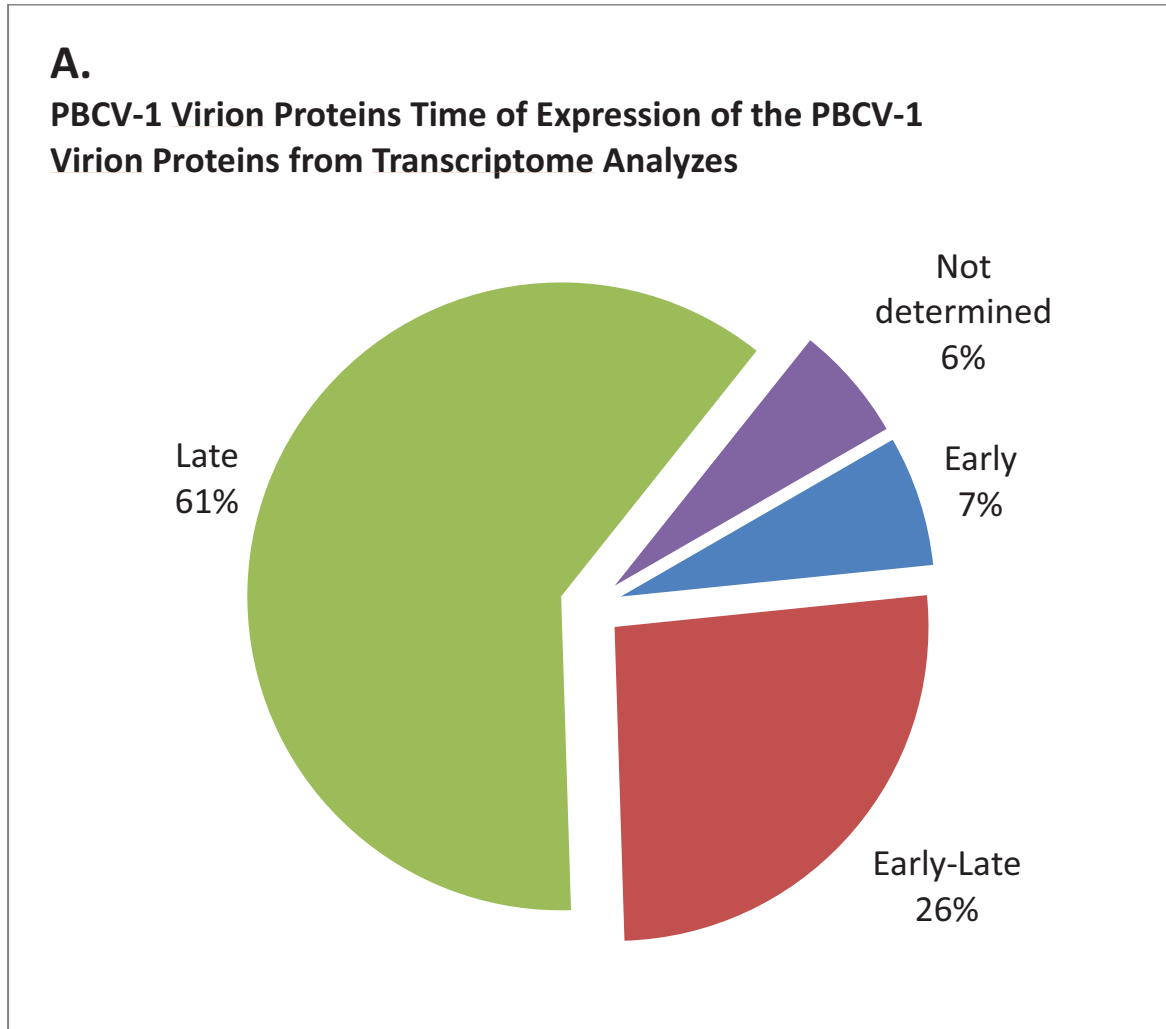

141

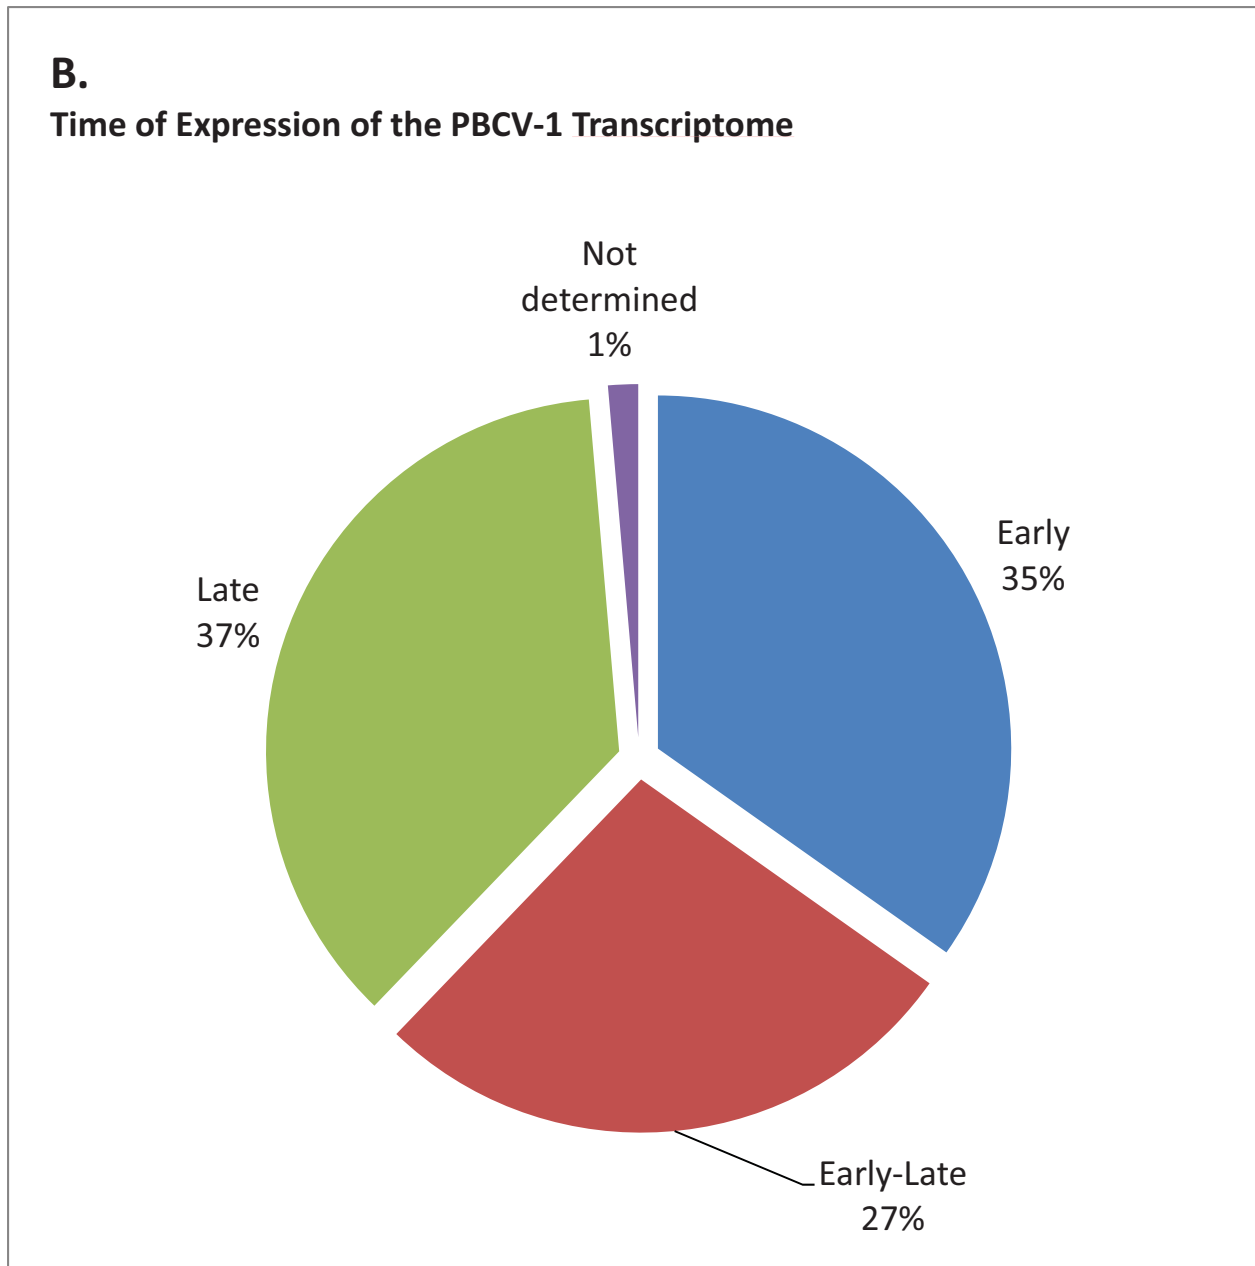

142 **Figure S2. (A)** Distribution of PBCV-1 genes as measured during the time course of replication.  
143 (A) The expression stages and relative abundances of the total CDSs as measured by microarray  
144 sequence hybridizations (10). **(B)** The expression stages of the genes associated with the virion  
145 proteome. Note, the fractions labeled “not determined” are genes that were not included in  
146 the microarray analyses.

A

## PBCV-1 Virion Proteome Functional Distribution

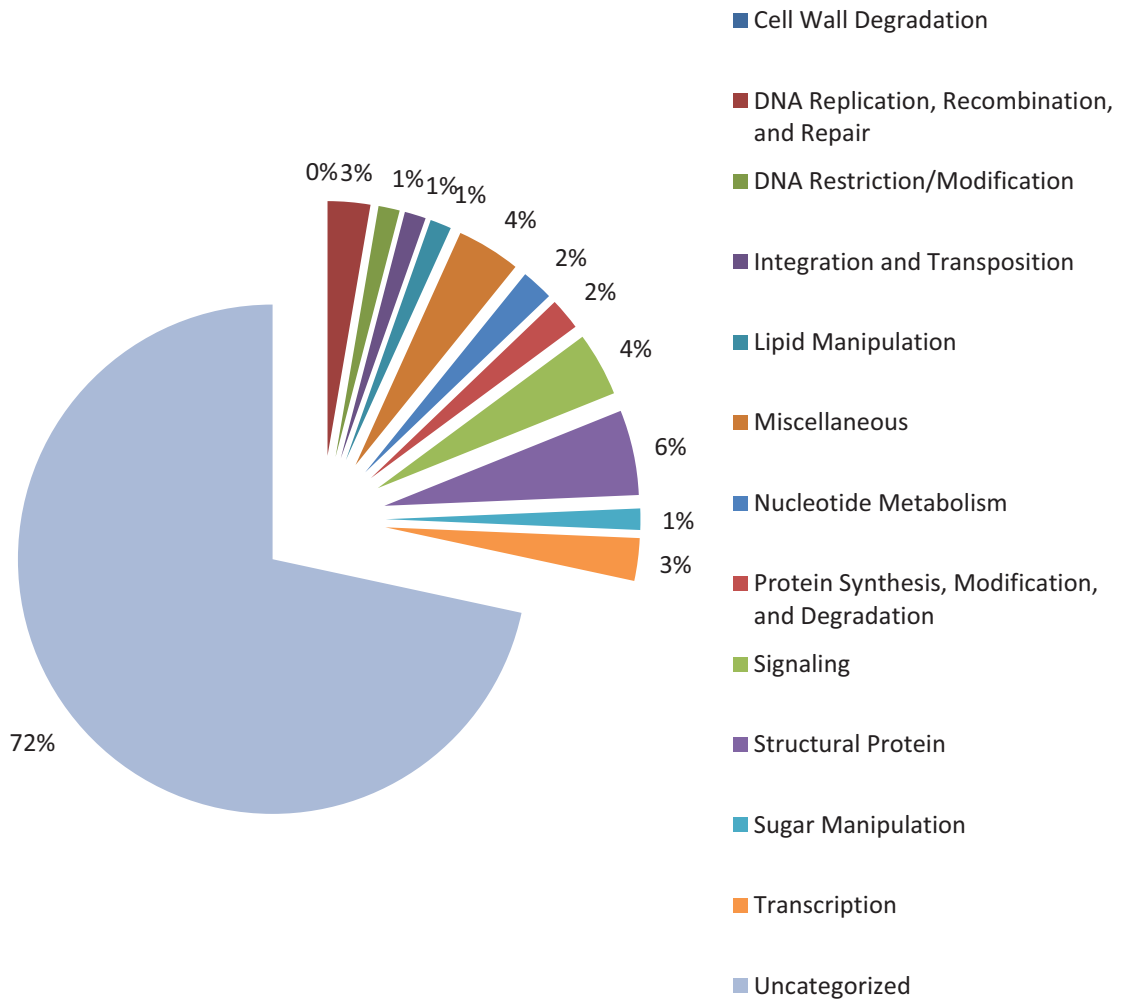

**B**

## PBCV-1 Total CDSs Functional Distribution

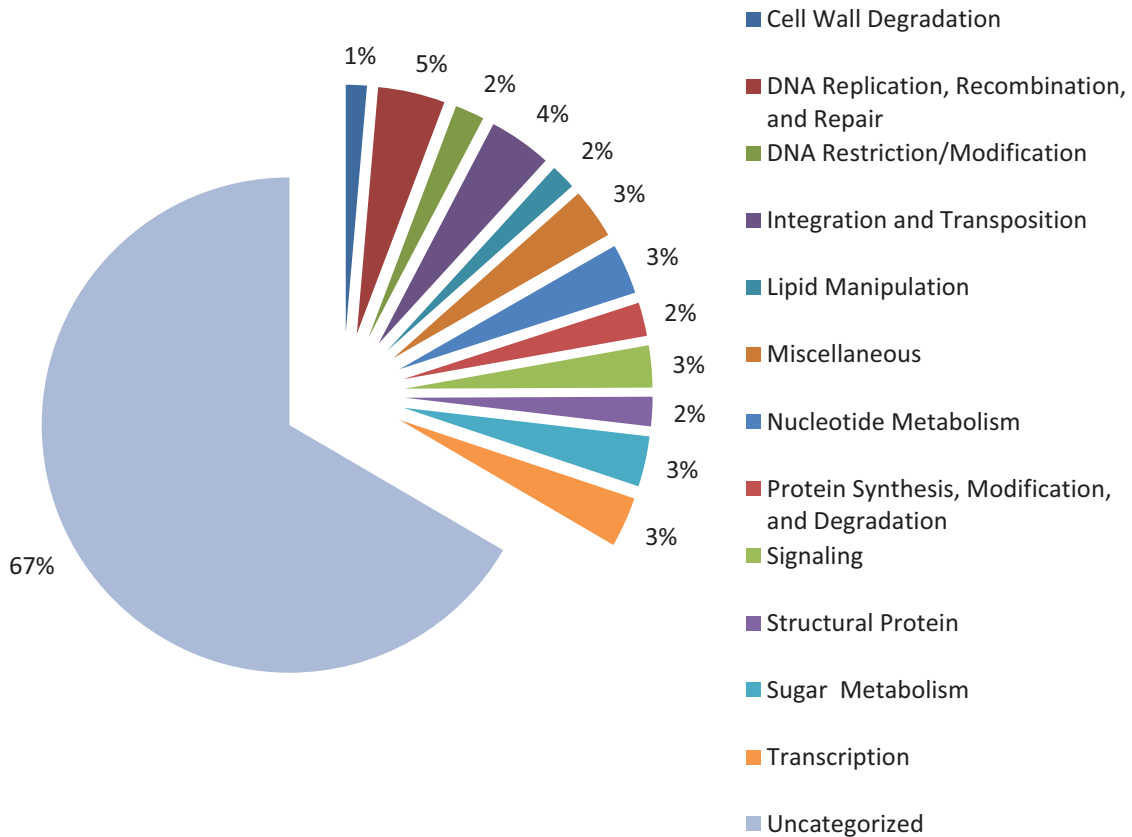

**Figure S3.** Functional distribution of PBCV-1 transcriptome and virion-associated proteome. (A) The functional distribution of the virion-associated proteins into 13 functional categories. The functional categories were determined from either sequence similarity analyses against the GenBank non-redundant database, or the proteins had activities determined biochemically. Note, there were no proteins detected with cell wall degradation associated with the virion proteins. (B) The 416 PBCV-1 coding CDSs are distributed into 13 functional categories.

## REFERENCES:

- 147  
148  
149
- 150 1. **Altschul, S. F., T. L. Madden, A. A. Schäffer, J. Zhang, Z. Zhang, W. Miller, and D.**  
151 **J. Lipman.** 1997. Gapped BLAST and PSI-BLAST: a new generation of protein  
152 database search programs. *Nucleic Acids Res.* **25**:3389-3402.
  - 153 2. **Bateman, A., L. Coin, R. Durbin, R. D. Finn, V. Hollich, S. Griffiths-Jones, A.**  
154 **Khanna, M. Marshall, S. Moxon, E. L. Sonnhammer, D. J. Studholme, C. Yeats,**  
155 **and S. R. Eddy.** 2004. The Pfam protein families database. *Nucleic Acids Res.* **32**:D138-  
156 141.
  - 157 3. **Lowe, T., and S. Eddy.** 1997. tRNAscan-SE: a program for improved detection of  
158 transfer RNA genes in genomic sequence. *Nucleic Acids Res.* **25**:955-964.
  - 159 4. **Moriya, Y., M. Itoh, S. Okuda, A. C. Yoshizawa, and M. Kanehisa.** 2007. KAAS: an  
160 automatic genome annotation and pathway reconstruction server. *Nucleic Acids Res.*  
161 **35**:W182-185.
  - 162 5. **Strasser, P., Y. P. Zhang, J. Rohozinski, and J. L. Van Etten.** 1991. The termini of the  
163 chlorella virus PBCV-1 genome are identical 2.2-kbp inverted repeats. *Virology* **180**:763-  
164 769.
  - 165 6. **Tatusov, R. L., N. D. Fedorova, J. D. Jackson, A. R. Jacobs, B. Kiryutin, E. V.**  
166 **Koonin, D. M. Krylov, R. Mazumder, S. L. Mekhedov, A. N. Nikolskaya, B. S. Rao,**  
167 **S. Smirnov, A. V. Sverdlov, S. Vasudevan, Y. I. Wolf, J. J. Yin, and D. A. Natale.**  
168 2003. The COG database: an updated version includes eukaryotes. *BMC Bioinformatics*  
169 **4**:41.

- 170 7. **Tcherepanov, V., A. Ehlers, and C. Upton.** 2006. Genome annotation transfer utility  
171 (GATU): rapid annotation of viral genomes using a closely related reference genome.  
172 BMC Genomics **7**:150.
- 173 8. **The UniProt Consortium.** 2007. Ongoing and future developments at the Universal  
174 Protein Resource. Nucleic Acids Res. **39**:D214-D219.
- 175 9. **Wheeler, D. L., T. Barrett, D. A. Benson, S. H. Bryant, K. Canese, V. Chetvernin, D.**  
176 **M. Church, M. DiCuccio, R. Edgar, S. Federhen, L. Y. Geer, W. Helmberg, Y.**  
177 **Kapustin, D. L. Kenton, O. Khovayko, D. J. Lipman, T. L. Madden, D. R. Maglott,**  
178 **J. Ostell, K. D. Pruitt, G. D. Schuler, L. M. Schriml, E. Sequeira, S. T. Sherry, K.**  
179 **Sirotkin, A. Souvorov, G. Starchenko, T. O. Suzek, R. Tatusov, T. A. Tatusova, L.**  
180 **Wagner, and E. Yaschenko.** 2006. Database resources of the National Center for  
181 Biotechnology Information. Nucleic Acids Res. **34**:D173-180.
- 182 10. **Yanai-Balser, G. M., G. A. Duncan, J. D. Eudy, D. Wang, X. Li, I. V. Agarkova, D.**  
183 **D. Dunigan, and J. L. Van Etten.** 2010. Microarray analysis of chlorella virus PBCV-1  
184 transcription. J.Virol. **84**:532-542.

185
